# 1 **Molecular and cellular dynamics of the developing human neocortex at single-cell** 2 **resolution**

3 **Authors:** Li Wang<sup>1,2\*#</sup>, Cheng Wang<sup>1,2\*</sup>, Juan A. Moriano<sup>3</sup>, Songcang Chen<sup>1,2</sup>, Shaobo Zhang<sup>4</sup>,  
4 Tanzila Mukhtar<sup>1,2</sup>, Shaohui Wang<sup>1,2</sup>, Arantxa Cebrián-Silla<sup>1,5</sup>, Qiuli Bi<sup>1,2</sup>, Jonathan J.  
5 Augustin<sup>1,2</sup>, Lilian Gomes de Oliveira<sup>1,6</sup>, Mengyi Song<sup>1,2</sup>, Xinxin Ge<sup>7</sup>, Guolong Zuo<sup>1,2</sup>,  
6 Mercedes F. Paredes<sup>1,2</sup>, Eric J. Huang<sup>1,8</sup>, Arturo Alvarez-Buylla<sup>1,5</sup>, Xin Duan<sup>4,7</sup>, Jingjing Li<sup>1,2#</sup>,  
7 Arnold R. Kriegstein<sup>1,2#</sup>

8  
9 <sup>1</sup>The Eli and Edythe Broad Center of Regeneration Medicine and Stem Cell Research, University  
10 of California San Francisco; San Francisco, CA 94143, USA.

11 <sup>2</sup>Department of Neurology, University of California San Francisco; San Francisco, CA 94143,  
12 USA.

13 <sup>3</sup>University of Barcelona Institute of Complex Systems; Barcelona, 08007, Spain

14 <sup>4</sup>Department of Ophthalmology, University of California San Francisco; San Francisco, CA  
15 94143, USA.

16 <sup>5</sup>Department of Neurological Surgery, University of California San Francisco; San Francisco,  
17 CA 94143, USA.

18 <sup>6</sup>Neuro-immune Interactions Laboratory, Institute of Biomedical Sciences, Department of  
19 Immunology, University of São Paulo; São Paulo, SP 05508-220, Brazil

20 <sup>7</sup>Department of Physiology, University of California San Francisco, San Francisco, CA 94143,  
21 USA.

22 <sup>8</sup>Department of Pathology, University of California San Francisco; San Francisco, CA 94143,  
23 USA.

24  
25 \*These authors contributed equally to this work.

26 #Corresponding author. e-mail: [Li.Wang@ucsf.edu](mailto:Li.Wang@ucsf.edu); [Jingjing.Li@ucsf.edu](mailto:Jingjing.Li@ucsf.edu);  
27 [Arnold.Kriegstein@ucsf.edu](mailto:Arnold.Kriegstein@ucsf.edu).

## 28 29 **Summary**

30 The development of the human neocortex is a highly dynamic process and involves complex  
31 cellular trajectories controlled by cell-type-specific gene regulation<sup>1</sup>. Here, we collected paired  
32 single-nucleus chromatin accessibility and transcriptome data from 38 human neocortical  
33 samples encompassing both the prefrontal cortex and primary visual cortex. These samples span  
34 five main developmental stages, ranging from the first trimester to adolescence. In parallel, we  
35 performed spatial transcriptomic analysis on a subset of the samples to illustrate spatial  
36 organization and intercellular communication. This atlas enables us to catalog cell type-, age-,  
37 and area-specific gene regulatory networks underlying neural differentiation. Moreover,  
38 combining single-cell profiling, progenitor purification, and lineage-tracing experiments, we  
39 have untangled the complex lineage relationships among progenitor subtypes during the

40 transition from neurogenesis to gliogenesis in the human neocortex. Specifically, we find a  
41 tripotential intermediate progenitor subtype termed Tri-IPC responsible for the local production  
42 of GABAergic neurons. Furthermore, by integrating our atlas data with large-scale GWAS data,  
43 we created a disease-risk map highlighting enriched ASD risk in second-trimester  
44 intratelencephalic projection neurons. Our study sheds light on the gene regulatory landscape and  
45 cellular dynamics of the developing human neocortex.

46

## 47 **Main Text**

48 Human neocortex development is a complex and coordinated process crucial for establishing the  
49 brain's intricate structure and functionality. In the developing neocortex, radial glia (RGs)  
50 generate glutamatergic excitatory neurons (ENs) in a characteristic inside-out pattern, with deep-  
51 layer neurons produced first, followed by upper-layer intratelencephalic (IT) projection neurons<sup>1</sup>.  
52 Subsequently, ENs migrate along the radial glial scaffold to the cortical plate, where they  
53 differentiate and form distinct cortical layers with coordinated synaptic connections. Meanwhile,  
54 GABAergic inhibitory neurons (INs) originating in the ganglionic eminence migrate to the  
55 cortex through the marginal and germinal zones, eventually becoming cortical interneurons of  
56 the adult cortex. During the late second trimester, RGs transition from neurogenesis to  
57 gliogenesis, producing astrocytes and oligodendrocyte lineage cells that populate the cortex.  
58 Cell-type-specific gene regulatory mechanisms that underlie cell proliferation and differentiation  
59 govern these highly regulated processes. However, our understanding of these mechanisms  
60 remains incomplete.

61 Gene regulation involves epigenetic reprogramming and subsequent gene expression changes<sup>2</sup>.  
62 Over the past decade, single-cell transcriptome<sup>3–13</sup> and chromatin accessibility<sup>14–16</sup> analyses have  
63 expanded our knowledge of cellular diversity and the molecular changes that occur during  
64 human neocortical development. However, in many instances, measurements of the  
65 transcriptome and epigenome were conducted independently, limiting our understanding of how  
66 these two modalities coordinate with each other to form regulatory networks in the same cell. A  
67 recent study explored gene-regulatory mechanisms in the developing human cortex by profiling  
68 chromatin accessibility and gene expression within the same nuclei<sup>17</sup>. However, the analysis was  
69 confined to a restricted number of samples and cell types, warranting further exploration to  
70 obtain a more comprehensive understanding.

71 In this study, we conducted paired RNA sequencing (RNA-seq) and assay for transposase-  
72 accessible chromatin with sequencing (ATAC-seq) on single nuclei derived from multiple  
73 regions and age groups of the developing human neocortex. In addition, spatial transcriptomic  
74 analysis was utilized to reveal cellular niches and cell-cell communication. These datasets have  
75 enabled the construction of a multi-omic atlas of the human neocortex across different  
76 developmental stages at single-cell resolution. Leveraging this atlas, we delve into understanding  
77 molecular and cellular dynamics of the developing human neocortex, including cellular  
78 composition, spatial organization, intercellular signaling, gene regulatory networks, lineage  
79 potential, and disease susceptibility. Our results highlight novel multipotential intermediate  
80 progenitor cells (IPCs) and cellular trajectories and shed light on the mechanisms of  
81 neuropsychiatric disorders.

## 82 **Results**

### 83 *A single-cell multi-omic survey of the developing human neocortex*

84 To characterize transcriptomic and epigenomic changes during human neocortex development,  
85 we obtained 27 brain specimens and 38 unique biological samples across five major  
86 developmental stages ranging from the first trimester to adolescence, covering key events such as  
87 neurogenesis, neuronal migration, gliogenesis, synaptogenesis, and myelination (Fig. 1a,  
88 Supplementary Table 1). In addition, we included samples from both the prefrontal cortex (PFC)  
89 and primary visual cortex (V1), two poles of the rostral-caudal axis of the neocortex, to  
90 understand regional diversity. Applying the single-nucleus multiome (snMultiome) technique  
91 from 10X Genomics, we obtained paired single-nucleus ATAC-seq and RNA-seq data from  
92 243,535 nuclei after quality control (see Methods). Some early-stage samples included brain  
93 regions other than the neocortex, such as the diencephalon and striatum (Extended Data Fig. 1a–  
94 d). We removed non-neocortical nuclei to focus our analysis on the neocortex, resulting in  
95 232,328 nuclei in the final dataset (Supplementary Table 2). We detected similar numbers of  
96 genes, transcripts, and ATAC peak region fragments across different samples, with a median of  
97 2289 genes, 4840 transcripts, and 4121 ATAC peak region fragments per nucleus (Extended Data  
98 Fig. 2a).

99 We performed weighted nearest neighbor analysis<sup>18</sup> to integrate information from the paired  
100 ATAC and RNA modalities. The resulting nearest neighbor graph was used for uniform manifold  
101 approximation and projection (UMAP) embedding and clustering. We used previously  
102 established hierarchical cortical cell-type architecture in the developing and adult human  
103 neocortex<sup>11,19</sup> as references for cluster annotation. Meanwhile, we took into consideration that  
104 cell identities can be ambiguous and transient during development. Therefore, we carefully  
105 evaluated the expression of marker genes (Extended Data Fig. 3, Supplementary Table 3) and  
106 determined 5 classes, 11 subclasses, and 33 high-fidelity cell types (Fig. 1b, Extended Data Fig.  
107 2b, Supplementary Table 2). As expected, cells primarily clustered according to their lineages  
108 and, within individual lineages, further clustered by types, age groups, and regions (Fig. 1b,c).  
109 ENs, oligodendrocytes, and astrocytes showed strong regional differences (Fig. 1b,c). By  
110 contrast, INs, oligodendrocyte precursor cells (OPCs), microglia, and vascular cells lacked  
111 strong region specificity (Fig. 1b,c). Compared with UMAP embeddings based on either ATAC  
112 or RNA, embeddings based on both modalities had a more precise separation between cell types,  
113 age groups, and regions, suggesting that combination of both modalities better delineates  
114 spatiotemporal cell identities (Extended Data Fig. 2c).

115 Cell type proportions were comparable between samples of the same age group and region  
116 (Extended Data Fig. 2a). However, cell type proportions became substantially different when  
117 samples across age groups or regions were compared (Fig. 1d, Supplementary Table 3).  
118 Specifically, progenitors (e.g., RG-vRGs [moderated t-test,  $P_{adj.} = 1.61E-06$ ] and IPC-ENs [ $P_{adj.}$   
119  $= 9.03E-06$ ]) and immature neurons (e.g., EN-Newborns [ $P_{adj.} = 9.42E-08$ ] and EN-IT-  
120 Immatures [ $P_{adj.} = 2.48E-09$ ]) were more abundant in the first and second trimester but became  
121 depleted at later stages. Conversely, proportions of upper-layer intratelencephalic (IT) neurons  
122 (e.g., EN-L2\_3-ITs [ $P_{adj.} = 1.17E-03$ ] and EN-L4-ITs [ $P_{adj.} = 1.14E-03$ ]) and macroglia (e.g.,  
123 Astrocyte- Protoplasmic [ $P_{adj.} = 6.27E-06$ ] and Oligodendrocytes [ $P_{adj.} = 3.14E-11$ ]) became  
124 more abundant after birth. Moreover, EN-L4-ITs were more abundant in V1 than in PFC after the  
125 third trimester ( $P_{adj.} = 1.10E-02$ ), consistent with the expansion of the thalamorecipient layer 4  
126 in V1.

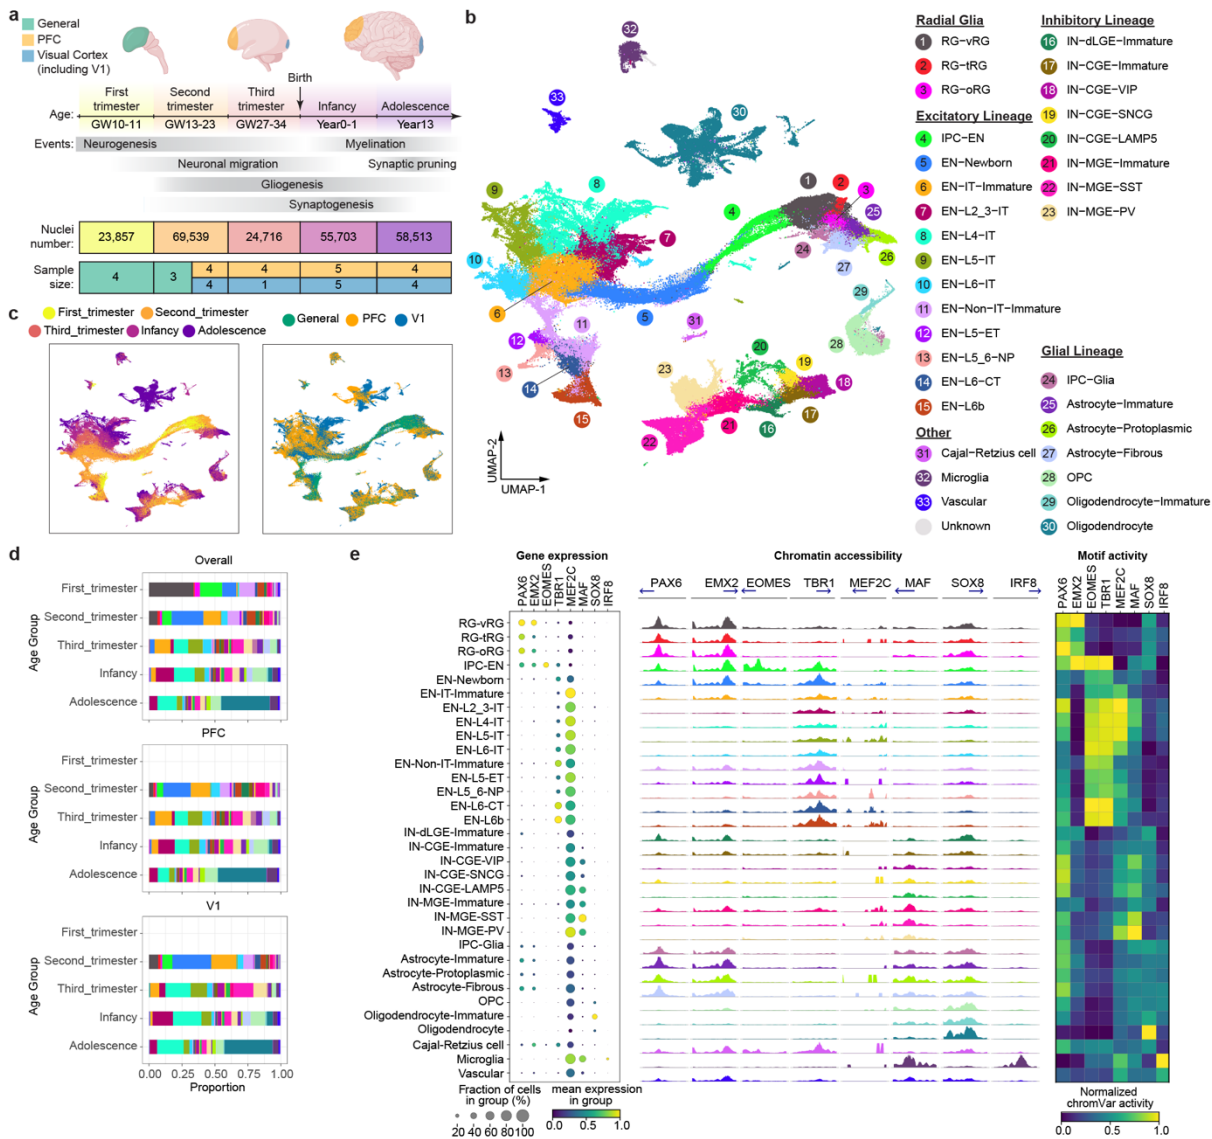

**Fig. 1 | A multi-omic survey of the developing human neocortex. a**, Description of samples used in this study. **b**, UMAP plots of the snMultiome data showing the distribution of 33 cell types. **c**, UMAP plots showing the distribution of age groups (left) and regions (right). **d**, Proportion of individual cell types across developmental stages and cortical regions. Bars are color-coded by cell types, the legend of which can be found in panel a. **e**, Left, dotplot of the signature transcriptional factors (TFs) in individual cell types. Middle, aggregated chromatin accessibility profiles on the promoter of signature TFs across cell types. The blue arrow represents each TF's transcriptional starting site and gene body. Right, heatmap of normalized chromVar motif activity of signature TFs across cell types.

127 To further evaluate data quality, we compared gene expression, chromatin accessibility, and  
 128 transcriptional regulatory activities of lineage-specific transcription factors (TFs) across cell  
 129 types (Supplementary Table 4). We found that the three attributes were concordant with each  
 130 other at most genomic loci (Fig. 1e). For example, *PAX6* and *EMX2*, two TFs critical for cortical  
 131 neural progenitor specification<sup>20</sup>, were selectively expressed, had high promoter accessibility,  
 132 and exhibited enriched motif activities in RGs (Fig. 1e). Similar results were obtained with other  
 133 lineage-specific TFs. Thus, dynamic changes in epigenome and transcriptome are highly  
 134 coordinated during human neocortex development.



### 135 ***Molecularly defined cytoarchitecture of the developing human neocortex***

136 To localize the observed cell types from our snMultiome data, we performed spatial  
137 transcriptomic analysis of the developing human neocortex using multiplexed error-robust  
138 fluorescence in situ hybridization (MERFISH)<sup>21</sup>. First, guided by the snMultiome data, we  
139 designed a 300-gene panel composed of gene markers for the main cell types in the developing  
140 cortex (Fig. 1b, Supplementary Table 5). We then analyzed their expression patterns in PFC and  
141 V1 at three age groups from the second trimester to infancy (Supplementary Table 5). From six  
142 samples, we retained 404,030 high-quality cells, resulting in 29 cell types that had one-to-one  
143 correspondence to those at similar stages in the snMultiome data (Fig. 2a, Extended Data Fig.  
144 4a,b, Supplementary Table 6). To determine the cytoarchitecture of the developing neocortex, we  
145 defined a cell's neighborhood as each cell's 50 closest neighbors. We then unbiasedly divided  
146 cells into 10 niches based on the cell type composition of their neighborhoods. The 10 identified  
147 niches coincided well with histologically established cortical domains and were thus named after  
148 their closest counterpart (Fig. 2a).

149 Different cell types exhibited distinct patterns of niche distribution. Neural progenitors were  
150 primarily localized in the ventricular/subventricular zone (VZ/SVZ), whereas mature ENs were  
151 confined to their specific cortical layers throughout development (Fig. 2b, Extended Data Fig.  
152 5a–f). Immature interneurons in the second trimester were enriched in both the marginal zone  
153 and VZ/SVZ, two routes they use to migrate into the cortex<sup>22</sup>. In the second trimester, the overall  
154 ratio of migrating interneurons in the marginal zone to VZ/SVZ was 1:4.1. Interestingly, this  
155 ratio was 1:3.3 for caudal ganglionic eminence (CGE)-derived interneurons and 1:5.2 for medial  
156 ganglionic eminence (MGE)-derived interneurons ( $P < 2.2E-16$ , Fisher's exact test),  
157 demonstrating lineage-specific preference in migration routes. This bias may contribute to the  
158 laminar distribution of interneuron subtypes at later stages, with CGE-derived interneurons  
159 enriched in upper layers and IN-MGE-PVs enriched in layers 4–6 (Fig. 2a,b, Extended Data Fig.  
160 5a–f). The dorsal lateral ganglionic eminence (dLGE) primarily gives rise to olfactory bulb  
161 interneurons<sup>23</sup>. Interestingly, we observed immature INs expressing *MEIS2*, *SP8*, *TSHZ1*, and  
162 *PBX3*, presumably originating from dLGE (IN-dLGE-Immatures), in the white matter across all  
163 three age groups (Extended Data Fig. 5a–f). These neurons will likely constitute a subset of the  
164 white matter interstitial GABAergic interneurons in adulthood. Regarding glial cells, OPCs were  
165 evenly distributed between gray and white matter from the second trimester to infancy. However,  
166 oligodendrocytes were predominantly present in the white matter for all three age groups (Fig.  
167 2b, Extended Data Fig. 5a–f). This difference supports a non-progenitor role of OPCs in cortical  
168 gray matter<sup>24</sup>. Microglia were highly enriched in the white matter (Fig. 2b, Extended Data Fig.  
169 5a–f), consistent with their spatial distribution in the adult brain<sup>25</sup>.

170 In early neonatal and adult mammalian brains, neurogenesis continues in the VZ/SVZ of the  
171 lateral ventricles, and the interneurons produced migrate to the olfactory bulb<sup>26</sup>. Most of these  
172 olfactory bulb interneurons are GABAergic but some could be glutamatergic<sup>27</sup>. We examined our  
173 perinatal PFC sample, which contained VZ/SVZ. We found a surprisingly large number of  
174 glutamatergic EN-Newborns, along with a small number of IPC-ENs, specifically within the  
175 SVZ (Extended Data Fig. 5c). Remarkably, within the VZ/SVZ of this sample, the count of EN-  
176 Newborns was 10.3-fold higher than that of IN-dLGE-Immatures, which are considered putative  
177 newborn GABAergic olfactory bulb interneurons. Whether these late-born EN-Newborns will  
178 migrate to the cortical gray matter, the subcortical white matter, or the olfactory bulb remains to  
179 be determined.

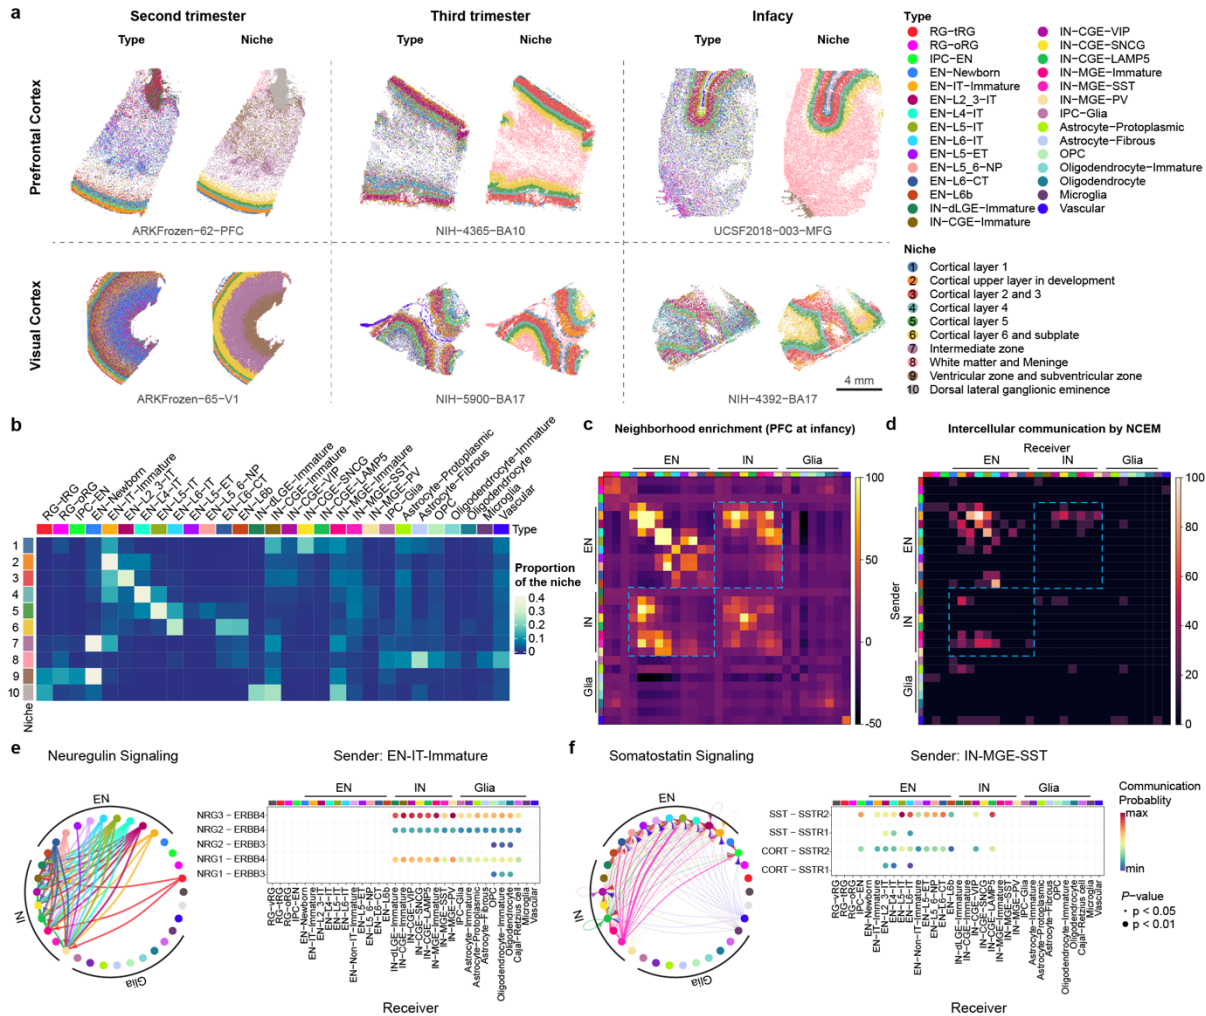

**Fig. 2 | Cell-cell communication in the developing human neocortex.** **a**, Spatial transcriptomic analysis of six neocortical samples. Cells are color-coded by types or the niches to which they belong. **b**, Proportion of different cell types in individual niches. Niche numbers correspond to the legend in panel **a**. **c**, Heatmap showing neighborhood enrichment scores of the PFC sample at infancy. The row and column annotations are color-coded by cell types, the legend of which can be found in panel **a**. **d**, Heatmap showing the percentage of significant intercellular communication determined by NCEM identified across all datasets. The row and column annotations are color-coded by cell types, the legend of which can be found in panel **a**. **e**, Left, Circular plot showing the direction of cellular interactions mediated by neuregulin signaling. Right, dotplot showing communication probability of example ligand-receptor pairs in the neuregulin signaling pathway from EN-IT-Immature to other cell types. Empty space means the communication probability is zero. P-values were calculated by one-sided permutation test. **f**, Left, Circular plot showing the direction of cellular interactions mediated by somatostatin signaling. Right, dotplot showing communication probability of example ligand-receptor pairs in the somatostatin signaling pathway from IN-MGE-SST to other cell types. Empty space means the communication probability is zero. P-values were calculated by one-sided permutation test.

## 180 *Cell-cell communication in the developing human neocortex*

181 To identify cell-cell communication in the developing human neocortex, we first evaluated the  
 182 spatial proximity of cell types in each MERFISH sample through neighborhood enrichment  
 183 analysis. We found that different types of ENs were enriched in their own neighborhoods,  
 184 consistent with their strong layer specificity. Interestingly, we also observed robust neighborhood  
 185 enrichment between specific types of ENs and INs, such as EN-IT-Immatures and IN-CGE-SNCGs,

186 as well as EN-L4-ITs and IN-MGE-SSTs (Fig. 2c, Extended Data Fig. 6a). To determine if the  
187 gene expression of a cell type was influenced by its proximity to a neighboring cell type, we  
188 performed node-centric expression modeling (NCEM)<sup>28</sup>. Cell communication inference via  
189 NCEM revealed strong interactions among various types of ENs and between ENs and INs  
190 across multiple datasets (Fig. 2d, Extended Data Fig. 6b, Supplementary Table 7). Notably, the  
191 presence of EN-IT-Immatures (sender) affected gene expression in various IN types (receivers).  
192 In contrast, the presence of IN-MGE-SSTs (sender) influenced gene expression in multiple EN  
193 types (receivers).

194 Since most of the MERFISH samples were collected from stages preceding the peak of  
195 synaptogenesis in humans, we resorted to ligand-receptor analysis using CellChat<sup>29</sup> to identify  
196 potential mechanisms underlying the communication between ENs and INs (Extended Data Fig.  
197 6c). Focusing on EN-IT-Immatures and IN-MGE-SSTs as ligand producing cells, we found that  
198 neuregulin and somatostatin were potential mediators for their communication with INs and  
199 ENs, respectively (Fig. 2e, Supplementary Table 8). Together, our findings highlight the  
200 reciprocal communications between the two major neuronal subclasses during human cortical  
201 development.

### 202 ***Gene regulatory networks in the developing human neocortex***

203 To establish the gene regulatory networks (GRNs) governing human neocortical development,  
204 we employed SCENIC<sup>+30</sup>, a computational framework that combines single-cell ATAC and gene  
205 expression data with motif discovery to infer enhancer-driven regulons (eRegulons), linking  
206 individual TFs to their respective candidate enhancers and target genes. Our analysis identified a  
207 total of 582 eRegulons, comprising 385 transcriptional activators and 197 repressors  
208 (Supplementary Table 9). These eRegulons collectively targeted 8134 regions and 8048 genes.  
209 We quantified the activity of each eRegulon in each nucleus using the AUCcell algorithm<sup>31</sup>,  
210 assessing region-based and gene-based AUC scores according to the overall accessibility of  
211 target regions and expression levels of target genes, respectively.

212 Consistent with expectations, expression levels of transcriptional activators exhibited a positive  
213 correlation with the AUC scores of their target regions and genes, whereas transcriptional  
214 repressors negatively correlated with their targets (Extended Data Fig. 7a). Focusing on  
215 activators, we not only recovered established master regulators of cortical progenitors (e.g.,  
216 *EMX1* and *SALL1*), ENs (e.g., *FOXP1* and *TBR1*), INs (e.g., *ARX* and *LHX6*) but also uncovered  
217 novel cell-type-specific eRegulons that potentially serve as lineage-determining factors (Fig. 3a,  
218 Supplementary Table 10).

219 In addition, we observed that many cell-type-specific eRegulons shared target regions and target  
220 genes (Extended Data Fig 7b). Notable instances included *TCF7L1* and *TCF7L2* in RG-vRGs,  
221 *GLIS1* and *SMAD3* in EN-L4-ITs, *MAF* and *PRDM1* in IN-MGE-PVs, *PAX6* and *SOX9* in  
222 Astrocyte-Protoplasmics, as well as *OLIG2* and *VSX1* in OPCs (Fig. 3b, Extended Data Fig. 7c-  
223 d). This cooperative sharing of regulatory targets likely serves to increase the robustness of  
224 GRNs against transcriptional noise or perturbations during cortical development.

### 225 ***Genetic programs that determine excitatory neuron identities***

226 Having established the GRNs, we sought to understand how the activation of cell-type-specific  
227 eRegulons controls cortical neuron differentiation. To this end, we selected nuclei from EN  
228 lineages, inferred nine differentiation trajectories originating from RG-vRG, and calculated



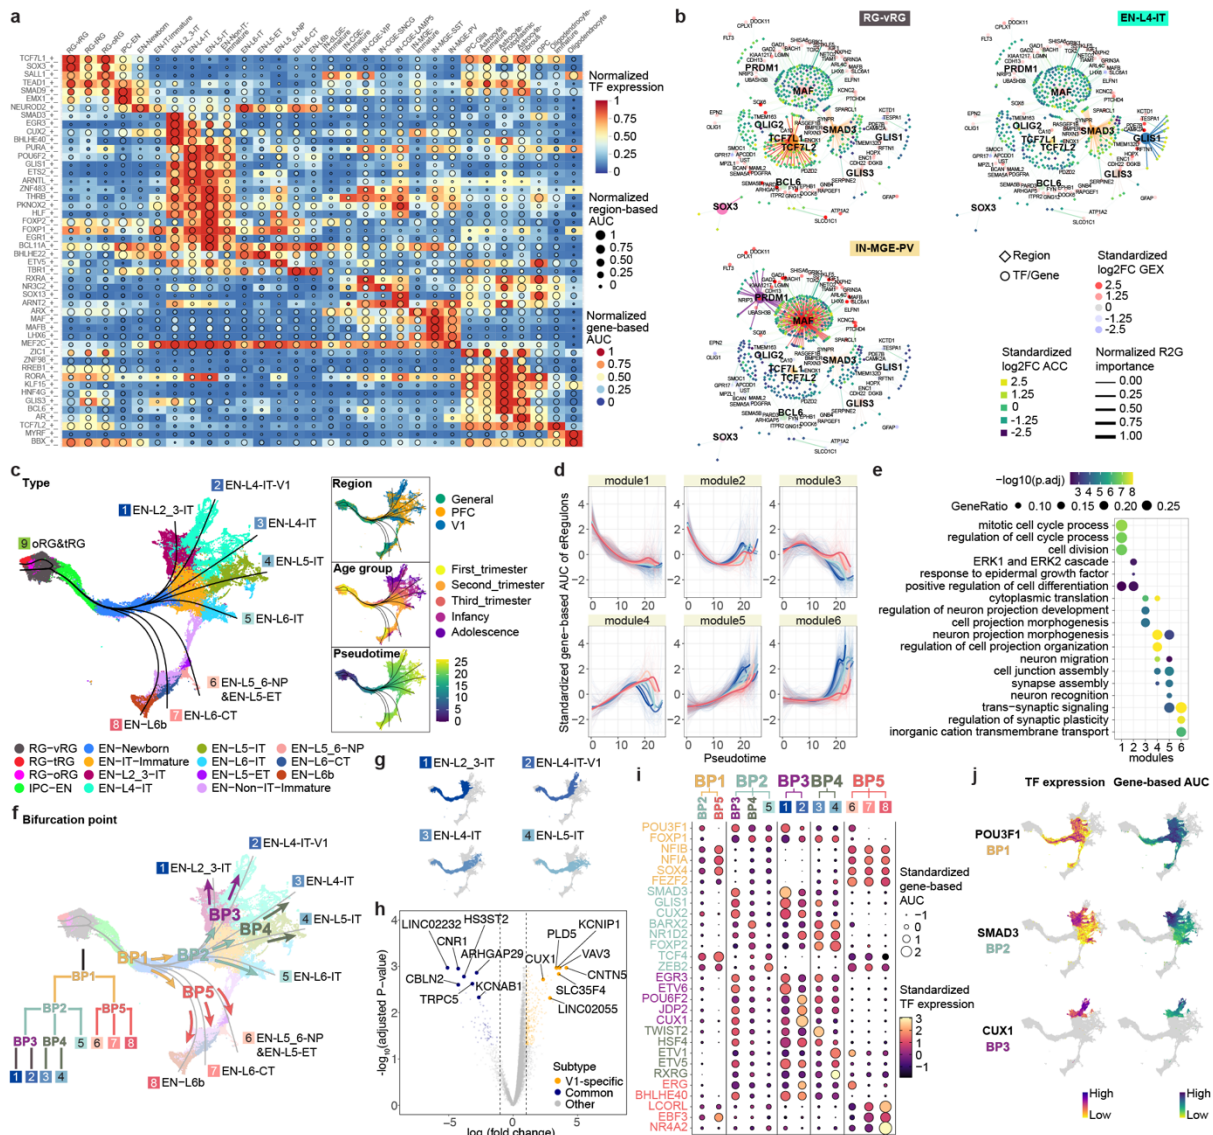

**Fig. 3 | Gene regulatory networks that establish cell identities.** **a**, Heatmap-dotplot showing the min-max normalized TF expression levels, region-based AUC scores, and gene-based AUC scores of selective eRegulons across cell types. **b**, Gene regulatory networks of selective eRegulons in three distinct cell types (RG-vRG, EN-L4-IT, and IN-MGE-PV). TF nodes and their links to enhancers are individually colored. The size and the transparency of the TF nodes represent their gene expression levels in each cell type. **c**, UMAP plots of cells belonging to excitatory neuron lineages showing the nine trajectories. Cells are color-coded by types, regions, age groups, or pseudotime. **d**, Standardized gene-based AUC scores of six eRegulon modules along the trajectories of excitatory neuron lineages. eRegulons are color-coded by neuronal subtypes. Thick, non-transparent lines represent the average AUC scores of each module in each lineage. **e**, Gene ontology enrichment analysis for target genes of individual eRegulon modules. Empty space means adjusted P values > 0.05. Hypergeometric test; nominal P values were adjusted by the Benjamini and Hochberg method. **f**, Bifurcation points during excitatory neuron differentiation. **g**, Trajectories of four intratelencephalic neuron lineages. **h**, Volcano plots highlighting differentially expressed genes between V1-specific and common EN-L4-IT neurons. Likelihood ratio test; nominal P values were adjusted by the Benjamini and Hochberg method. **i**, Dotplot highlighting representative eRegulons (activators) involved in trajectory determination at bifurcation points. **j**, UMAP plots highlighting representative eRegulons involved in trajectory determination at bifurcation points.

229 pseudotime values for each nucleus (Fig. 3c, Extended Data Fig. 8a–f, Supplementary Table  
 230 11)<sup>32</sup>. Except for one trajectory leading to late-stage radial glia (oRG and tRG), the remaining

231 eight trajectories ended with terminally differentiated ENs. Utilizing a generalized additive  
232 model<sup>33</sup>, we analyzed eRegulon activity along each trajectory, categorizing all eRegulons into six  
233 modules based on their temporal patterns of activity (Fig. 3d, Supplementary Table 12). Overall,  
234 all six modules exhibited distinct activity patterns along the pseudotime but comparable patterns  
235 across trajectories (Fig. 3d). Modules specifically active in the early, intermediate, and late stages  
236 respectively promoted cell division, cell projection morphogenesis, and synaptic plasticity (Fig.  
237 3e, Supplementary Table 12). These findings highlight that most eRegulons demonstrate  
238 conserved activity across various types of ENs, governing shared cellular processes during  
239 neuronal differentiation.

240 Our subsequent objective was to explore gene regulatory mechanisms that determine EN  
241 identities. To achieve this, we pinpointed five bifurcation points (BPs) along the eight  
242 differentiation trajectories (Fig. 3f). An intriguing finding emerged regarding EN-L4-ITs, which  
243 delineated into two distinct trajectories based on their region of origin (Fig. 3c,f). Specifically,  
244 the divergence occurred at BP2, where V1-specific EN-L4-ITs continued their trajectory  
245 alongside EN-L2\_3-IT, while the EN-L4-ITs shared between PFC and V1 followed a trajectory  
246 partially overlapping with EN-L5-IT (Fig. 3f,g). To further discriminate between the two EN-L4-  
247 IT subtypes, we performed differential gene expression analysis, identifying 1,908 differentially  
248 expressed genes between V1-specific and common EN-L4-ITs (Fig. 3h, Extended Data Fig. 9a,b,  
249 Supplementary Table 13). We then examined the expression patterns of top differentially  
250 expressed genes using in situ hybridization (ISH) data from Allen Brain Atlas. Notably, *CUX1*  
251 and *KCNIP1*, two genes preferentially expressed in V1-specific EN-L4-IT, exhibited stronger  
252 ISH signals in layer 4 of V1 compared to the adjacent secondary visual cortex (V2) (Extended  
253 Data Fig. 9c). In contrast, the common EN-L4-IT biased gene *KCNAB1* showed robust and  
254 specific signals in layer 4 of V2 but only displayed scattered signals in V1 (Extended Data Fig.  
255 9c). Moreover, both V1-specific and common EN-L4-ITs expressed markers of their counterparts  
256 recently reported in the adult human cortex<sup>34</sup> (Extended Data Fig. 9d). These findings confirm  
257 the presence of V1-specific EN-L4-ITs in the developing neocortex and underscore their distinct  
258 developmental trajectory compared to EN-L4-ITs found in other cortical regions.

259 To identify eRegulons associated with lineage bifurcation, we segmented the differentiation  
260 trajectories into five parts and conducted trajectory-based differential eRegulon activity analysis  
261 within specific segments encompassing each BP (Extended Data Fig. 8g, Methods). Among the  
262 top-ranked differentially active eRegulons at BPs were those featuring well-established TFs  
263 crucial for cell identity acquisition, including *CUX2* for upper-layer IT neurons, *FEZF2* for non-  
264 IT neurons, and *NR4A2* for EN-L6bs (Fig. 3i, Supplementary Table 14). Furthermore, our  
265 analysis revealed novel candidate regulators at multiple levels of lineage bifurcation, such as  
266 *POU3F1* for IT neurons, *SMAD3* for upper-layer IT neurons, and *CUX1* for V1-specific EN-L4-  
267 ITs, among many others (Fig. 3i,j, Extended Data Fig. 8h). Collectively, these results reveal  
268 genetic programs that control the divergence of EN identities.

### 269 ***Lineage potential of glial progenitors in the late second trimester***

270 Between gestational week 18 and 26, RGs in the human neocortex gradually transition from  
271 neurogenesis to gliogenesis<sup>35</sup>. However, our understanding of gliogenesis in the human  
272 neocortex is still limited compared to neurogenesis. In the snMultiome dataset, we identified a  
273 total of 10 different cell types within the macroglia lineage, including three RGs types, IPC-Glia,  
274 and other cell types associated with either the astrocyte or oligodendrocyte lineages (Extended  
275 Data Fig. 10a,b). Among these cell types, *EGFR*<sup>high</sup>*OLIG2*<sup>+</sup> IPC-Glia have been previously



276 reported by us and others as “pre-OPC”<sup>36</sup>, “pri-OPC”<sup>37</sup>, “mGPC”<sup>15</sup>, “bMIPC”<sup>38</sup>, or “GPC”<sup>39</sup> in  
277 humans. A similar cell type has been noted in mice as “pri-OPC”<sup>40</sup>, “tri-IPC”<sup>41</sup>, or “MIPC”<sup>42</sup>.  
278 Studies using human tissue have demonstrated IPC-Glia’s capacity to generate OPCs<sup>36</sup> and  
279 astrocytes<sup>39</sup>. Moreover, genetic labeling experiments in mice suggested their additional potential  
280 to produce olfactory bulb interneurons<sup>41</sup>. Despite these advancements, ongoing debates and  
281 uncertainties persist regarding the origin and lineage potential of human glial progenitors,  
282 especially in the late second trimester, when a variety of glial progenitor types emerge.

283 To address this uncertainty, we leveraged our snMultiome data collected between gestational  
284 week 20 to 24 and explored the expression patterns of surface protein markers (Extended Data  
285 Fig. 10c.d). We identified five proteins whose combinatorial expression effectively distinguishes  
286 between different glial cell types in the late second trimester (Fig. 4a, Extended Data Fig. 10e).  
287 Employing tissue dissection, surface protein staining, and fluorescence-activated cell sorting, we  
288 isolated four different glial progenitors—RG-tRGs, RG-oRGs, IPC-Glia, and OPCs (Fig. 4b,  
289 Extended Data Fig. 10f) from the late second-trimester human cortex. We first assessed the  
290 isolated cells morphologically after culturing for five days in basal culture medium without  
291 growth factor supplement (Fig. 4b). RG-tRGs and RG-oRGs were mostly unipolar, featuring a  
292 large soma and a thick, long primary process akin to the radial fiber. IPC-Glia appeared mostly  
293 bipolar or oligopolar, with shorter processes compared to RGs. OPCs exhibited a “bushy”  
294 morphology, suggesting they had started differentiating into pre-myelinating oligodendrocytes.  
295 Most cells in the OPC culture died within 8 days, consistent with their dependence on specific  
296 growth factors for survival<sup>39</sup>. Thus, our subsequent analysis focused on the remaining three  
297 progenitor types. We immunostained the sorted cells on day one in vitro (DIV1) to validate their  
298 identities (Extended Data Fig. 11a–f). Isolated RG-tRGs and RG-oRGs were positive for the  
299 progenitor marker, TFAP2C, whereas the tRG marker, CRYAB, was specifically expressed in  
300 RG-tRGs. In contrast, IPC-Glia were positive for both OLIG2 and EGFR. Few cells across all  
301 three cultures displayed positivity for the EN marker, NeuN, the astrocyte marker, SPARCL1, or  
302 the IN lineage marker, DLX5. In addition, few cells were OLIG2<sup>+</sup> only, suggesting minimum  
303 contamination from OPCs or oligodendrocytes.

304 Having validated our isolation strategy, we allowed cells to spontaneously differentiate without  
305 growth factor supplement for 14 days and performed single-cell RNA-sequencing (scRNA-seq)  
306 at DIV0, 7, and 14 to track their differentiation (Extended Data Fig. 11g–j). The scRNA-seq data  
307 revealed a total of ten distinct cell types (Extended Data Fig. 11j,k, Methods). In the UMAP  
308 space, cells clustered according to the stage of differentiation, the seeding cell type, and their  
309 identity (Extended Data Fig. 11h–j). Data from DIV0 reaffirmed the identities of the sorted cells  
310 (Fig. 4c, Extended Data Fig. 11l). On DIV7, three different types of descendants emerged in the  
311 IPC-Glia culture—astrocytes (9.4%), OPCs (1.1%), and a notable population of IN lineage cells,  
312 namely *DLX5*<sup>+</sup>*BEST3*<sup>+</sup> IPC-INs (26.2%) and *DLX5*<sup>+</sup>*BEST3*<sup>-</sup> INs (19.9%) (Fig. 4c, Extended  
313 Data Fig. 11l). We hence renamed IPC-Glia as Tri-IPC to highlight their tripotency. The  
314 relatively low proportion of OPCs observed (1.1% on DIV7 and 1.8% on DIV14) could be  
315 attributed to the absence of specific growth factors required for their survival. In contrast, both  
316 RG-tRGs and RG-oRGs differentiated into IPC-ENs at DIV7 and further into ENs by DIV14,  
317 indicating their continued production of ENs into the late second trimester (Fig. 4c, Extended  
318 Data Fig. 11l). Interestingly, Tri-IPCs emerged in both the RG-tRG and RG-oRG cultures by  
319 DIV7 (3.0% and 6.3%), along with a small proportion of IPC-INs (1.0% and 3.0%) but not INs  
320 (0.1% and 0.2%). By DIV14, astrocytes (0.7% and 1.8%), OPCs (1.5% and 1.8%), and INs  
321 (5.4% and 9.1%) were all present (Fig. 4c, Extended Data Fig. 11l). The delayed appearance of

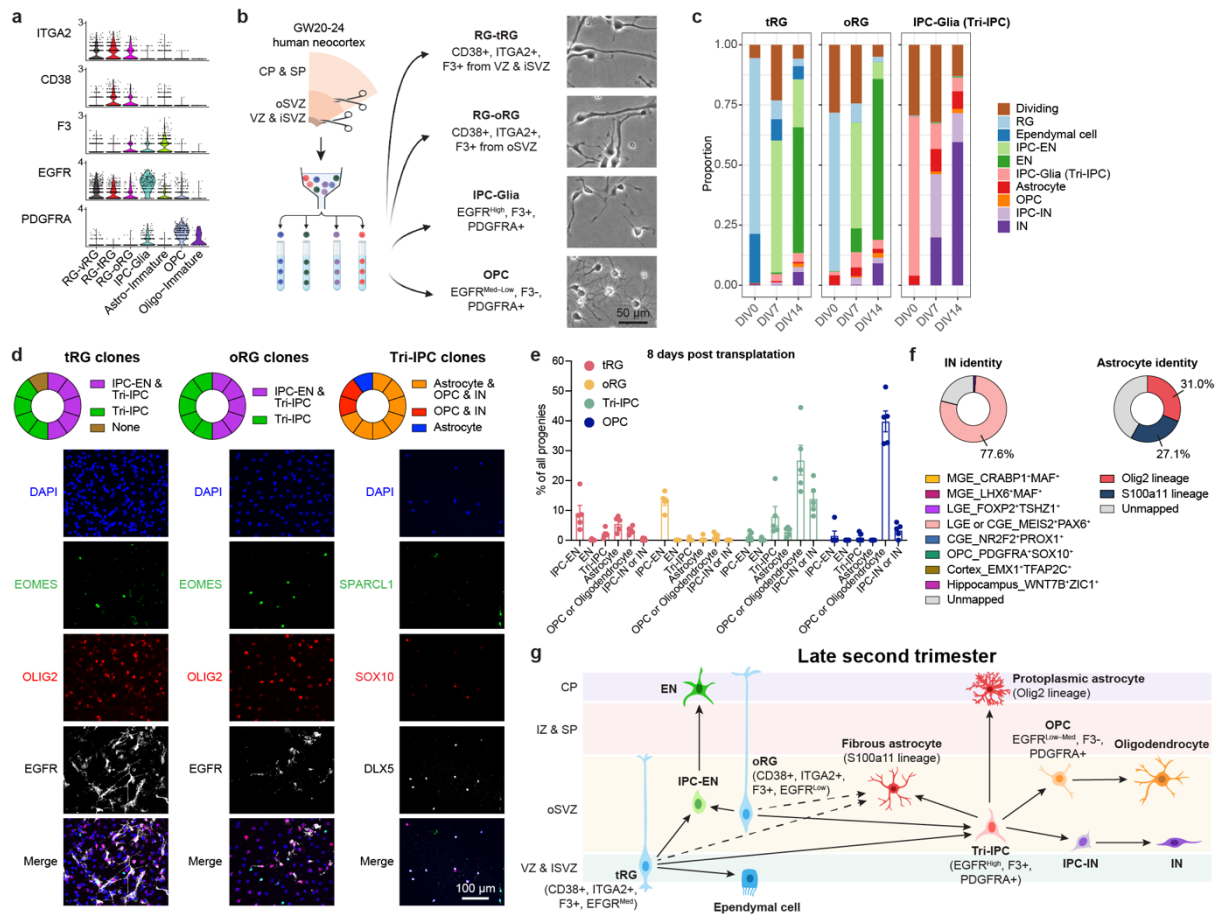

**Fig. 4 | Multipotent progenitors during transition from neurogenesis to gliogenesis.** **a**, Violin plots showing the expression patterns of surface proteins used for progenitor isolation. **b**, Left, schematic diagram showing the sorting strategy for isolation of progenitor subtypes. Right, phase-contrast images of progenitor subtypes after five days in culture. VZ & iSVZ, ventricular zone and inner subventricular zone; oSVZ, outer subventricular zone; CP & SP, cortical plate and subplate. **c**, Proportion of individual cell types across progenitor subtypes and differentiation stages. **d**, Clonal analysis demonstrating multipotency of individual progenitor cells ( $n = 10, 10, 10$  clones). **e**, Quantification of progeny types after progenitor transplantation to acute cortical slices ( $n = 5, 5, 5, 5$  samples), including IPC-EN (EOMES<sup>+</sup>), EN (NeuN<sup>+</sup>), Tri-IPC (OLIG2<sup>+</sup>EGFR<sup>+</sup>), astrocyte (SPARCL1<sup>+</sup>), OPC or oligodendrocyte (OLIG2<sup>+</sup>EGFR<sup>+</sup>), and IPC-IN or IN (DLX5<sup>+</sup>). **f**, Prediction of identities of interneurons (INs) and astrocytes derived from Tri-IPCs. **g**, Graphical summary of cell lineage relationships in late second-trimester human neocortex.

322 INs from RG cultures was consistent with our recent report that oRGs can produce INs<sup>43</sup>, but  
 323 provided additional evidence that they do so indirectly through Tri-IPCs. Immunostaining further  
 324 validated these results (Extended Data Fig. 12a–f).

325 The lineage tracing experiments described so far were conducted at the population level. To  
 326 assess the lineage potential of glial progenitors at the single-cell level, we isolated individual  
 327 RG-tRGs, RG-oRGs, and Tri-IPCs and cultured them for 14 days to produce clonal descendants.  
 328 For both RG-tRGs and RG-oRGs, 5 out of 10 clones contained both IPC-ENs and Tri-IPCs,  
 329 illustrating that individual RGs can generate both cell types (Fig. 4d). Moreover, 7 out of 10 Tri-  
 330 IPC clones contained astrocytes, OPCs, and INs, confirming the tripotential nature of individual  
 331 Tri-IPCs (Fig. 4d). Additionally, we transplanted isolated glial progenitors onto cultured human  
 332 cortical slices *ex vivo* to provide a more physiologically relevant environment (Extended Data

333 Fig. 12g). Consistent with our in vitro findings, RGs predominantly produced IPC-ENs within 8  
334 days, whereas Tri-IPCs produced astrocytes, OPCs, and INs (Fig. 4f, Extended Data Fig. 12h–j).

335 To determine the specific subtype of INs produced by Tri-IPCs, we obtained scRNA-seq data  
336 from human ganglionic eminence as a reference<sup>44</sup> and annotated interneuron subtypes based on  
337 marker genes reported in the literature<sup>45</sup> (Extended Data Fig. 13a,b). We then trained a random-  
338 forest-based classifier using SingleCellNet<sup>46</sup> based on this reference dataset, revealing that INs  
339 derived from Tri-IPCs closely resembled *MEIS2*<sup>+</sup>*PAX6*<sup>+</sup> INs from dLGE and CGE (Fig. 4f).  
340 These cells were also *SP8*<sup>+</sup>*SCGN*<sup>+</sup> and were projected to develop into olfactory bulb interneurons  
341 and white matter interneurons<sup>45</sup>. This aligns with the presence of Tri-IPCs and IN-dLGE-  
342 Immatures in the white matter of both prenatal and postnatal human telencephalon observed in  
343 our MERFISH data (Extended Data Fig. 5a–f) and suggests that some of these IN-dLGE-  
344 Immatures may originate from Tri-IPCs. Similar results were obtained with a nearest-neighbor-  
345 based label transfer approach using Seurat (Fig. 4f, Extended Data Fig. 13c,d). Additionally, we  
346 aimed to categorize the types of astrocytes derived from Tri-IPCs. A recent study delineated two  
347 lineage origins of astrocytes in the mouse neocortex—an *Olig2* lineage primarily producing gray  
348 matter or protoplasmic astrocytes and an *S100a11* lineage primarily producing white matter or  
349 fibrous astrocytes<sup>47</sup>. We applied similar classification analysis using scRNA-seq data from the  
350 developing mouse neocortex<sup>48</sup> and human snMultiome data from this study as references  
351 (Extended Data Fig. 13e,f,i,j). We found that Tri-IPC-derived astrocytes were mapped to both  
352 *Olig2* and *S100a11* lineages, indicating their potential to produce both protoplasmic and fibrous  
353 astrocytes (Fig. 4f, Extended Data Fig. 13g,h,k,l). Based on these results, we propose an updated  
354 model of the origin and lineage potential of human neural progenitors in the late second trimester  
355 (Fig. 4g).

### 356 ***Cell type relevance to human cognition and brain disorders***

357 Approximately 90% of variants identified in genome-wide association studies (GWASs) were  
358 found within non-protein-coding regions of the genome<sup>49,50</sup>. Leveraging the chromatin  
359 accessibility data we obtained from the developing human neocortex, we applied SCAVENGE<sup>51</sup>  
360 to map GWAS variants to their relevant cellular context at single-cell resolution. Specifically, the  
361 algorithm quantifies the enrichment of GWAS variants within the open chromatin regions of a  
362 cell and overcomes the sparsity issue of single-cell profiles via network propagation. The  
363 enrichment strength was quantified by trait-relevance scores (TRSs) at the single-cell level and  
364 the proportion of significantly enriched cells at the cell-group level. Using this approach, we  
365 analyzed four cognitive traits and five neuropsychiatric disorders, revealing that they all had  
366 significant associations with specific cell types (Fig. 5a–c, Supplementary Table 17). Concerning  
367 cognitive traits, we found that fluid intelligence and processing speed were associated with IT  
368 neurons, aligning with previous results in the adult human brain (Fig. 5a,c)<sup>34</sup>. In addition, we  
369 were surprised to observe an association between RGs and executive function and between  
370 microglia and working memory (Fig. 5a,c). The exact mechanisms underlying these associations  
371 remain to be elucidated. Regarding psychiatric disorders, all exhibited significant associations  
372 with various types of ENs (Fig. 5b,c). Bipolar disorder (BPD), schizophrenia (SCZ), and  
373 attention-deficit/hyperactivity disorder (ADHD), but not autism spectrum disorder (ASD) or  
374 major depressive disorder (MDD), were additionally linked to INs (Fig. 5b,c), highlighting  
375 differential disease association between the two major neuronal subclasses. Notably, some of the  
376 strongest associations were found between ASD and specific IT types (EN-IT-Immatures and  
377 EN-L6-ITs). As a control, we evaluated the association between neocortical cell types and

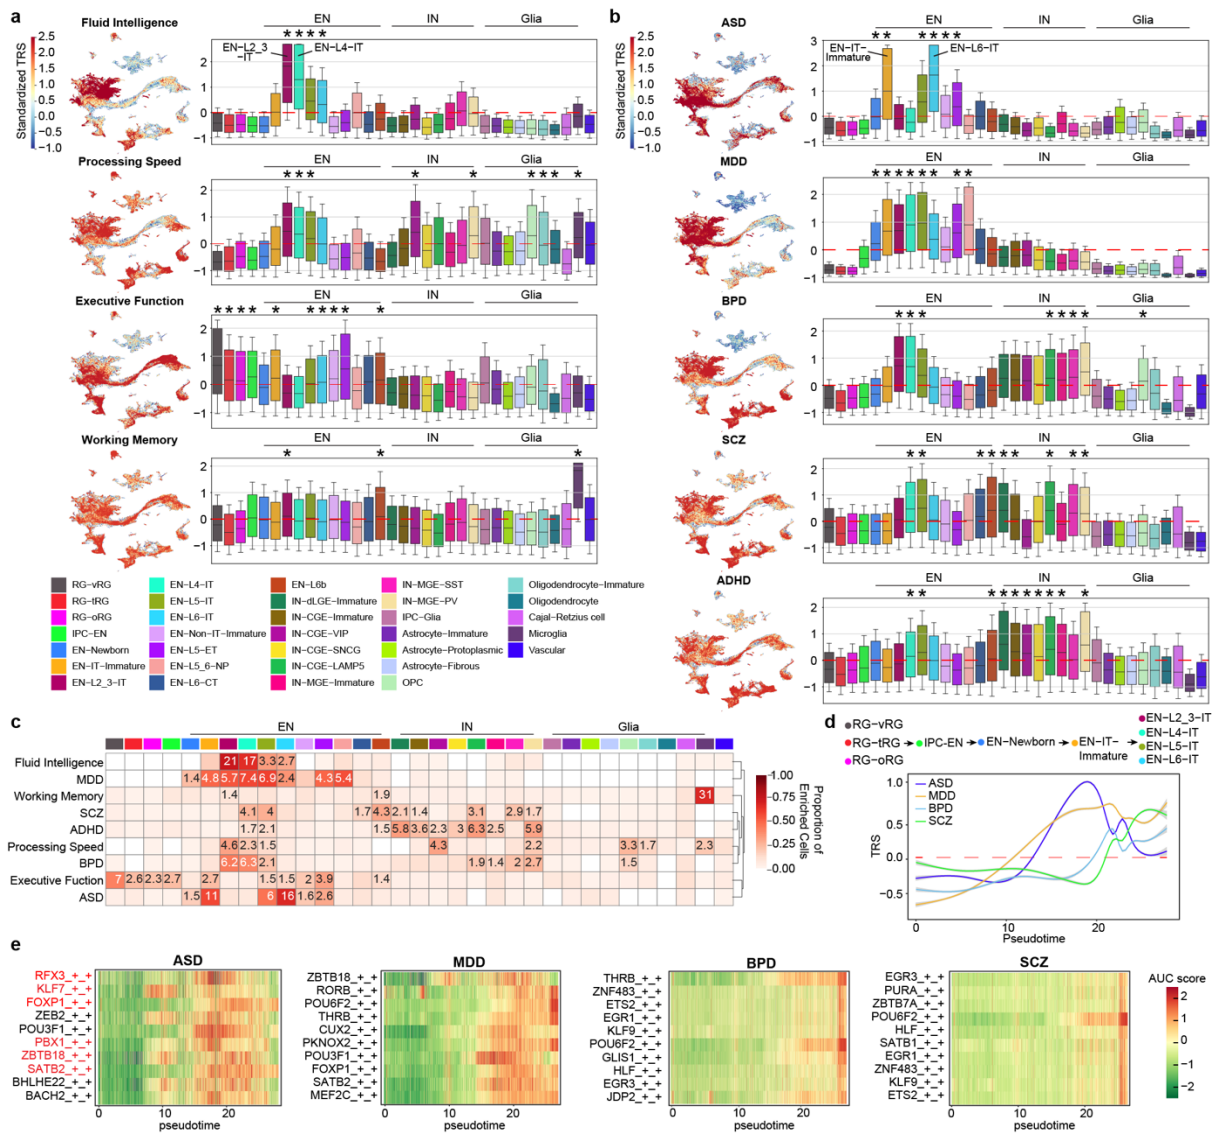

**Fig. 5. | Cell type association with human cognition and brain disorders.** **a**, Standardized per-cell SCAVENGE trait relevance score (TRS) for four cognitive functions. Boxplot center: median; hinges: the 25th and 75th percentiles; whiskers: standard error. **b**, Standardized per-cell SCAVENGE TRS for five brain disorders, including autism spectrum disorder (ASD), major depressive disorder (MDD), bipolar disorder (BPD), attention-deficit/hyperactivity disorder (ADHD), and schizophrenia (SCZ). Boxplot center: median; hinges: the 25th and 75th percentiles; whiskers: standard error. Hypergeometric test, \*FDR < 0.01 & odds ratio > 1.4. **c**, Heatmap showing the proportion of the cells with enriched trait relevance across cell types. Tiles with significant TRS enrichment (hypergeometric test, \*FDR < 0.01 & odds ratio > 1.4) are annotated by their odd ratios. **d**, Standardized SCAVENGE TRS of four brain disorders plotted along the intratentorial (IT) neuron lineage pseudotime. The best-fitted smoothed lines indicate the average TRS and the 95% confidence interval in each pseudo-time bin. **e**, Heatmaps of standardized gene-based AUC scores for top ten disease-relevant eRegulons ranked by Spearman's  $\rho$  along the IT neuron lineage pseudotime. eRegulons with SFARI ASD-associated genes as core TFs are highlighted in red.

378 Alzheimer's disease, which is known to have a strong heritability component in microglia<sup>52,53</sup>.  
 379 We not only observed the strongest enrichment of Alzheimer's disease-associated variants in  
 380 microglia but also identified significant enrichment in vascular cells and astrocytes (Extended  
 381 Data Fig. 14a,b), consistent with their involvement in the disease<sup>54,55</sup>. It is important to note that



382 our analysis was based on common variants and may not uncover contributions from other cell  
383 types due to the involvement of rare variants or environmental factors.

384 Besides cell types, we also compared trait associations among brain regions and age groups,  
385 revealing that differences between age groups were more pronounced than between regions  
386 (Extended Data Fig. 14c–f, Supplementary Table 18). For example, risk variants associated with  
387 neuropsychiatric disorders displayed distinct patterns of enrichment across age groups, with ASD  
388 risk enrichment peaking in the second trimester (Extended Data Fig. 14e–f). Given the  
389 predominant enrichment of these risk variants in ENs (Fig. 5b,c), we postulated that they target  
390 distinct stages of EN differentiation and maturation. To test this hypothesis, we selected EN  
391 lineage cells and examined the patterns of TRSs along their pseudotime (Fig. 5d). Indeed, ASD  
392 showed the earliest TRS peak, followed by MDD, BPD, and SCZ. This pattern is consistent with  
393 the earlier onset of ASD compared to other disorders and explains why previous heritability  
394 analyses of ASD in the adult brain found only a modest signal in ENs<sup>34</sup>. To pinpoint potential  
395 gene regulatory networks disrupted by disease risk variants during EN differentiation, we  
396 identified eRegulons whose activity positively correlated with the TRSs for each disorder (Fig.  
397 5e, Supplementary Table 19). Among the core TFs of the top ten eRegulons correlated with ASD,  
398 six were recognized as ASD risk genes and listed in the SFARI gene database<sup>56</sup>. Together, our  
399 analysis not only pinpointed the most relevant cell types and developmental stages for cognitive  
400 traits and brain disorders but also elucidated potential disease mechanisms at cellular and  
401 molecular levels.

## 402 Discussion

403 In this study, we extensively characterized the developing human neocortex in multiple stages,  
404 regions, and across multiple dimensions, including transcriptomic, epigenomic, spatial, and  
405 functional analyses. These data collectively establish an atlas of the human neocortex in various  
406 developmental stages at single-cell resolution. The integration of multi-omic data has provided  
407 insights into diverse aspects, including cellular composition, spatial organization, gene regulatory  
408 networks, lineage potential, and susceptibility to diseases during brain development. By  
409 combining spatial and snMultiome data, we further elucidate intricate cell-cell communication  
410 networks during development, emphasizing robust interactions between EN and IN subclasses  
411 mediated by specific signaling pathways.

412 V1 in humans, primates, and other binocular mammals exhibits a specialized cytoarchitecture  
413 characterized by an enlarged layer 4 that receives inputs from the thalamus<sup>57</sup>. Recent brain cell  
414 census studies in humans and non-human primates have identified a distinct population of EN-  
415 L4-ITs exclusively present in V1<sup>19,58</sup>. However, the mechanisms responsible for their emergence  
416 and the factors determining their identity have been unknown. Our results suggest that common  
417 and V1-specific EN-L4-ITs initially share a common developmental trajectory until the third  
418 trimester, after which they diverge. Common EN-L4-ITs follow a trajectory similar to that of  
419 EN-L5-IT, whereas V1-specific EN-L4-ITs partially share a trajectory with EN-L2\_3-IT.  
420 Furthermore, we have identified TFs and eRegulons responsible for V1-specific EN-L4-ITs  
421 differentiation, including *SMAD3*, *GLIS3*, and *CUX2* at early stages, as well as *POU6F2*, *JDP2*,  
422 and *CUX1* at later stages. These results elucidate genetic programs governing sequential neuronal  
423 fate determination. They also offer crucial insights and serve as a benchmark for the future  
424 development of area-specific in vitro models of human cortical development.



425 Previous studies in rodents have demonstrated that following the peak neurogenesis of ENs, RGs  
426 within the dorsal telencephalon gradually transition to gliogenesis. Concurrently, they begin  
427 transitioning into a specific subtype of adult VZ/SVZ stem cells that produces olfactory bulb  
428 interneurons<sup>59–61</sup>. In humans and other non-human primates, however, a longstanding debate  
429 persists concerning two fundamental questions: firstly, whether cortical progenitors, particularly  
430 cortical RGs, have the capacity to generate INs during embryonic development, and secondly,  
431 what subtype of neurons these INs eventually mature into<sup>62–66</sup>. Regarding the first question, most  
432 evidence supporting the “local production” hypothesis focuses primarily on identifying IN  
433 progenitors in the cortex, albeit failing to conclusively rule out the possibility that these IN  
434 progenitors originate in the ventral telencephalon<sup>67</sup>. Recently, we and others have demonstrated  
435 that cortical RGs in the second trimester can produce LGE- and CGE-like INs that share a  
436 lineage with ENs<sup>43,68</sup>. However, whether these INs are generated directly from RGs or indirectly  
437 via IPCs remained uncertain. In this study, we observed that both oRGs and tRGs give rise to INs  
438 through tripotential IPCs, which we named Tri-IPCs. Based on the expression of EGFR and  
439 OLIG2, human Tri-IPCs likely correspond to “MIPCs” found in mice<sup>42</sup> and proposed in  
440 humans<sup>38</sup>. The onset of Tri-IPC production occurs in the late second trimester (after gestational  
441 week 18), potentially due to increased sonic hedgehog signaling during later stages of cortical  
442 development<sup>69–71</sup>. These findings provide an explanation for the limited production of INs  
443 observed in short-term cultures of human organotypic slices before gestational week 18<sup>64</sup>.

444 Concerning the identity of INs born in the cortex, our classification suggests that the vast  
445 majority of Tri-IPC-derived INs are transcriptomically similar to *MEIS2*<sup>+</sup>*PAX6*<sup>+</sup> INs presumed to  
446 originate from the dLGE<sup>45</sup>. Interestingly, these INs are also found in scRNA-seq data from the  
447 CGE<sup>44</sup>, consistent with that *MEIS2*<sup>+</sup> cells have been observed in the CGE<sup>72</sup>. Moreover,  
448 *MEIS2*<sup>+</sup>*PAX6*<sup>+</sup> INs emerge in dorsally patterned human cerebral organoids, particularly at their  
449 later developmental stages<sup>43</sup>. Thus, instead of an IN type whose origin is confined to the LGE,  
450 we propose that *MEIS2*<sup>+</sup>*PAX6*<sup>+</sup> INs represent the most dorsal type of IN generated within the  
451 germinal zone of the cortex and its neighboring ganglionic eminence. In mice, INs derived from  
452 MIPCs were reported to differentiate into olfactory bulb interneurons<sup>42</sup>. However, our spatial  
453 transcriptomic data demonstrate the presence of *MEIS2*<sup>+</sup>*PAX6*<sup>+</sup> INs in the white matter of both  
454 prenatal and postnatal human brain, indicating their potential role as white matter interneurons.  
455 With recent reports of a shared origin between some cortical interneurons and ENs<sup>73,74</sup>, it  
456 remains to be determined whether INs derived from Tri-IPCs also differentiate into cortical  
457 interneurons.

458 Most genetic risk for ASD comes from common variants found in non-coding regions of the  
459 genome<sup>75</sup>. However, understanding the underlying cellular and molecular mechanisms has  
460 remained challenging due to a lack of comprehensive cell-type-resolved epigenomic data from  
461 the developing human brain. Our variant mapping at single-cell resolution reveals pronounced  
462 enrichment of ASD-linked common risk variants within chromatin-accessible regions specific to  
463 IT neurons in the second trimester, aligning with ASD as a neurodevelopmental disorder  
464 primarily originating at midgestation. The relevance of midgestational cortical development to  
465 ASD is further supported by data from gene expression analysis of both common and rare de  
466 novo ASD variants<sup>76–78</sup>. Moreover, our analyses indicate that disrupting cortical-cortical  
467 connectivity, particularly by impacting IT neurons in early development, may contribute to ASD  
468 pathophysiology. Notably, EN-IT-Immatures in the second trimester differentiate predominantly  
469 into EN-L2\_3-ITs and EN-L4-ITs postnatally. Intriguingly, EN-L2\_3-ITs and EN-L4-ITs are  
470 among the most affected cell types in post-mortem ASD brain<sup>79</sup>, highlighting how early-acting

471 ASD risk variants cascade into postnatal deficits within IT neurons. Our analysis extends beyond  
472 ASD and reveals temporal- and cell-type-specific risk patterns associated with multiple brain  
473 disorders. For example, ASD exhibits the earliest risk, succeeded by MDD, and then followed by  
474 BPD and SCZ. Moreover, BPD, SCZ, and ADHD, but not ASD or MDD, were linked to  
475 inhibitory neurons. These findings underscore the significance of studying the typical trajectory  
476 of brain development in understanding the deviations leading to specific diseases.

## 477 Reference

- 478 1. Molnár, Z. *et al.* New insights into the development of the human cerebral cortex. *J Anat*  
479 **235**, 432–451 (2019).
- 480 2. Long, H. K., Prescott, S. L. & Wysocka, J. Ever-Changing Landscapes: Transcriptional  
481 Enhancers in Development and Evolution. *Cell* **167**, 1170–1187 (2016).
- 482 3. Nowakowski, T. J. *et al.* Spatiotemporal gene expression trajectories reveal  
483 developmental hierarchies of the human cortex. *Science* **358**, 1318–1323 (2017).
- 484 4. Zhong, S. *et al.* A single-cell RNA-seq survey of the developmental landscape of the  
485 human prefrontal cortex. *Nature* **555**, 524–528 (2018).
- 486 5. Li, M. *et al.* Integrative functional genomic analysis of human brain development and  
487 neuropsychiatric risks. *Science* **362**, eaat7615 (2018).
- 488 6. Polioudakis, D. *et al.* A Single-Cell Transcriptomic Atlas of Human Neocortical  
489 Development during Mid-gestation. *Neuron* **103**, 785-801.e8 (2019).
- 490 7. Fan, X. *et al.* Single-cell transcriptome analysis reveals cell lineage specification in  
491 temporal-spatial patterns in human cortical development. *Sci Adv* **6**, eaaz2978 (2020).
- 492 8. Eze, U. C., Bhaduri, A., Haeussler, M., Nowakowski, T. J. & Kriegstein, A. R. Single-cell atlas  
493 of early human brain development highlights heterogeneity of human neuroepithelial  
494 cells and early radial glia. *Nat Neurosci* **24**, 584–594 (2021).
- 495 9. Bhaduri, A. *et al.* An atlas of cortical arealization identifies dynamic molecular signatures.  
496 *Nature* **598**, 200–204 (2021).
- 497 10. Braun, E. *et al.* Comprehensive cell atlas of the first-trimester developing human brain.  
498 *Science* **382**, eadf1226 (2023).
- 499 11. Velmeshev, D. *et al.* Single-cell analysis of prenatal and postnatal human cortical  
500 development. *Science* **382**, eadf0834 (2023).
- 501 12. Ramos, S. I. *et al.* An atlas of late prenatal human neurodevelopment resolved by single-  
502 nucleus transcriptomics. *Nat Commun* **13**, 7671 (2022).
- 503 13. Li, Y. *et al.* Spatiotemporal transcriptome atlas reveals the regional specification of the  
504 developing human brain. *Cell* **186**, 5892-5909.e22 (2023).
- 505 14. Ziffra, R. S. *et al.* Single-cell epigenomics reveals mechanisms of human cortical  
506 development. *Nature* **598**, 205–213 (2021).
- 507 15. Trevino, A. E. *et al.* Chromatin and gene-regulatory dynamics of the developing human  
508 cerebral cortex at single-cell resolution. *Cell* **184**, 5053-5069.e23 (2021).
- 509 16. van Bruggen, D. *et al.* Developmental landscape of human forebrain at a single-cell level  
510 identifies early waves of oligodendrogenesis. *Dev Cell* **57**, 1421-1436.e5 (2022).
- 511 17. Zhu, K. *et al.* Multi-omic profiling of the developing human cerebral cortex at the single-  
512 cell level. *Sci Adv* **9**, eadg3754 (2023).
- 513 18. Hao, Y. *et al.* Integrated analysis of multimodal single-cell data. *Cell* **184**, 3573-3587.e29  
514 (2021).
- 515 19. Jorstad, N. L. *et al.* Transcriptomic cytoarchitecture reveals principles of human neocortex  
516 organization. *Science* **382**, eadf6812 (2023).
- 517 20. Bishop, K. M., Goudreau, G. & O’Leary, D. D. M. Regulation of area identity in the  
518 mammalian neocortex by *Emx2* and *Pax6*. *Science* **288**, 344–349 (2000).

- 519 21. Chen, K. H., Boettiger, A. N., Moffitt, J. R., Wang, S. & Zhuang, X. Spatially resolved, highly  
520 multiplexed RNA profiling in single cells. *Science* **348**, aaa6090 (2015).
- 521 22. Lim, L., Mi, D., Llorca, A. & Marín, O. Development and Functional Diversification of  
522 Cortical Interneurons. *Neuron* **100**, 294–313 (2018).
- 523 23. Stenman, J., Toresson, H. & Campbell, K. Identification of Two Distinct Progenitor  
524 Populations in the Lateral Ganglionic Eminence: Implications for Striatal and Olfactory  
525 Bulb Neurogenesis. *Journal of Neuroscience* **23**, 167–174 (2003).
- 526 24. Akay, L. A., Effenberger, A. H. & Tsai, L. H. Cell of all trades: oligodendrocyte precursor  
527 cells in synaptic, vascular, and immune function. *Genes Dev* **35**, 180–198 (2021).
- 528 25. Mittelbronn, M., Dietz, K., Schluesener, H. J. & Meyermann, R. Local distribution of  
529 microglia in the normal adult human central nervous system differs by up to one order of  
530 magnitude. *Acta Neuropathol* **101**, 249–255 (2001).
- 531 26. Kriegstein, A. & Alvarez-Buylla, A. The Glial Nature of Embryonic and Adult Neural Stem  
532 Cells. *Annu Rev Neurosci* **32**, 149–184 (2009).
- 533 27. Brill, M. S. *et al.* Adult generation of glutamatergic olfactory bulb interneurons. *Nature*  
534 *Neuroscience* 2009 12:12 **12**, 1524–1533 (2009).
- 535 28. Fischer, D. S., Schaar, A. C. & Theis, F. J. Modeling intercellular communication in tissues  
536 using spatial graphs of cells. *Nature Biotechnology* 2022 41:3 **41**, 332–336 (2022).
- 537 29. Jin, S. *et al.* Inference and analysis of cell-cell communication using CellChat. *Nat*  
538 *Commun* **12**, 1–20 (2021).
- 539 30. Bravo González-Blas, C. *et al.* SCENIC+: single-cell multiomic inference of enhancers and  
540 gene regulatory networks. *Nature Methods* 2023 20:9 **20**, 1355–1367 (2023).
- 541 31. Aibar, S. *et al.* SCENIC: Single-cell regulatory network inference and clustering. *Nat*  
542 *Methods* **14**, 1083–1086 (2017).
- 543 32. Street, K. *et al.* Slingshot: Cell lineage and pseudotime inference for single-cell  
544 transcriptomics. *BMC Genomics* **19**, 1–16 (2018).
- 545 33. Van den Berge, K. *et al.* Trajectory-based differential expression analysis for single-cell  
546 sequencing data. *Nat Commun* **11**, 1–13 (2020).
- 547 34. Li, Y. E. *et al.* A comparative atlas of single-cell chromatin accessibility in the human brain.  
548 *Science* **382**, eadf7044 (2023).
- 549 35. Cadwell, C. R., Bhaduri, A., Mostajo-Radji, M. A., Keefe, M. G. & Nowakowski, T. J.  
550 Development and Arealization of the Cerebral Cortex. *Neuron* **103**, 980–1004 (2019).
- 551 36. Huang, W. *et al.* Origins and Proliferative States of Human Oligodendrocyte Precursor  
552 Cells. *Cell* **182**, 594-608.e11 (2020).
- 553 37. Fu, Y. *et al.* Heterogeneity of glial progenitor cells during the neurogenesis-to-gliogenesis  
554 switch in the developing human cerebral cortex. *Cell Rep* **34**, 108788 (2021).
- 555 38. Yang, L., Li, Z., Liu, G., Li, X. & Yang, Z. Developmental Origins of Human Cortical  
556 Oligodendrocytes and Astrocytes. *Neurosci Bull* **38**, 47–68 (2022).
- 557 39. Liu, D. D. *et al.* Purification and characterization of human neural stem and progenitor  
558 cells. *Cell* **186**, 1179-1194.e15 (2023).
- 559 40. Weng, Q. *et al.* Single-Cell Transcriptomics Uncovers Glial Progenitor Diversity and Cell  
560 Fate Determinants during Development and Gliomagenesis. *Cell Stem Cell* **24**, 707-723.e8  
561 (2019).

- 562 41. Zhang, Y. *et al.* Cortical Neural Stem Cell Lineage Progression Is Regulated by Extrinsic  
563 Signaling Molecule Sonic Hedgehog. *Cell Rep* **30**, 4490-4504.e4 (2020).
- 564 42. Li, X. *et al.* Decoding Cortical Glial Cell Development. *Neurosci Bull* **37**, 440–460 (2021).
- 565 43. Andrews, M. G. *et al.* LIF signaling regulates outer radial glial to interneuron fate during  
566 human cortical development. *Cell Stem Cell* **30**, 1382-1391.e5 (2023).
- 567 44. Shi, Y. *et al.* Mouse and human share conserved transcriptional programs for interneuron  
568 development. *Science* **374**, eabj6641 (2021).
- 569 45. Schmitz, M. T. *et al.* The development and evolution of inhibitory neurons in primate  
570 cerebrum. *Nature* **603**, 871–877 (2022).
- 571 46. Tan, Y. & Cahan, P. SingleCellNet: A Computational Tool to Classify Single Cell RNA-Seq  
572 Data Across Platforms and Across Species. *Cell Syst* **9**, 207-213.e2 (2019).
- 573 47. Zhou, J. *et al.* Dual lineage origins of neocortical astrocytes. *bioRxiv* 2023.09.12.557313  
574 (2023) doi:10.1101/2023.09.12.557313.
- 575 48. Di Bella, D. J. *et al.* Molecular logic of cellular diversification in the mouse cerebral cortex.  
576 *Nature* **595**, 554–559 (2021).
- 577 49. Edwards, S. L., Beesley, J., French, J. D. & Dunning, M. Beyond GWASs: Illuminating the  
578 Dark Road from Association to Function. *The American Journal of Human Genetics* **93**,  
579 779–797 (2013).
- 580 50. Finucane, H. K. *et al.* Partitioning heritability by functional annotation using genome-wide  
581 association summary statistics. *Nature Genetics* 2015 47:11 **47**, 1228–1235 (2015).
- 582 51. Yu, F. *et al.* Variant to function mapping at single-cell resolution through network  
583 propagation. *Nature Biotechnology* 2022 40:11 **40**, 1644–1653 (2022).
- 584 52. Nott, A. *et al.* Brain cell type–specific enhancer–promoter interactome maps and disease-  
585 risk association. *Science* **366**, 1134–1139 (2019).
- 586 53. Corces, M. R. *et al.* Single-cell epigenomic analyses implicate candidate causal variants at  
587 inherited risk loci for Alzheimer’s and Parkinson’s diseases. *Nat Genet* **52**, 1158–1168  
588 (2020).
- 589 54. Yang, A. C. *et al.* A human brain vascular atlas reveals diverse mediators of Alzheimer’s  
590 risk. *Nature* **603**, 885–892 (2022).
- 591 55. Arranz, A. M. & De Strooper, B. The role of astroglia in Alzheimer’s disease:  
592 pathophysiology and clinical implications. *Lancet Neurol* **18**, 406–414 (2019).
- 593 56. Abrahams, B. S. *et al.* SFARI Gene 2.0: A community-driven knowledgebase for the autism  
594 spectrum disorders (ASDs). *Mol Autism* **4**, 1–3 (2013).
- 595 57. Harumi Yabuta, N. & Callaway, E. M. Functional Streams and Local Connections of Layer  
596 4C Neurons in Primary Visual Cortex of the Macaque Monkey. *Journal of Neuroscience* **18**,  
597 9489–9499 (1998).
- 598 58. Krienen, F. M. *et al.* A marmoset brain cell census reveals regional specialization of  
599 cellular identities. *Sci Adv* **9**, eadk3986 (2023).
- 600 59. Kohwi, M. *et al.* A Subpopulation of Olfactory Bulb GABAergic Interneurons Is Derived  
601 from Emx1- and Dlx5/6-Expressing Progenitors. *Journal of Neuroscience* **27**, 6878–6891  
602 (2007).
- 603 60. Young, K. M., Fogarty, M., Kessar, N. & Richardson, W. D. Subventricular Zone Stem Cells  
604 Are Heterogeneous with Respect to Their Embryonic Origins and Neurogenic Fates in the  
605 Adult Olfactory Bulb. *Journal of Neuroscience* **27**, 8286–8296 (2007).



- 606 61. Fuentealba, L. C. *et al.* Embryonic Origin of Postnatal Neural Stem Cells. *Cell* **161**, 1644–  
607 1655 (2015).
- 608 62. Joyce, A. *et al.* Origin of GABAergic neurons in the human neocortex. *Nature* **417**, 645–  
609 649 (2002).
- 610 63. Zecevic, N., Hu, F. & Jakovcevski, I. Interneurons in the developing human neocortex. *Dev*  
611 *Neurobiol* **71**, 18–33 (2011).
- 612 64. Hansen, D. V. *et al.* Non-epithelial stem cells and cortical interneuron production in the  
613 human ganglionic eminences. *Nat Neurosci* **16**, 1576–1587 (2013).
- 614 65. Ma, T. *et al.* Subcortical origins of human and monkey neocortical interneurons. *Nature*  
615 *Neuroscience* **2013 16:11 16**, 1588–1597 (2013).
- 616 66. Alzu'Bi, A. *et al.* The Transcription Factors COUP-TFI and COUP-TFII have Distinct Roles in  
617 Arealisation and GABAergic Interneuron Specification in the Early Human Fetal  
618 Telencephalon. *Cerebral Cortex* **27**, 4971–4987 (2017).
- 619 67. Wu, S. *et al.* Tangential migration and proliferation of intermediate progenitors of  
620 GABAergic neurons in the mouse telencephalon. *Development* **138**, 2499–2509 (2011).
- 621 68. Delgado, R. N. *et al.* Individual human cortical progenitors can produce excitatory and  
622 inhibitory neurons. *Nature* **601**, 397–403 (2021).
- 623 69. Dahmane, N. *et al.* The Sonic Hedgehog-Gli pathway regulates dorsal brain growth and  
624 tumorigenesis. *Development* **128**, 5201–5212 (2001).
- 625 70. Ortega, J. A., Radonjić, N. V. & Zecevic, N. Sonic hedgehog promotes generation and  
626 maintenance of human forebrain Olig2 progenitors. *Front Cell Neurosci* **7**, 62556 (2013).
- 627 71. Zhang, Y. *et al.* Cortical Neural Stem Cell Lineage Progression Is Regulated by Extrinsic  
628 Signaling Molecule Sonic Hedgehog. *Cell Rep* **30**, 4490–4504.e4 (2020).
- 629 72. Yu, Y. *et al.* Interneuron origin and molecular diversity in the human fetal brain. *Nat*  
630 *Neurosci* **24**, 1745–1756 (2021).
- 631 73. Chung, C. *et al.* Cell-type-resolved somatic mosaicism reveals clonal dynamics of the  
632 human forebrain. *bioRxiv* 2023.10.24.563814 (2023) doi:10.1101/2023.10.24.563814.
- 633 74. Kim, S. N. *et al.* Cell lineage analysis with somatic mutations reveals late divergence of  
634 neuronal cell types and cortical areas in human cerebral cortex. *bioRxiv*  
635 2023.11.06.565899 (2023) doi:10.1101/2023.11.06.565899.
- 636 75. Gaugler, T. *et al.* Most genetic risk for autism resides with common variation. *Nature*  
637 *Genetics* **2014 46:8 46**, 881–885 (2014).
- 638 76. Grove, J. *et al.* Identification of common genetic risk variants for autism spectrum  
639 disorder. *Nature Genetics* **2019 51:3 51**, 431–444 (2019).
- 640 77. Parikshak, N. N. *et al.* Integrative functional genomic analyses implicate specific molecular  
641 pathways and circuits in autism. *Cell* **155**, 1008 (2013).
- 642 78. Willsey, A. J. *et al.* Coexpression Networks Implicate Human Midfetal Deep Cortical  
643 Projection Neurons in the Pathogenesis of Autism. *Cell* **155**, 997–1007 (2013).
- 644 79. Velmeshev, D. *et al.* Single-cell genomics identifies cell type-specific molecular changes in  
645 autism. *Science* **364**, 685–689 (2019).
- 646 80. Wang, L. & Kriegstein, A. Nuclei Isolation from Tissue for 10x Multiome by Iodixanol.  
647 *protocol.io* (2023) doi:10.17504/PROTOCOLS.IO.EQ2LYJ3NPLX9/V1.
- 648 81. Wolock, S. L., Lopez, R. & Klein, A. M. Scrublet: Computational Identification of Cell  
649 Doublets in Single-Cell Transcriptomic Data. *Cell Syst* **8**, 281–291.e9 (2019).

- 650 82. Zhang, Y. *et al.* Model-based analysis of ChIP-Seq (MACS). *Genome Biol* **9**, R137 (2008).
- 651 83. Amemiya, H. M., Kundaje, A. & Boyle, A. P. The ENCODE Blacklist: Identification of  
652 Problematic Regions of the Genome. *Sci Rep* **9**, (2019).
- 653 84. Stuart, T., Srivastava, A., Madad, S., Lareau, C. A. & Satija, R. Single-cell chromatin state  
654 analysis with Signac. *Nature Methods* **2021 18:11 18**, 1333–1341 (2021).
- 655 85. Choudhary, S. & Satija, R. Comparison and evaluation of statistical error models for  
656 scRNA-seq. *Genome Biol* **23**, 27 (2022).
- 657 86. Butler, A., Hoffman, P., Smibert, P., Papalexi, E. & Satija, R. Integrating single-cell  
658 transcriptomic data across different conditions, technologies, and species. *Nat Biotechnol*  
659 **36**, 411–420 (2018).
- 660 87. Waltman, L. & Van Eck, N. J. A smart local moving algorithm for large-scale modularity-  
661 based community detection. *Eur Phys J B* **86**, 471 (2013).
- 662 88. Phipson, B. *et al.* propeller: testing for differences in cell type proportions in single cell  
663 data. *Bioinformatics* **38**, 4720–4726 (2022).
- 664 89. Ritchie, M. E. *et al.* limma powers differential expression analyses for RNA-sequencing  
665 and microarray studies. *Nucleic Acids Res* **43**, e47–e47 (2015).
- 666 90. Schep, A. N., Wu, B., Buenrostro, J. D. & Greenleaf, W. J. chromVAR: inferring  
667 transcription-factor-associated accessibility from single-cell epigenomic data. *Nat*  
668 *Methods* **14**, 975–978 (2017).
- 669 91. Fornes, O. *et al.* JASPAR 2020: update of the open-access database of transcription factor  
670 binding profiles. *Nucleic Acids Res* **48**, D87–D92 (2020).
- 671 92. Hao, Y. *et al.* Dictionary learning for integrative, multimodal and scalable single-cell  
672 analysis. *Nat Biotechnol* (2023) doi:10.1038/s41587-023-01767-y.
- 673 93. Nguyen, L. Van *et al.* Fast unfolding of communities in large networks. *Journal of*  
674 *Statistical Mechanics: Theory and Experiment* **2008**, P10008 (2008).
- 675 94. Palla, G. *et al.* Squidpy: a scalable framework for spatial omics analysis. *Nature Methods*  
676 **2022 19:2 19**, 171–178 (2022).
- 677 95. Hie, B., Cho, H., DeMeo, B., Bryson, B. & Berger, B. Geometric Sketching Compactly  
678 Summarizes the Single-Cell Transcriptomic Landscape. *Cell Syst* **8**, 483-493.e7 (2019).
- 679 96. Bravo González-Blas, C. *et al.* cisTopic: cis-regulatory topic modeling on single-cell ATAC-  
680 seq data. *Nat Methods* **16**, 397–400 (2019).
- 681 97. Janky, R. *et al.* iRegulon: From a Gene List to a Gene Regulatory Network Using Large  
682 Motif and Track Collections. *PLoS Comput Biol* **10**, e1003731 (2014).
- 683 98. Van de Sande, B. *et al.* A scalable SCENIC workflow for single-cell gene regulatory network  
684 analysis. *Nat Protoc* **15**, 2247–2276 (2020).
- 685 99. Scrucca, L., Fraley, C., Murphy, T. B. & Raftery, A. E. *Model-Based Clustering, Classification,*  
686 *and Density Estimation Using mclust in R. Model-Based Clustering, Classification, and*  
687 *Density Estimation Using mclust in R* (CRC Press, 2023). doi:10.1201/9781003277965.
- 688 100. Yu, G., Wang, L. G., Han, Y. & He, Q. Y. ClusterProfiler: An R package for comparing  
689 biological themes among gene clusters. *OMICS* **16**, 284–287 (2012).
- 690 101. Rivellese, F. *et al.* Rituximab versus tocilizumab in rheumatoid arthritis: synovial biopsy-  
691 based biomarker analysis of the phase 4 R4RA randomized trial. *Nat Med* **28**, 1256–1268  
692 (2022).

- 693 102. Robinson, M. D., McCarthy, D. J. & Smyth, G. K. edgeR: A Bioconductor package for  
694 differential expression analysis of digital gene expression data. *Bioinformatics* **26**, 139–  
695 140 (2009).
- 696 103. Schindelin, J. *et al.* Fiji: An open-source platform for biological-image analysis. *Nat*  
697 *Methods* **9**, 676–682 (2012).
- 698 104. Ulirsch, J. C. *et al.* Interrogation of human hematopoiesis at single-cell and single-variant  
699 resolution. *Nature Genetics* 2019 51:4 **51**, 683–693 (2019).
- 700
- 701

## 702 **Methods**

### 703 Brain tissue samples

704 Human brain tissue samples (Supplementary Table 1 and 5) were acquired from four different  
705 sources.

706 Four de-identified first-trimester human tissue samples were collected from the Human  
707 Developmental Biology Resource (HDBR), staged using crown-rump length and snap-frozen on  
708 dry ice. After tissue acquisition, the cortical plate and subplate were dissected and frozen at  $-80^{\circ}\text{C}$ .

709 Thirteen de-identified second-trimester human tissue samples were collected at the Zuckerberg  
710 San Francisco General Hospital (ZSFGH). Acquisition of second-trimester human tissue samples  
711 was approved by the UCSF Human Gamete, Embryo and Stem Cell Research Committee (study  
712 number 10-05113). All experiments were performed in accordance with protocol guidelines.  
713 Informed consent was obtained before sample collection and use for this study.

714 Two de-identified third-trimester and early postnatal tissue samples were obtained at the UCSF  
715 Pediatric Neuropathology Research Laboratory (PNRL) led by Dr. Eric Huang. These samples  
716 were acquired with patient consent in strict observance of the legal and institutional ethical  
717 regulations and in accordance with research protocols approved by the UCSF IRB committee.  
718 These samples were dissected and snap-frozen either on a cold plate placed on a slab of dry ice or  
719 in isopentane on dry ice.

720 Twenty-three de-identified third trimester, early postnatal, and adolescent tissue samples without  
721 known neurological disorders were obtained from the University of Maryland Brain and Tissue  
722 Bank through NIH NeuroBioBank.

723 Samples used for single-nucleus analysis were listed in Supplementary Table 1, and those for  
724 spatial transcriptomic analysis were listed in Supplementary Table 5.

725

### 726 Nuclei isolation and generation of single-nucleus multiome (snMultiome) data

727 Detailed protocol can be found at ref<sup>80</sup>. All procedures were done on ice or at  $4^{\circ}\text{C}$ . Briefly, frozen  
728 tissue samples (20–50 mg) were homogenized using a pre-chilled 7 ml Dounce homogenizer  
729 containing 1 ml cold homogenization buffer (HB) (20 mM Tricine-KOH pH 7.8, 250 mM  
730 sucrose, 25 mM KCl, 5 mM  $\text{MgCl}_2$ , 1 mM dithiothreitol, 0.5 mM Spermidine, 0.5 mM  
731 Spermine, 0.3% NP-40,  $1\times$  cOmplete protease inhibitor [Roche], and 0.6 U/mL RiboLock  
732 [Thermo Fisher]). The tissue samples were homogenized 10 times with the loose pestle and 15  
733 times with the tight pestle. Nuclei were pelleted by spinning at  $350\times g$  for 5 min, resuspended in  
734 25% iodixanol solution, and loaded onto 30% and 40% iodixanol layers to make a gradient. The  
735 gradient was spun at  $3,000\times g$  for 20 min. Clean nuclei were collected at the 30%–40% interface  
736 and diluted in wash buffer (10 mM Tris-HCl pH 7.4, 10 mM NaCl, 3 mM  $\text{MgCl}_2$ , 1 mM  
737 dithiothreitol, 1% BSA, 0.1% Tween 20, and 0.6 U/mL RiboLock [Thermo Fisher]). Next, nuclei  
738 were pelleted by spinning at  $500\times g$  for 5 min and resuspended in diluted nuclei buffer (10X  
739 Genomics). Nuclei were counted using a hemocytometer, diluted to 3220 nuclei/ $\mu\text{L}$ , and further  
740 processed following 10X Genomics Chromium Next GEM Single Cell Multiome ATAC + Gene  
741 Expression Reagent Kits user guide. We targeted 10,000 nuclei per sample per reaction. Libraries  
742 from individual samples were pooled and sequenced on the NovaSeq 6000 sequencing system,  
743 targeting 25,000 read pairs per nucleus for ATAC and 25,000 read pairs for RNA.

744

#### 745 snMultiome data pre-processing

746 The raw sequencing signals in the BCL format were demultiplexed into fastq format using the  
747 “mkfastq” function in the Cell Ranger ARC suite (v.2.0.0, 10x Genomics). Cell Ranger-ARC count  
748 pipeline was implemented for cell barcode calling, reads alignment, and quality assessment using  
749 the human reference genome (GRCh38) following the protocols described by 10X Genomics. The  
750 pipeline assessed the overall quality to retain all intact nuclei from the background and filtered out  
751 non-nucleus-associated reads. All gene expression libraries in this study showed a high fraction of  
752 reads in nuclei, indicating high RNA content in called nuclei and minimal levels of ambient RNA  
753 detected. The overall summary of data quality for each sample is listed in Supplementary Table 1.  
754 Next, we further assessed the data at the individual nuclei level and retained high-quality nuclei  
755 with the following criteria: (1) Gene expression count (nCount\_RNA) is in the range of 1,000 to  
756 25,000; (2) The number of detected genes (nFeature\_RNA) is greater than 400; (3) The total ATAC  
757 fragment count in the peak regions (atac\_peak\_region\_fragments) is in the range of 100 to 100,000;  
758 (4) The transcription start site (TSS) enrichment score for ATAC-seq is greater than 1; (5) The  
759 strength of nucleosome signal (the ratio of mononucleosome to nucleosome-free fragments) is  
760 below 2. To ensure only single nuclei were analyzed, we measured the doublet probability by  
761 Scrublet<sup>81</sup> and excluded all potential doublets receiving a score greater than 0.3 for downstream  
762 analyses. In total, 243,535 nuclei that passed all QC criteria were included for further analysis.

763

#### 764 snMultiome data integration, dimensionality reduction, clustering, and cell type identification

765 For ATAC data of snMultiome analysis, open chromatin region peaks were called on individual  
766 samples using MACS2 (v2.2.7)<sup>82</sup>. Peaks from all samples were unified into genomic intervals,  
767 and the intervals falling in the ENCODE blacklisted regions were excluded<sup>83</sup>. Among all 398,512  
768 processed ATAC peaks, top 20% of consensus peaks (n = 82,505) across all nuclei were selected  
769 as variable features for downstream fragment counting and data integration. The peak-by-nuclei  
770 counts for each sample were integrated by reciprocal LSI projection functions using the R  
771 package Signac (v1.10.0)<sup>84</sup>. For RNA-seq data, normalization, data scaling and, variable features  
772 detection were performed using SCTransform v2<sup>85</sup> in Seurat v4<sup>18</sup>. The cell cycle difference  
773 between the G2M and S phase for each nucleus was scored and regressed out before data  
774 integration. The transformed gene-by-nuclei data matrices for all nuclei passing quality control  
775 were integrated by reciprocal PCA projections between different samples using Seurat v4  
776 following the best practice described in Stuart et al.<sup>84</sup> and Butler et al.<sup>86</sup>.

777 Weighted nearest neighbor analysis was done using Seurat v4 with 1–50 PCA components and  
778 2–40 LSI components. The resulting nearest neighbor graph was used to perform UMAP  
779 embedding and clustering using the SLM algorithm<sup>87</sup>. Clusters with known markers expressed in  
780 the striatum (*ISL1* and *SIX3*) and diencephalon (*OTX2* and *GBX2*) were discarded. In addition,  
781 clusters with both transcripts present in neurites (*NRGN*) and oligodendrocyte processes (*MBP*),  
782 likely due to debris contamination, were discarded. These filtering steps resulted in 232,328  
783 nuclei in the final dataset (Extended Data Fig. 1, Supplementary Table 2). Weighted nearest  
784 neighbor, dimension reduction, and clustering were re-calculated using the filtered data. Cell  
785 identities were determined based on the expression of known marker genes, as is shown in  
786 Extended Data Fig. 3 and Supplementary Table 3. The 5 identified classes were progenitor,  
787 neuron, glia, immune cell, and vascular cell. The 11 identified subclasses were radial glia,



788 intermediate progenitor cell for excitatory neurons (IPC-EN), glutamatergic neuron, GABAergic  
789 neuron, intermediate progenitor cell for glia (IPC-Glia), astrocyte, oligodendrocyte precursor cell  
790 (OPC), oligodendrocyte, Cajal-Retzius cell, microglia, and vascular cell. The 33 identified cell  
791 types were ventricular radial glia (RG-vRG), truncated radial glia (RG-tRG), outer radial glia  
792 (RG-oRG), intermediate progenitor cell for excitatory neurons (IPC-EN), newborn excitatory  
793 neuron (EN-Newborn), immature intratelencephalic neuron (EN-IT-Immature), layer 2–3  
794 intratelencephalic neuron (EN-L2\_3-IT), layer 4 intratelencephalic neuron (EN-L4-IT), layer 5  
795 intratelencephalic neuron (EN-L5-IT), layer 6 intratelencephalic neuron (EN-L6-IT), immature  
796 non-intratelencephalic neuron (EN-Non-IT-Immature), layer 5 extratelencephalic neuron (EN-  
797 L5-ET), layer 5–6 near-projecting neuron (EN-L5\_6-NP), layer 6 corticothalamic neuron (EN-  
798 L6-CT), layer 6b neuron (EN-L6b), immature dorsal lateral ganglionic eminence inhibitory  
799 neuron (IN-dLGE-Immature), immature caudal ganglionic eminence inhibitory neuron (IN-  
800 CGE-Immature), VIP inhibitory neuron (IN-CGE-VIP), SNCG inhibitory neuron (IN-CGE-  
801 SNCG), LAMP5 inhibitory neuron (IN-CGE-LAMP5), immature medial ganglionic eminence  
802 inhibitory neuron (IN-MGE-Immature), SST inhibitory neuron (IN-MGE-SST), PVALB  
803 inhibitory neuron (IN-MGE-PV), intermediate progenitor cell for glia (IPC-Glia), immature  
804 astrocyte (Astrocyte-Immature), protoplasmic astrocyte (Astrocyte-Protoplasmic), fibrous  
805 astrocyte (Astrocyte-Fibrous), oligodendrocyte precursor cell (OPC), immature oligodendrocyte  
806 (Oligodendrocyte-Immature), oligodendrocyte (Oligodendrocyte), Cajal-Retzius cell, microglia  
807 (Microglia), and vascular cell (Vascular).

808

#### 809 Cell type proportion analysis

810 The investigation of variations in cell type proportions across different age groups and brain  
811 regions was conducted using a linear model approach implemented in the R packages speckle  
812 (v1.2.0)<sup>88</sup> and limma (v3.58.1)<sup>89</sup>. To determine changes in cell type proportions over time, we  
813 logit-transformed the proportions within each sample and fitted a linear model ( $\sim \log_2\_age +$   
814  $region$ ) using limma. Moreover, to address the potential correlation among samples from the  
815 same individual, the duplicateCorrelation function in limma was applied. Once the model was fit,  
816 moderated t-test with empirical Bayes shrinkage was used to test statistical significance of the  
817  $\log_2\_age$  coefficient for each cell type. To determine cell type proportion differences between  
818 PFC and V1, similar analysis was done but only samples in the third trimester and older were  
819 used. Cell types with Benjamini–Hochberg adjusted P-values  $< 0.05$  were determined significant  
820 (Supplementary Table 3).

821

#### 822 Transcription factor motif enrichment analysis

823 The per-cell regulatory activities of transcription factors (TFs) were quantified by chromVAR  
824 (v1.16.0)<sup>90</sup>. In brief, peaks were combined by removing any peaks overlapping with a peak with  
825 a greater signal, and only peaks with a width greater than 75bp were retained for motif  
826 enrichment analysis. We computed the per-cell enrichment of curated motifs from JASPAR2020  
827 database<sup>91</sup>. In total, 633 unique human transcriptional factors were assigned to their most  
828 representative motifs. The per-cell-type transcriptional activity of each TF was represented by  
829 averaging the per-cell chromVAR scores within the cell type, and the cell-type-specific TFs were  
830 chosen for further analysis and visualization (Supplementary Table 4).

831

832 Spatial transcriptomic analysis using Multiplexed Error-Robust Fluorescence in situ  
833 Hybridization (MERFISH)

834 Spatial transcriptomic analysis using MERFISH was done using the Vizgen MERSCOPE  
835 platform. We designed a customized 300-gene panel composed of cell type markers  
836 (Supplementary Table 5b) using online tools at <https://portal.vizgen.com/>. Fresh frozen human  
837 brain tissue samples were sectioned at a thickness of 10  $\mu\text{m}$  using a cryostat and mounted onto  
838 MERSCOPE slides (Vizgen). Sections were fixed with 4% formaldehyde, washed three times  
839 with PBS, photo-bleached for 3 h, and stored in 70% ethanol for up to one week. Hybridizations  
840 with gene probes were performed at 37°C for 36–48 h. Next, sections were fixed using  
841 formaldehyde and embedded in a polyacrylamide gel. After gel embedding, tissue samples were  
842 cleared using a clearing mix solution supplemented with proteinase K for 1–7 days at 37°C until  
843 no visible tissue was evident in the gel. Next, sections were stained for DAPI and PolyT and  
844 fixed with formaldehyde before imaging. The imaging process was done on the MERSCOPE  
845 platform according to the manufacturer’s instructions. Cell segmentation was done using the  
846 Watershed algorithm based on Seed Stain (DAPI) and Watershed Stain (PolyT).

847

848 MERFISH data integration, dimensionality reduction, clustering, cell type assignment, and niche  
849 analysis

850 Standard MERSCOPE output data were imported into Seurat v5<sup>92</sup>. We retained high-quality cells  
851 with the following criteria: (1) Cell volume is greater than 10  $\mu\text{m}^3$ ; (2) Gene expression count  
852 (nCount\_Vizgen) is in the range of 25 to 2,000; (3) The number of detected genes (nFeature\_  
853 Vizgen) is greater than 10. Normalization, data scaling and variable features detection were  
854 performed using SCTransform v2<sup>85</sup>. The transformed gene-by-cell data matrices for all cells  
855 passing quality control were integrated by reciprocal PCA projections between samples using 1–  
856 30 PCA components. After integration, nearest neighbor analysis was done with 1–30 PCA  
857 components. The resulting nearest neighbor graph was used to perform UMAP embedding and  
858 clustering using the Louvain algorithm<sup>93</sup>. Clusters with markers known to be mutually exclusive  
859 were deemed doublets and discarded. These filtering steps resulted in 404,030 cells in the final  
860 dataset (Supplementary Table 6). The identity of specific cell types was determined based on the  
861 expression of known marker genes, as is shown in Extended Data Fig. 4b. Niches were identified  
862 by k-means clustering cells based on the identities of their 50 nearest spatial neighbors.

863

864 Neighborhood enrichment and intercellular communication modeling

865 To evaluate the spatial proximity of cell types in each sample, we obtained a neighborhood  
866 enrichment z-score using the nhood\_enrichment function from Squidpy (v1.2.3)<sup>94</sup>. The graph  
867 neural network-based node-centric expression modeling (NCEM v0.1.4) method<sup>28</sup> was used for  
868 intercellular communication modeling (Supplementary Table 7). A node-centric linear expression  
869 analysis was implemented to predict gene expression states from both cell type annotations and  
870 the surrounding neighborhood of each cell, where dependencies between sender and receiver cell  
871 types were constrained by the connectivity graph with a mean number of neighbors around 10  
872 for each cell within each sample. One exception is that sample ARKFrozen-65-V1 was randomly  
873 downsampled to 60,000 cells to ensure it has a similar neighborhood size to other samples.

874 Significant interactions were called if the magnitude of interactions (the Euclidean norm of  
875 coefficients in the node-centric linear expression interaction model) was above 0.5 and at least 25  
876 differentially expressed genes ( $q$  value  $< 0.05$  for specific sender-receiver interaction terms) were  
877 detected. For visualization purposes, only significant interactions were plotted in circular plots.

878

### 879 Quantification of ligand-receptor (LR) communication using CellChat

880 We implemented CellChat (v1.6.1)<sup>29</sup> to quantify the strength of interactions among cell types  
881 using default parameter settings (Supplementary Table 8). After normalization, the batch-  
882 corrected gene expression data from all 232,328 nuclei were taken as the CellChat input. We  
883 considered all curated ligand-receptor pairs from CellChatDB, where higher expression of  
884 ligands or receptors in each cell type was identified to compute the probability of cell-type-  
885 specific communication at the LR pair level (refer to the original publication for details). We  
886 filtered out the cell-cell communication if less than ten cells in the outgoing or incoming cell  
887 types expressing the ligand or receptor, respectively. The computed communication network was  
888 then summarized at a signaling pathway level and was aggregated into a weighted-directed graph  
889 by summarizing the communication probability. The calculated weights represent the total  
890 interaction strength between any two cell types. The statistically significant LR communication  
891 between the two groups were determined by permutation test, where  $P$  value  $< 0.05$  is considered  
892 significant.

893

### 894 Gene regulatory network analysis

895 We implemented the SCENIC+ (v0.1.dev448+g2c0bafd) workflow<sup>30</sup> to build gene regulatory  
896 networks of developing human neocortex based on the snMultiome data. As running the  
897 workflow on all nuclei is memory intensive, we subsampled 10,000 representative nuclei by  
898 geometric sketching<sup>95</sup> to accelerate the analyses while preserving rare cell states and the overall  
899 data structure. First, MACS2 was used for consensus peak calling in each cell type<sup>82</sup>. Each peak  
900 was extended for 250bp in both directions from the summit. Next, weak peaks were removed,  
901 and the remaining peaks were summarized into a peak-by-nuclei matrix. Topic modeling was  
902 performed on the matrix by pycisTopic<sup>96</sup> using default parameters, and the optimal number of  
903 topics (48) was determined based on log-likelihood metrics. Three different methods were used  
904 in parallel to identify candidate enhancer regions: (1) Regions of interest were selected by  
905 binarizing the topics using the Otsu method; (2) Regions of interest were selected by taking the  
906 top 3,000 regions per topic; (3) Regions of interest were selected by calling differentially  
907 accessible peaks on the imputed matrix using a Wilcoxon rank sum test ( $\log_{2}FC > 0.5$  and  
908 Benjamini–Hochberg adjusted  $P$  values  $< 0.05$ ). Pycistarget and discrete element method  
909 (DEM) based motif enrichment analysis were then implemented to determine if the candidate  
910 enhancers were linked to a given TF<sup>97</sup>. Next, eRegulons, defined as TF-region-gene triplets  
911 consisting of a specific TF, all regions that are enriched for the TF-annotated motif, and all genes  
912 linked to these regions, were determined by a wrapper function provided by SCENIC+ using the  
913 default settings. We applied a standard eRegulon filtering procedure: (1) Only eRegulons with  
914 more than ten target genes and positive region-gene relationships were retained; (2) Only genes  
915 with top TF-to-gene importance scores were selected as the target genes for each eRegulon; (3)  
916 eRegulons with an extended annotation was only kept if no direct annotation is available. After  
917 filtering, 582 eRegulons were retained (Supplementary Table 9). For each retained eRegulon,

918 specificity scores were calculated using the RSS algorithm based on region- or gene-based  
919 eRegulon enrichment scores (AUC scores)<sup>98</sup> (Supplementary Table 10). eRegulons with top  
920 specificity scores in each cell type were selected for visualization. Finally, we extended our  
921 eRegulon enrichment analysis from the 10,000 sketched nuclei to all 232,328 nuclei by  
922 computing the gene-based AUC scores for all 582 eRegulons using the R package AUCCell  
923 (v1.20.2)<sup>31</sup> with default settings.

924

#### 925 Trajectory inference and trajectory-based differential expression analysis

926 Cells belonging to excitatory neuronal lineages, including radial glial cells, IPC-EN, and  
927 glutamatergic neurons, were selected from the whole dataset for trajectory inference using  
928 Slingshot (v2.6.0)<sup>32</sup>. Weighted nearest neighbor graph was re-calculated on the subset using 1–50  
929 PCA components and 2–40 LSI components. Dimension reduction was performed based on the  
930 calculated nearest neighbor graph, generating an 8-dimensional UMAP embedding. We  
931 identified 23 clusters in this UMAP space after removing one outlier cluster using mclust<sup>99</sup>.  
932 Next, we identified the global lineage structure with a cluster-based minimum spanning tree  
933 (MST). The cluster containing RG-vRG was set as the starting cluster, and those containing  
934 terminally differentiated cells were set as ending clusters (Extended Data Fig. 8a). Subsequently,  
935 we fitted nine simultaneous principal curves to describe each of the nine lineages, obtaining each  
936 cell's weight based on its projection distance to the curve representing that lineage. Pseudotimes  
937 were inferred based on the principal curves, and shrinkage was performed for each branch for  
938 better convergence (Supplementary Table 11). Finally, the principal curves in the 8-dimensional  
939 UMAP space were projected to a 2-dimensional UMAP space for visualization.

940

#### 941 Identification of eRegulon modules

942 To model the activity of eRegulons along inferred trajectories, we fitted gene-based eRegulon  
943 AUC scores against pseudotimes by a generalized additive model (GAM) using tradeSeq  
944 (v1.12.0)<sup>33</sup>. As AUC scores can be seen as proportions data on (0,1), instead of the default  
945 negative binomial GAM, we fitted a beta GAM with six knots in tradeSeq. Fitted values from the  
946 tradeSeq models were extracted using the predictSmooth function, with 100 data points along  
947 each trajectory. The oRG&tRG trajectory was removed because we focused on excitatory  
948 neuronal lineages for eRegulon analysis. Based on fitted AUC values, six eRegulon modules  
949 were identified by k-means clustering (Supplementary Table 12a).

950

#### 951 Gene ontology enrichment analysis for eRegulon modules

952 The one-sided hypergeometric test implemented in clusterProfiler v4.0.5<sup>100</sup> was used to identify  
953 overrepresented gene ontology (biological pathway) in each eRegulon module (Supplementary  
954 Table 12b). Genes present in at least 8% of all eRegulons in a module were regarded as the core  
955 target genes of that module. Module-specific core target gene sets were used as input gene sets.  
956 The union of target genes of any eRegulon was used as the background.

957

#### 958 Differential gene expression analysis between common and V1-specific EN-L4-IT



959 To identify genes differentially expressed between common and V1-specific EN-L4-IT, we first  
960 selected all EN-L4-IT nuclei and determined their subtype identity (common or V1-specific)  
961 based on markers and tissue of origin (Extended Data Fig. 9a,b). We then aggregated counts  
962 across samples and subtypes to generate pseudobulk samples. Differential gene expression  
963 analysis was done by fitting the pseudobulked count data to a generalized linear mixed model ( $\sim$   
964 subtype + log<sub>2</sub>\_age + [1 | dataset]) using the R package glmmSeq (v0.5.5)<sup>101</sup>. Size factors and  
965 dispersion were estimated using the R package edgeR (v3.42.4)<sup>102</sup>. Once the model was fit,  
966 likelihood ratio tests were used to determine statistical significance using ( $\sim$ log<sub>2</sub>\_age + [1 |  
967 dataset]) as the reduced model. Genes with Benjamini–Hochberg adjusted P-values < 0.05 were  
968 determined significant (Supplementary Table 13).

969

### 970 Identification of key eRegulons that regulate neuronal lineage divergence

971 Based on the principal curves, five bifurcation points (BPs) were identified along neuronal  
972 differentiation. To identify genes that are differentiating around a BP of the trajectory, we  
973 performed an earlyDETest using tradeSeq. Specifically, we first separated the pseudotimes into  
974 five consecutive segments (Extended Data Fig. 8g). We then compared the expression patterns of  
975 gene-based eRegulon AUCs along pseudotime between lineages by contrasting 12 equally  
976 spaced pseudotimes within segments that enclose the BP (Supplementary Table 14). We included  
977 segments 2–3 for BP1, segments 3–4 for BP2, and segments 4–5 for BP3, BP4, and BP5.

978

### 979 Isolation and in vitro culture of glial progenitors from late second-trimester human cortex

980 Glial progenitor cells were isolated from GW20–24 human dorsal cortical tissue samples. The  
981 ventricular zone/inner subventricular zone (VZ/iSVZ) and outer subventricular zone (oSVZ)  
982 were dissected and dissociated using the Papain Dissociation System (Worthington  
983 Biochemical). Dissociated cells were layered onto undiluted papain inhibitor solution  
984 (Worthington Biochemical) and spun down at  $70 \times g$  for 6 min to eliminate debris. The cell pellet  
985 was resuspended in 10 mL complete culture medium (DMEM/F12, 2 mM GlutaMAX, 2% B27  
986 without vitamin A, 1% N2, and  $1 \times$  Penicillin-Streptomycin) and incubated at 37°C for 3 h for  
987 surface antigen recovery. From this point on, cells were handled on ice or at 4°C. Cells were  
988 washed once with staining buffer (Hank's Balanced Salt Solution [HBSS] without Ca<sup>2+</sup> and  
989 Mg<sup>2+</sup>, 10 mM HEPES pH 7.4, 1% BSA, 1 mM EDTA, 2% B27 without vitamin A, 1% N2, and  $1$   
990  $\times$  Penicillin-Streptomycin), spun down at  $300 \times g$  for 5 min, and resuspended in staining buffer  
991 to a density of  $1 \times 10^8$  cells/mL. Cells were blocked by FcR Blocking Reagent (Miltenyi  
992 Biotech, 1:20) for 10 min, followed by antibody incubation for 30 min. Antibodies used for  
993 FACS include FITC anti-EGFR (Abcam, ab11400), PE anti-F3 (Biolegend, 365204), PerCP-  
994 Cy5.5 anti-CD38 (BD Biosciences, 551400), Alexa Fluor 647 anti-PDGFR $\alpha$  (BD Biosciences,  
995 562798), and PE-Cy7 anti-ITGA2 (Biolegend, 359314). All antibodies were used at 1:20  
996 dilution. After incubation, cells were washed twice in staining buffer, resuspending in staining  
997 buffer containing Sytox Blue (Invitrogen), and sorted using BD FACSAria II sorters. Cells were  
998 sorted into collection buffer (HBSS without Ca<sup>2+</sup> and Mg<sup>2+</sup>, 10 mM HEPES pH 7.4, 5% BSA,  
999 2% B27 without vitamin A, 1% N2, and  $1 \times$  Penicillin-Streptomycin). After sorting, cells were  
1000 spun down at  $300 \times g$  for 5 min, resuspended in complete culture medium, and plated onto glass  
1001 coverslips pre-coated with poly-D-lysine and laminin at a density of  $2.5 \times 10^4$  cells/cm<sup>2</sup>. Cells



1002 were cultured in a humidified incubator with 5% CO<sub>2</sub> and 8% O<sub>2</sub>. Half of the medium was  
1003 changed with fresh medium every 3–4 days until harvest at the indicated time.

1004

#### 1005 Immunostaining and confocal imaging

1006 On DIV0 and DIV14, glial progenitors or their progenies were fixed with 4% formaldehyde/4%  
1007 sucrose in PBS and permeabilized/blocked with PBS-based blocking buffer containing 10%  
1008 donkey serum, 0.2% gelatin, and 0.1% Triton X-100 at room temperature for 1 h. Samples were  
1009 then incubated with primary antibodies diluted in the blocking buffer at 4 °C overnight. The next  
1010 day, samples were washed in PBS three times and incubated with secondary antibodies in the  
1011 blocking buffer at room temperature for 1 h. Samples were then washed twice in PBS,  
1012 counterstained with DAPI, and washed in PBS again. Z-stack images were acquired with a Leica  
1013 TCS SP8 using a 25× water immersion objective. Acquired images were processed using Imaris  
1014 v9.7 (Oxford Instruments) and Fiji/ImageJ v1.54<sup>103</sup>. The following antibodies were used: TFAP2C  
1015 (R&D systems, AF5059, 1:50), CRYAB (Abcam, ab13496, 1:200), NeuN (EMD Millipore,  
1016 ABN90, 1:250), OLIG2 (Abcam, ab109186, 1:150), EGFR (abcam, ab231, 1:200), SPARCL1  
1017 (R&D systems, AF2728, 1:50), and DLX5 (Sigma, HPA005670, 1:100).

1018

#### 1019 Single-cell RNA-seq analysis of glial progenitor differentiation

1020 Glial progenitors were either immediately subjected to single-cell RNA-seq or cultured in vitro  
1021 for 7 and 14 days before single-cell RNA-seq. In the latter cases, cells were released using the  
1022 Papain Dissociation System (Worthington Biochemical) without DNase for 20 min. Released  
1023 cells were washed twice in HBSS without Ca<sup>2+</sup> and Mg<sup>2+</sup> supplemented with 0.04% BSA, spun  
1024 down at 250 × g for 5 min, and resuspended in HBSS without Ca<sup>2+</sup> and Mg<sup>2+</sup> supplemented with  
1025 0.04% BSA. Cells were counted using a hemocytometer, diluted to ~1000 nuclei/μL, and further  
1026 processed following the 10X Genomics Chromium Single Cell 3' Reagent Kits User Guide (v3.1  
1027 Chemistry). We targeted 10,000 cells per sample per reaction. Libraries from individual samples  
1028 were pooled and sequenced on the NovaSeq 6000 sequencing system, targeting 22,500 read pairs  
1029 per cell.

1030 The raw sequencing signals in the BCL format were demultiplexed into fastq format using the  
1031 “mkfastq” function in the Cell Ranger suite (v.7.1.0, 10x Genomics). Cell Ranger count pipeline  
1032 was implemented for cell barcode calling, reads alignment, and quality assessment using the  
1033 human reference genome (GRCh38) following the protocols described by 10X Genomics. The  
1034 pipeline assessed the overall quality to retain all intact cells from the background and filtered out  
1035 non-cell associated reads. All gene expression libraries in this study showed a high fraction of  
1036 reads in cells, indicating high RNA content in called cells and minimal levels of ambient RNA  
1037 detected. The overall summary of data quality for each sample is listed in Supplementary Table  
1038 15. Next, we further assessed the data at the individual cell level and retained high-quality cells  
1039 with the following criteria: (1) The number of detected genes (nFeature\_RNA) is greater than  
1040 1000 and less than 10,000; (2) less than 10% of all reads mapped to mitochondrial genes. Raw  
1041 counts were log-normalized with a size factor of 10,000. The first 30 principal components were  
1042 used to construct the nearest neighbor graph and Louvain clustering was used to identify clusters.  
1043 Clusters with significantly fewer UMI counts, likely consisting of low-quality, dying cells, were  
1044 also excluded for further analysis. The identity of specific cell types was determined based on the  
1045 expression of known marker genes (Extended Data Fig. 11k, Supplementary Table 16). The 10

1046 identified cell types were dividing cell (Dividing), radial glia (RG), ependymal cell (Ependymal  
1047 cell), intermediate progenitor cell for excitatory neurons (IPC-EN), tripotential intermediate  
1048 progenitor cell (Tri-IPC), astrocyte (Astrocyte), oligodendrocyte precursor cell (OPC),  
1049 intermediate progenitor cell for inhibitory neurons (IPC-IN), and inhibitory neurons (IN).

1050

#### 1051 Clonal analysis of glial progenitors

1052 For clonal analysis, samples for FACS were processed as above with the following changes:  
1053 individual tRG, oRG, or Tri-IPC was sorted using a BigFoot Spectral Cell Sorter (Thermo Fisher)  
1054 via single-cell precision mode into a single well of 96-well glass-bottom plates pre-coated with  
1055 polyethylenimine and laminin containing 100  $\mu$ L complete culture medium. For tRG and oRG, the  
1056 complete culture medium was supplemented with 10 ng/mL FGF2 to promote initial cell survival  
1057 and proliferation. The culture medium was changed weekly for a total of two weeks. After two  
1058 weeks, cells were fixed and stained in the same way as mentioned above. The following antibodies  
1059 were used: EOMES (Abcam, ab23345, 1:200), OLIG2 (EMD Millipore, MABN50, 1:200), EGFR  
1060 (abcam, ab231, 1:200), SPARCL1 (R&D systems, AF2728, 1:50), SOX10 (Santa Cruz, sc-365692,  
1061 1:50) and DLX5 (Sigma, HPA005670, 1:100).

1062

#### 1063 Glial progenitor slice transplantation assay

1064 Primary cortical tissue from GW 20-24 was maintained in artificial cerebrospinal fluid (ACSF)  
1065 containing 110 mM Choline chloride, 2.5 mM KCl, 7 mM MgCl<sub>2</sub>, 0.5 mM CaCl<sub>2</sub>, 1.3 mM  
1066 NaH<sub>2</sub>PO<sub>4</sub>, 25 mM NaHCO<sub>3</sub>, 10 mM D-(+)-glucose, and 1  $\times$  Penicillin-Streptomycin. Before use,  
1067 ACSF was bubbled with 95% O<sub>2</sub>/5% CO<sub>2</sub>. Cortical tissue was embedded in a 3.5% low melting  
1068 agarose gel. Embedded tissue was acutely sectioned at 300  $\mu$ m using a vibratome (Leica) before  
1069 being plated on Millicell inserts (Millipore, PICM03050) in 6 well tissue culture plates. Tissue  
1070 slices were cultured at the air-liquid interface in media containing 32% HBSS, 60% Basal  
1071 Medium Eagle, 5% FBS, 1% glucose, 1% N<sub>2</sub> and 1  $\times$  Penicillin-Streptomycin-Glutamine. Slices  
1072 were maintained for 8 days in culture at 37°C and the medium was changed every other day.

1073 Glial progenitors were isolated by FACS, as mentioned above. About 200,000 Cells were spun  
1074 down at 300  $\times$  g for 5 min and resuspended in 0.5 mL complete culture medium containing 1  $\times$   
1075 10<sup>7</sup> PFU CMV-GFP adenoviruses (Vector Biolabs). Next, cells were incubated in a low  
1076 attachment plate for 1 hour under the normal culture condition. After infection, cells were  
1077 washed twice with complete culture medium containing 0.3% BSA and resuspended in slice  
1078 culture medium. About 25,000 cells were transplanted onto the oSVZ of freshly prepared slices  
1079 through a pipette.

1080 After 8 days in culture, slices were fixed with 4% formaldehyde in PBS at room temperature for  
1081 1 h, followed by permeabilization and blocking with PBS-based blocking buffer containing 10%  
1082 donkey serum, 0.2% gelatin, and 1% Triton X-100 at room temperature for 1 h. Samples were  
1083 then incubated with primary antibodies diluted in the blocking buffer at 4 °C for 48 h. Two days  
1084 later, samples were washed in PBS plus 0.1% Triton X-100 four times and incubated with  
1085 secondary antibodies in the blocking buffer at 4 °C for 24 h. After secondary antibody  
1086 incubation, samples were washed twice in PBS plus 0.1% Triton X-100, counterstained with  
1087 DAPI, and washed in PBS again. Z-stack images were acquired with a Leica TCS SP8 using a  
1088 25 $\times$  water immersion objective. Acquired images were processed using Imaris v9.7 (Oxford

1089 Instruments) and Fiji/ImageJ v1.54<sup>103</sup>. The following antibodies were used: GFP (Aveslabs,  
1090 GFP-1020, 1:1,000), EOMES (Abcam, ab23345, 1:200), NeuN (EMD Millipore, ABN90,  
1091 1:250), OLIG2 (EMD Millipore, MABN50, 1:200), EGFR (Abcam, ab32077, 1:200), DLX5  
1092 (Sigma, HPA005670, 1:100), and SPARCL1 (R&D systems, AF2728, 1:50).

1093

#### 1094 Classification of Tri-IPC-derived inhibitory neurons

1095 Human ganglionic eminence single-cell RNA-seq data from Shi et al.<sup>44</sup> were downloaded from  
1096 GEO (GSE135827) and used as the reference. We integrated all samples using the RPCA  
1097 methods, subset the data to focus on cells from the ganglionic eminence, re-clustered the cells,  
1098 and annotated interneuron subtypes based on marker genes reported in the literature<sup>45</sup> (Extended  
1099 Data Fig. 13a,b).

1100 To determine the identity of Tri-IPC-derived inhibitory neurons based on the reference dataset,  
1101 we applied SingleCellNet (v0.1.0), a random-forest-based cell type classification method.  
1102 Specifically, we randomly selected 400 cells from each cell type as the training set. We found the  
1103 top 200 most differentially expressed genes per cell type, and then ranked the top 200 gene pairs  
1104 per cell type from those genes. The preprocessed training data were then transformed according  
1105 to the selected gene pairs and were used to build a multi-class classifier of 1000 trees.  
1106 Additionally, we created 400 randomized cell expression profiles to train up an “unknown”  
1107 category in the classifier. After the classifier was built, we selected 100 cells from each cell type  
1108 from the held-out data, along with another 100 randomized cells, and assessed the performance  
1109 of the classifier on the held-out data using Precision-Recall curves, obtaining an average AUPRC  
1110 of 0.901. To classify Tri-IPC-derived inhibitory neurons, we transformed the query data with top  
1111 pairs selected from the optimized training data and classified it with the trained classifier. Here,  
1112 we chose a classification score threshold of 0.35, and cells with scores below this threshold were  
1113 assigned as unmapped.

1114 As an alternative classification method to determine the identity of Tri-IPC-derived inhibitory  
1115 neurons, we performed mutual nearest neighbors-based label transfer using the MapQuery()  
1116 function in Seurat v4. The first 30 principal components were used to identify transfer anchors.  
1117 Cell type labels from Shi et al. were transferred to Tri-IPC-derived inhibitory neurons when  
1118 confidence was high (prediction score > 0.5). Cells with prediction scores equal to or lower than  
1119 0.5 were labeled as unmapped.

1120

#### 1121 Classification of Tri-IPC-derived astrocytes

1122 Mouse single-cell RNA-seq data from Di Bella et al.<sup>48</sup> were downloaded from the Single Cell  
1123 Portal (SCP1290) and used as the reference. We subset the data and focused on astrocytes and  
1124 cycling glial cells (defined by the original authors). These cells were re-clustered and annotated  
1125 as Olig2 or S100a11 lineages based on marker genes reported in the literature<sup>47</sup> (Extended Data  
1126 Fig. 13e,f). We used Tri-IPC-derived astrocytes as the query data and applied SingleCellNet in  
1127 the same way as for Tri-IPC-derived inhibitory neurons. We also applied Seurat label transfer in  
1128 the same way, except that 20 principal components were used to identify transfer anchors.

1129 We also used astrocytes at the infancy stage from our snMultiome data, when we were able to  
1130 distinguish the two astrocyte lineages, as the reference. We selected the astrocytes at infancy  
1131 from the whole dataset and redid nearest neighbor analysis with 1–50 PCA components (already

1132 computed after SCTransform and RPCA integration). These cells were re-clustered on the basis  
1133 of the resulting nearest neighbor graph and annotated on the basis of marker genes reported in  
1134 the literature<sup>47</sup> (Extended Data Fig. 13i,j). We used Tri-IPC-derived astrocytes as the query data,  
1135 which was re-processed in the same way as snMultiome data, including SCTransform v2  
1136 modeling and cell cycle regression. SingleCellNet was applied in the same way as above. For  
1137 Seurat label transfer, the first 50 principal components were used to identify transfer anchors.

1138

### 1139 Building single-cell risk map for cognitive traits and brain disorders by SCAVENGE

1140 We implemented SCAVENGE (v1.0.2)<sup>51</sup> to integrate the snATAC-seq part of the snMultiome  
1141 data with GWAS data of four cognitive traits (fluid intelligence, processing speed, executive  
1142 function, and working memory) and five neuropsychiatric disorders (autism spectrum disorder  
1143 [ASD], major depressive disorder [MDD], bipolar disorder [BPD], attention-deficit/hyperactivity  
1144 disorder [ADHD], and schizophrenia [SCZ]). Analysis of Alzheimer's disorder was included as a  
1145 positive control. For each trait or condition, we performed multi-SNP-based conditional and joint  
1146 association analysis on all GWAS SNPs with default settings. A stepwise model selection  
1147 procedure was implemented to select independently associated SNPs and compute the fine-  
1148 mapped posterior probability (PP). The PP was imported for our subsequent gchromVAR  
1149 analysis<sup>104</sup>, where we built a cell-by-peak count matrix using peak called from integrated  
1150 snATAC-seq data. A gchromVAR score indicating potential GWAS signal enrichment over a set  
1151 of background peaks was calculated for each cell after correcting GC bias. To minimize the batch  
1152 effects, we used the batch-aligned LSI matrix for the nearest neighbor graph construction and  
1153 subsequent network propagation. A trait relevant score (TRS) representing the potential GWAS  
1154 risk association was assigned to each cell for constructing the single-cell risk map for cognitive  
1155 traits or neurological disorders. To determine the significant trait-cell association, we considered  
1156 cells receiving top the 0.1% TRS score as traits-relevant and permuted the network propagation  
1157 1000 times for statistical significance. Cells with a P value less than 0.05 were defined as trait  
1158 associated. To determine the trait relevance per cell type, we calculated the odds ratio of  
1159 associated cells with each trait in each cell type over the background and determined statistical  
1160 significance by hypergeometric test followed by Benjamini-Hochberg correction. Cell types with  
1161 FDR < 0.05 and odds ratio > 1.4 were deemed significantly enriched for trait-associated variants.  
1162 Similar analysis were done for regions and age groups. Finally, the TRS scores were  
1163 standardized by z transformation for comparison and visualization (Supplementary Table 18,  
1164 Supplementary Table 19). The GWAS data used in this study can be downloaded from the  
1165 following links: fluid intelligence (phenocode 20016), processing speed (phenocode 20023),  
1166 executive function (phenocode 399), and working memory (phenocode 4282):  
1167 <https://pan.ukbb.broadinstitute.org/downloads/>; ASD:  
1168 <https://figshare.com/articles/dataset/asd2019/14671989>; MDD:  
1169 <https://datashare.ed.ac.uk/handle/10283/3203>; BPD:  
1170 [https://figshare.com/articles/dataset/bip2021\\_noUKBB/](https://figshare.com/articles/dataset/bip2021_noUKBB/); ADHD:  
1171 <https://figshare.com/articles/dataset/adhd2022/22564390>; SCZ:  
1172 <https://figshare.com/articles/dataset/cdg2018-bip-scz/14672019>; ALZ:  
1173 [https://ctg.cncr.nl/software/summary\\_statistics](https://ctg.cncr.nl/software/summary_statistics).

1174

### 1175 **Acknowledgements:**

1176 We thank the NIH NeuroBioBank and the University of Maryland School of Medicine Brain and  
1177 Tissue Bank for providing post-mortem brain tissue samples. We thank the Human Developmental  
1178 Biology Resource for providing first-trimester brain tissue samples. We thank members of the A.  
1179 R. Kriegstein laboratory and T. Nowakowski laboratory for helpful discussions. This study was  
1180 supported by Simons Foundation Autism Research Initiative grant 697827 to J.L. and A.R.K.,  
1181 National Institute of Mental Health (NIMH) grant U01MH114825 to A.R.K. and E.J.H., National  
1182 Institute of Neurological Disorders and Stroke (NINDS) grant R35NS097305 to A.R.K., NINDS  
1183 grant P01NS083513 to A.A.-B., E.J.H., and A.R.K., NINDS grant R01NS123912 to X.D., and  
1184 NIMH grant K99MH131832 to L.W.. J.A.M. was supported by funding from the Government of  
1185 Catalonia (FI-SDUR 20) and from The Company of Biologists – Development (Travelling  
1186 Fellowship).

1187 **Author contributions:**

1188 Conceptualization: L.W., C.W., J.L., A.R.K.; data curation: L.W., C.W.; formal analysis: L.W.,  
1189 C.W., J.A.M.; funding acquisition: L.W., E.J.H., A.A.-B., X.D., J.L., A.R.K.; investigation: L.W.,  
1190 S.C., S.Z., S.W., T.M., A.C.-S., Q.B., L.G.O., M.S.; methodology: L.W., S.Z., A.C.-S., X.G.;  
1191 resources: S.W., M.F.P., E.J.H., A.R.K.; software: L.W., C.W., J.A.M., J.J.A., G.Z.; supervision:  
1192 A.A.-B., X.D., J.L., A.R.K.; visualization: L.W., C.W., J.A.M.; writing – original draft: L.W.,  
1193 C.W., J.A.M.; writing – review & editing: all authors.

1194 **Data availability:** All raw and processed snMultiome sequencing data were deposited to NeMO  
1195 archive and will be accessible at <https://assets.nemoarchive.org/dat-oiif74w>. MERFISH data were  
1196 deposited to Brain Image Library. Processed data are available at an interactive portal at  
1197 <https://cell.ucsf.edu/snMultiome>.

1198 **Code availability:** Code used for data analysis in this manuscript is available at GitHub  
1199 ([https://github.com/complexdisease/Human\\_Cortex\\_Dev\\_Multiome](https://github.com/complexdisease/Human_Cortex_Dev_Multiome)).

1200 **Competing interests:** A.R.K. is a co-founder, consultant, and director of Neurona Therapeutics.  
1201 The remaining authors declare no competing interests.

1202

1203



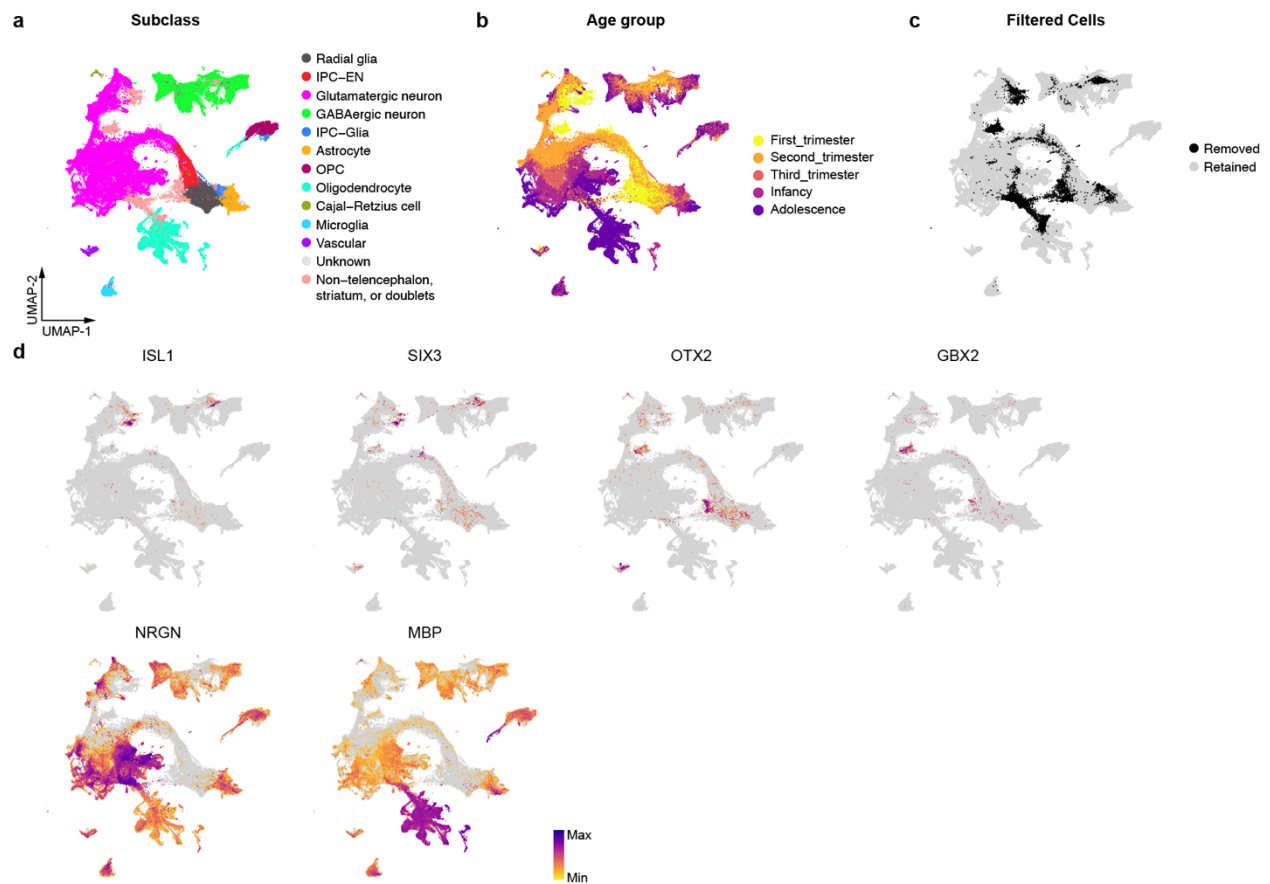

1204

1205 **Extended Data Fig. 1 | Filtering of the single-nucleus multiome data. a**, UMAP plots showing  
1206 the distribution of cell subclasses in the single-nucleus multiome data prior to data filtering. **b**,  
1207 UMAP plots showing the distribution of age groups in the single-nucleus multiome data prior to  
1208 data filtering. **c**, UMAP plots showing the distribution of cells removed during data filtering. **d**,  
1209 UMAP plots showing the expression levels of genes identified in the striatum (*ISL1* and *SIX3*),  
1210 diencephalon (*OTX2* and *GBX2*), neuronal dendrites (*NRGN*), and oligodendrocyte processes  
1211 (*MBP*).

1212

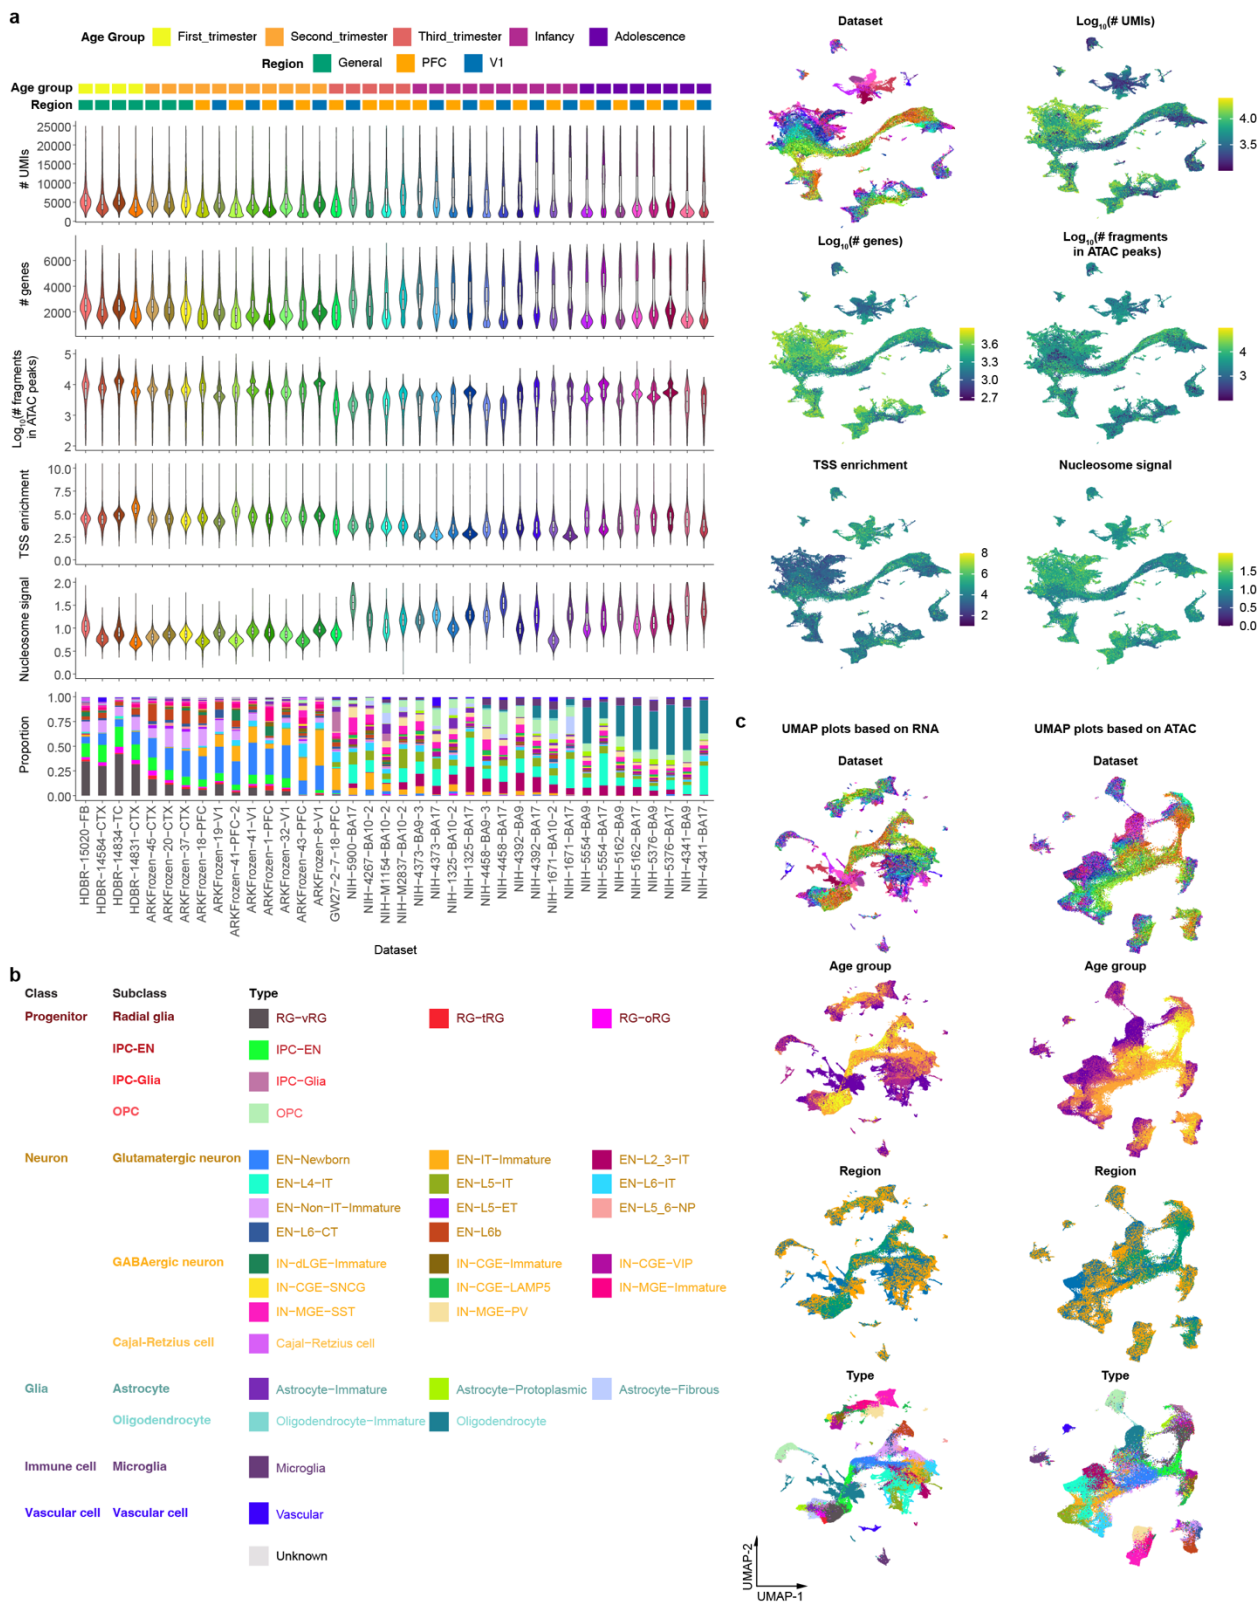

1213

1214 **Extended Data Fig. 2 | Quality control of the single-nucleus multiome data.** a, Violin plots,  
 1215 box plots, barplots, and UMAP plots of several quality control metrics for evaluating the quality  
 1216 of individual samples, including numbers of unique molecular identifiers (# UMIs), numbers of

1217 identified genes (# genes), number of fragments in ATAC peaks, transcription start site (TSS)  
1218 enrichment scores, and proportion of individual cell types in each sample. The legend for cell types  
1219 can be found in panel b. **b** Classes, subclasses, and types identified from the snMultiome data. **c**,  
1220 UMAP plots generated based on RNA or ATAC data only. The legend can be found in panel a and  
1221 b.  
1222

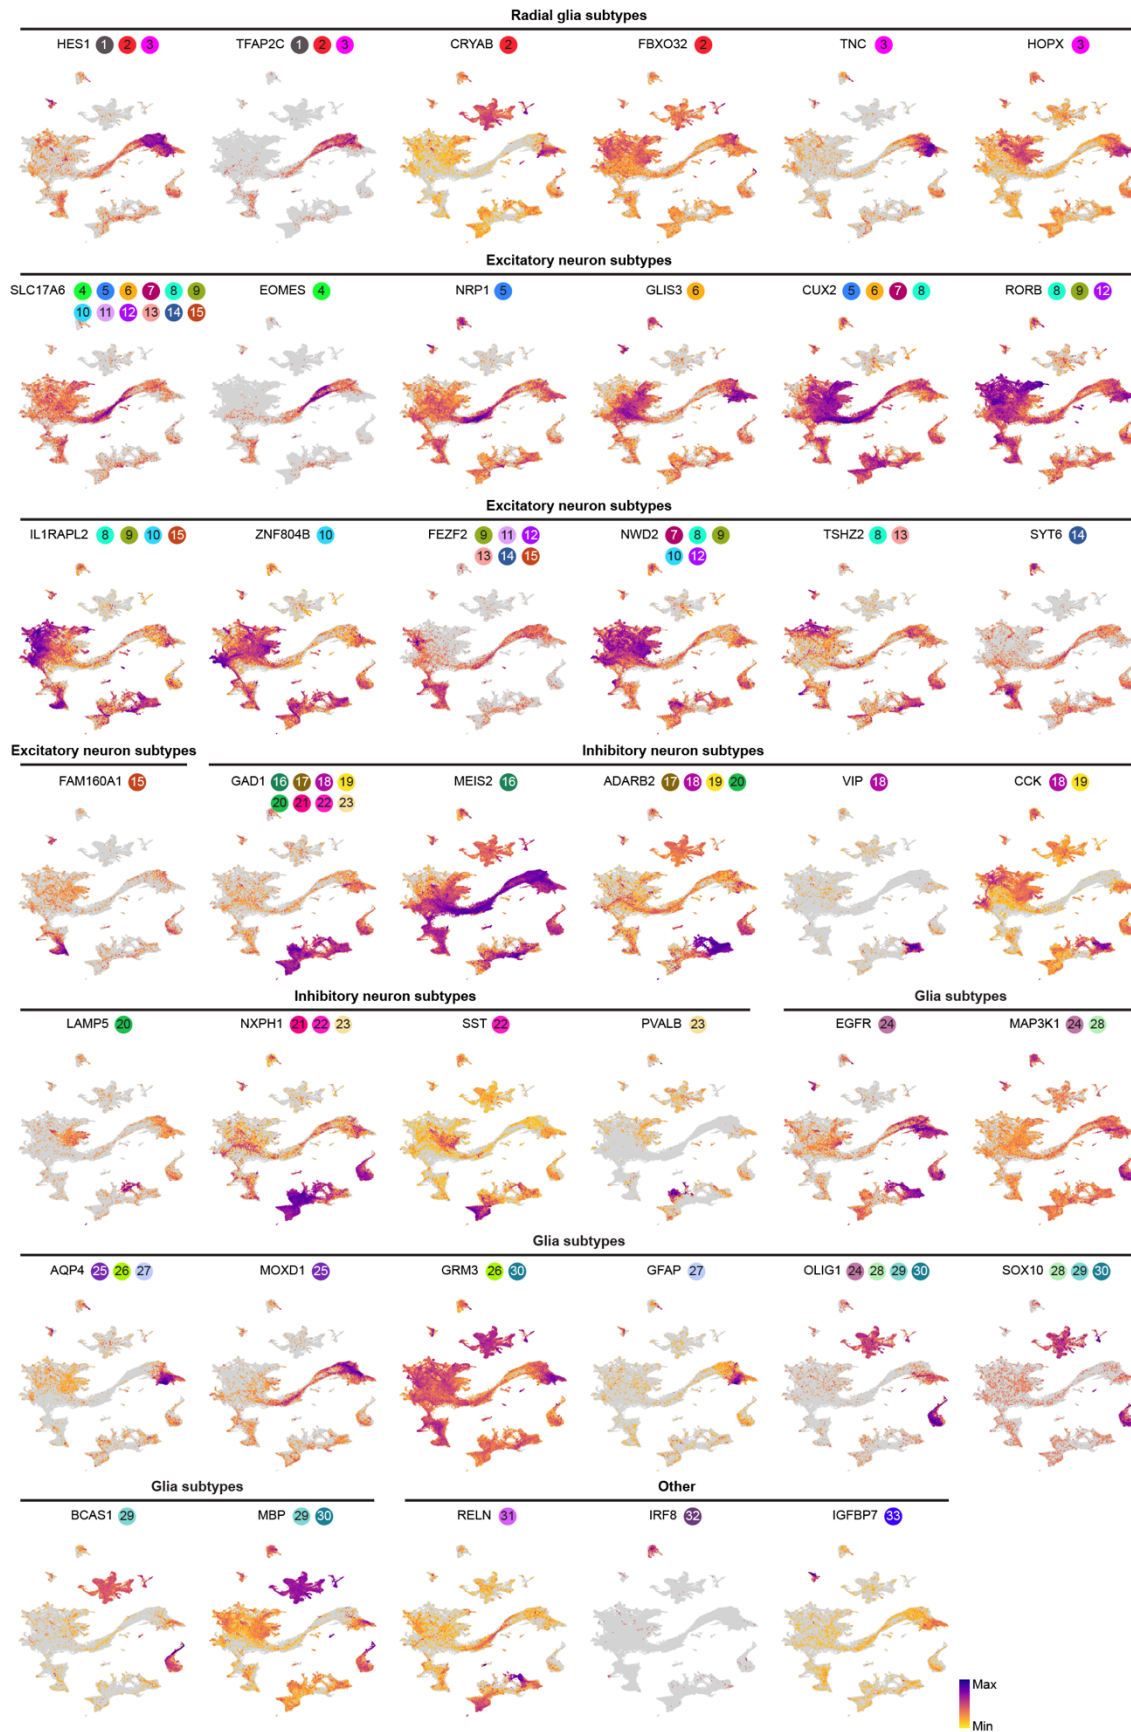



1224 **Extended Data Fig. 3 | Expression patterns of marker genes in the single-nucleus multiome**  
1225 **data.** UMAP plots of all cells showing the expression levels of cell-type-specific marker genes.  
1226 The colored circles and numbers pinpoint specific cell types where the gene is expressed. The  
1227 legend for these numbers can be found in Fig. 1c.

1228

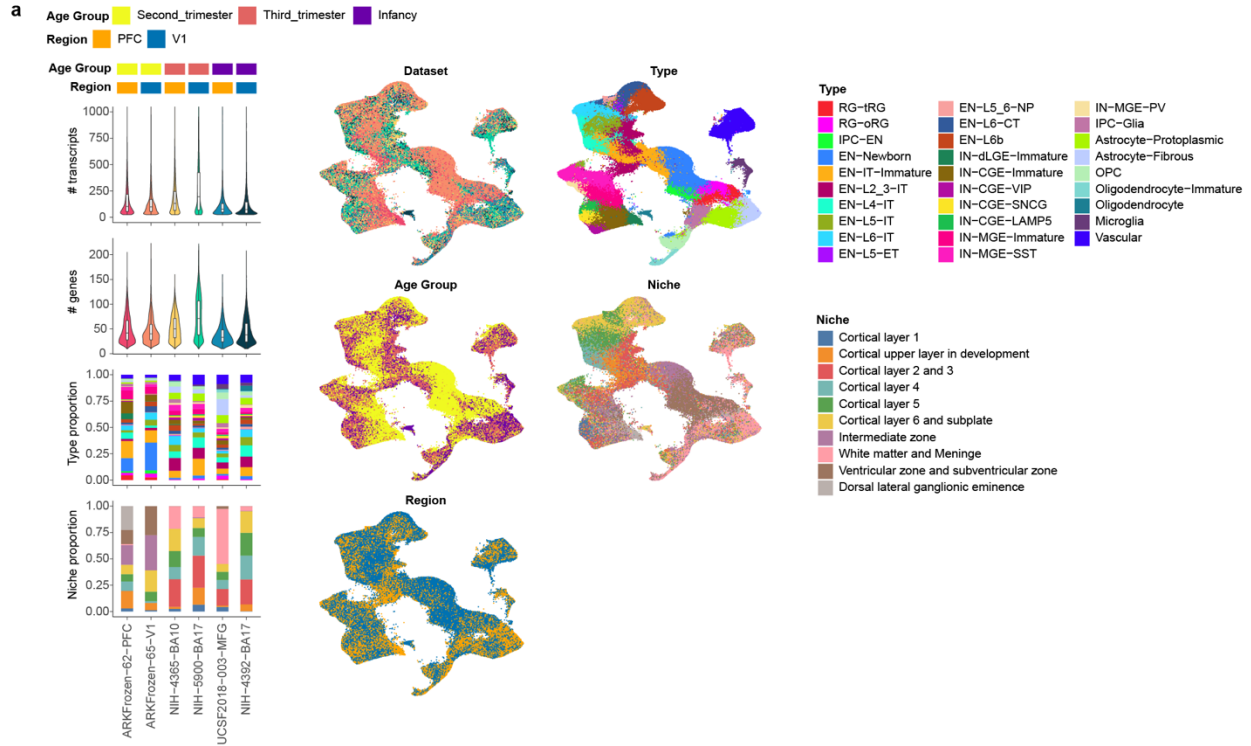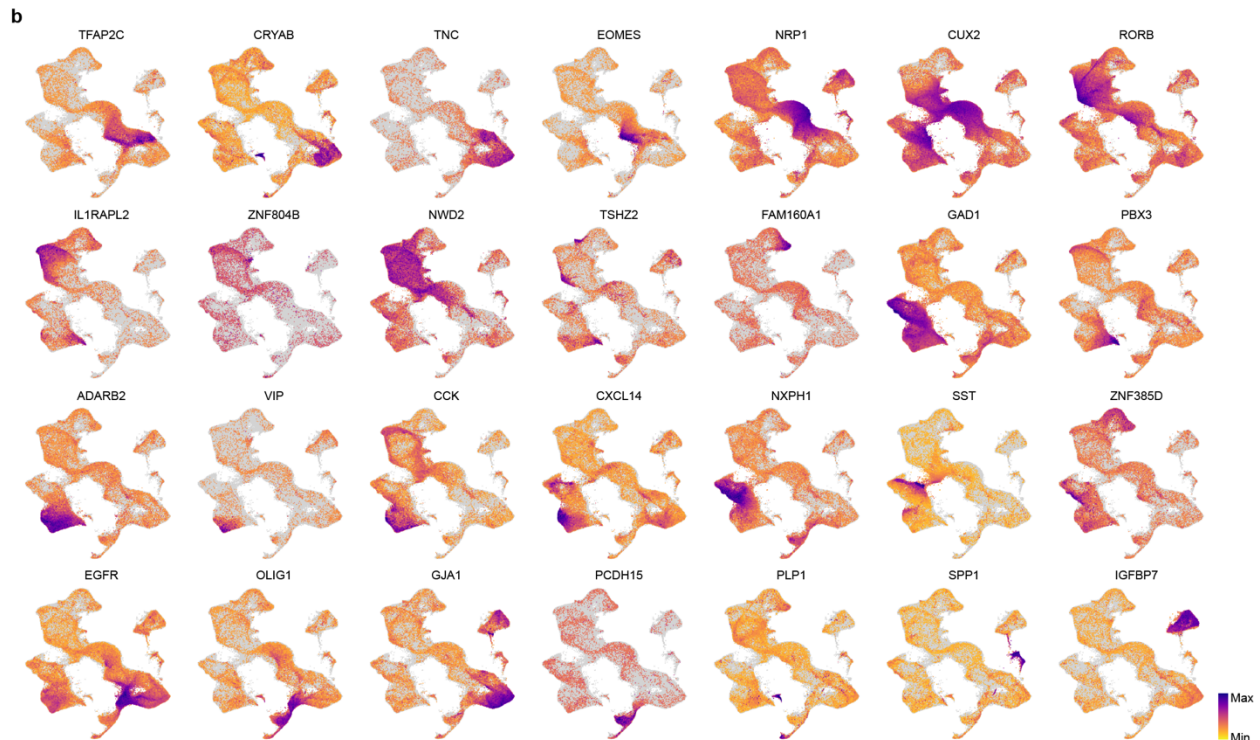

1229

1230 **Extended Data Fig. 4 | Quality control and annotation of MERFISH data.** a, Violin plots, box  
 1231 plots, barplots, and UMAP plots of several metadata of MERFISH samples, including numbers of  
 1232 detected transcripts (# transcript), numbers of identified genes (# genes), age groups, regions, cell

1233 types, and niches. **b**, UMAP plots of all cells in the MERFISH dataset showing the expression  
1234 levels of cell-type-specific marker genes.  
1235

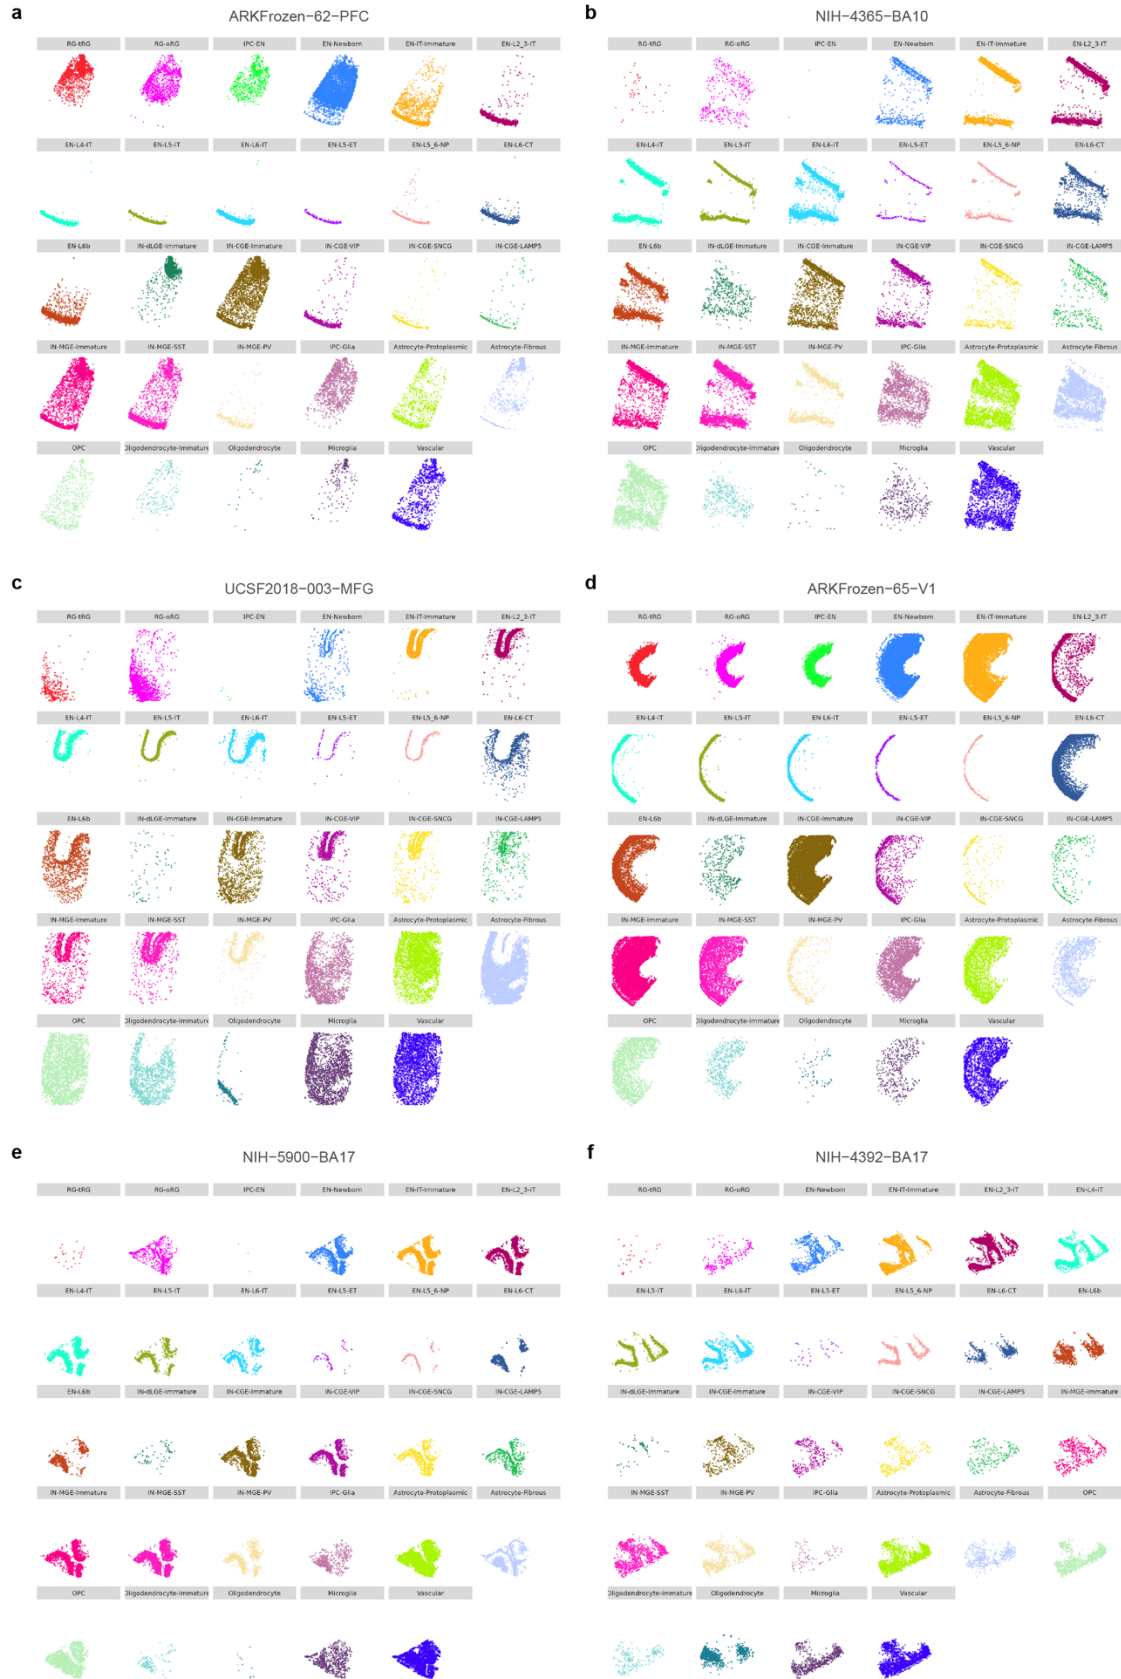



1237 **Extended Data Fig. 5 | Spatial distribution of cell types in individual MERFISH samples.**

1238

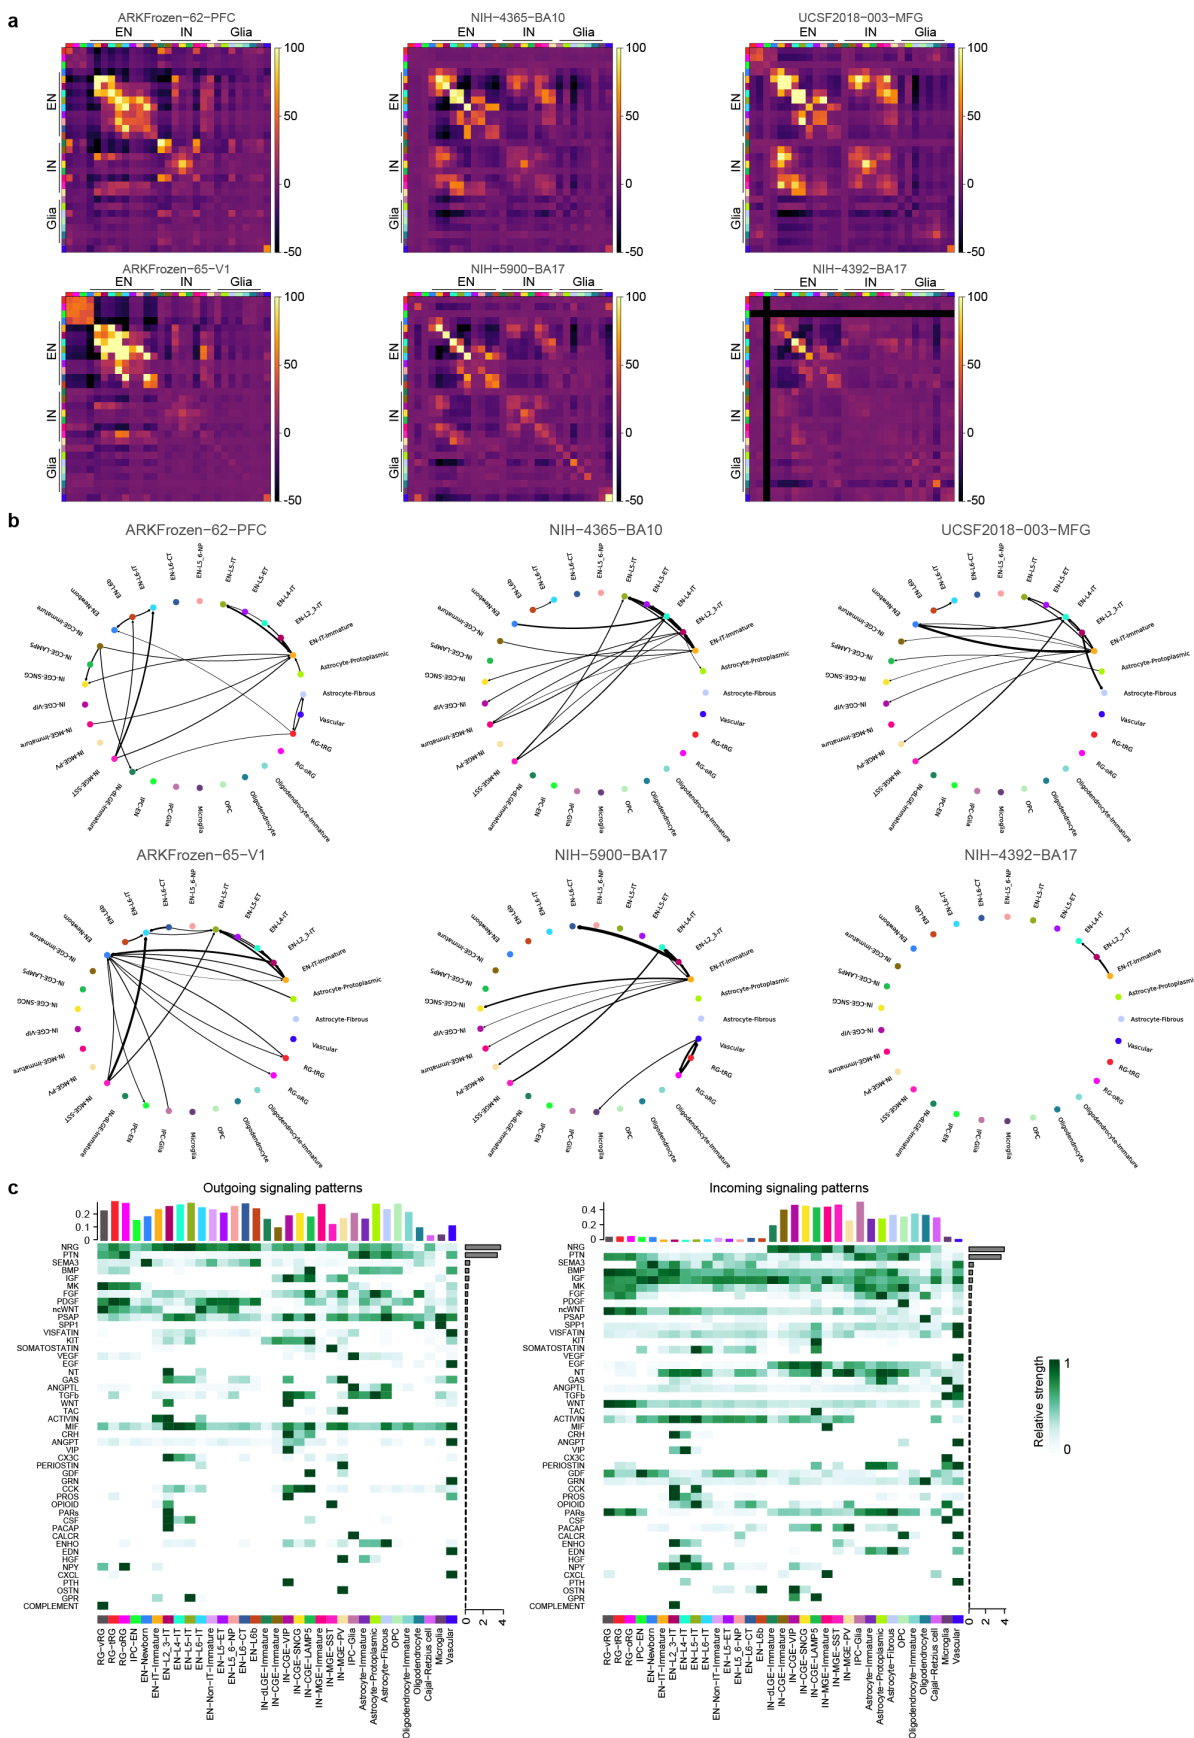

1240 **Extended Data Fig. 6 | Intercellular communication between cell types in developing human**  
1241 **cortex. a**, Heatmaps showing neighborhood enrichment z scores of each MERFISH sample. The  
1242 row and column annotations are color-coded by cell types, the legend of which can be found in  
1243 Fig. 2a. When a particular cell type is not present in the dataset, the neighborhood enrichment z  
1244 scores were arbitrarily set to  $-50$ . **b**, Circular maps showing significant intercellular  
1245 communication determined by NCEM in each MERFISH sample. **c**, Heatmaps showing the  
1246 relative strength of outgoing (left) and incoming (right) signaling pathways in individual cell types.  
1247 The bar graphs on the top and right side of the heatmaps are the sum of communication probability  
1248 (interaction strength) for each cell type and signaling pathway, respectively.  
1249

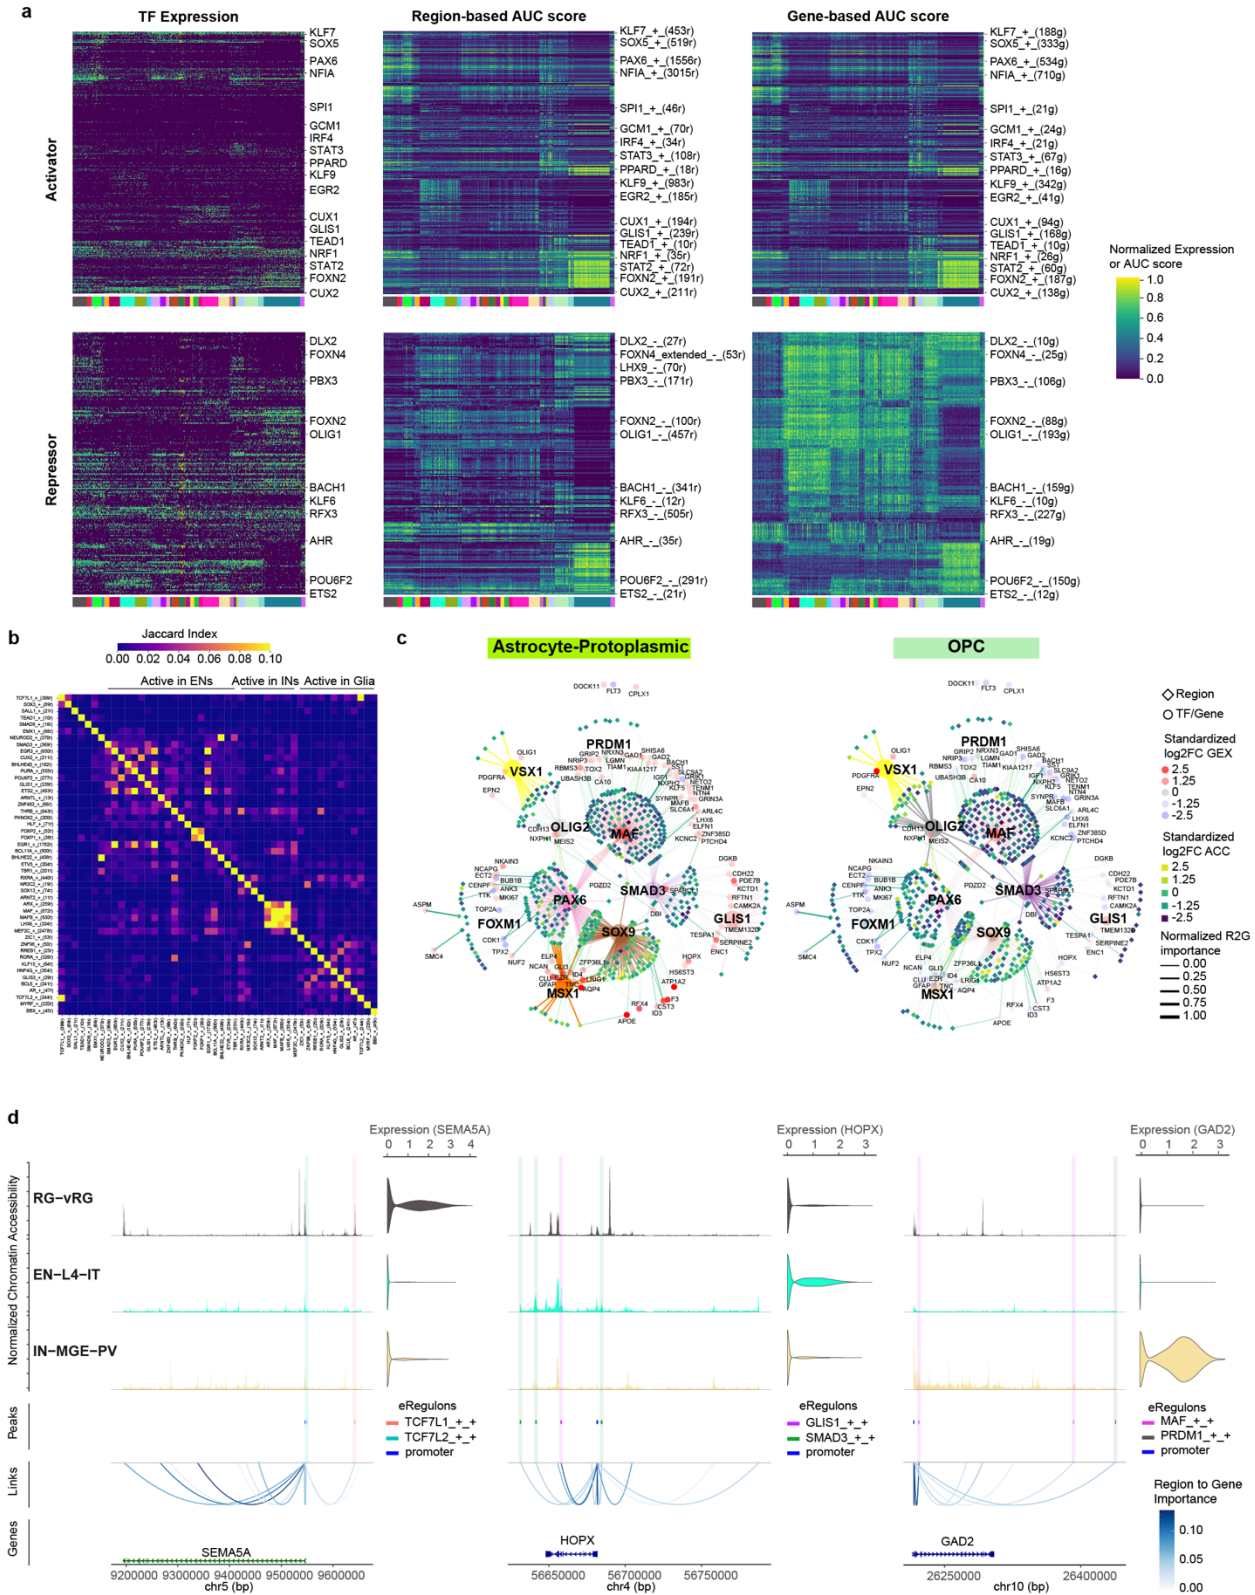

1250

1251 **Extended Data Fig. 7 | Cell-type-specific gene regulatory networks.** **a**, Heatmaps showing the  
 1252 min-max normalized TF expression levels, region-based AUC scores, and gene-based AUC scores  
 1253 of activator eRegulons across cell types. **b**, A heatmap showing Jaccard similarity matrix of target

1254 regions of cell-type-specific eRegulons listed in Fig. 3a. **c**, Gene regulatory networks of selective  
1255 eRegulons in Astrocyte-Protoplasmics and OPCs. TF nodes and their links to enhancers are  
1256 individually colored. The size and the transparency of the TF nodes represent their gene expression  
1257 levels in each cell type. **d**, Coverage plots showing aggregated ATAC profiles across RG-vRGs,  
1258 EN-L4-ITs, and IN-MGE-PVs on three genomic loci—*SEMA5A*, *HOPX*, and *GAD2*. Identified  
1259 candidate cis-regulatory elements (cCREs) are colored by their corresponding eRegulons. Region  
1260 to gene links are shown as arcs and color-scaled based on region–gene importance scores obtained  
1261 from SCENIC+ analysis.

1262



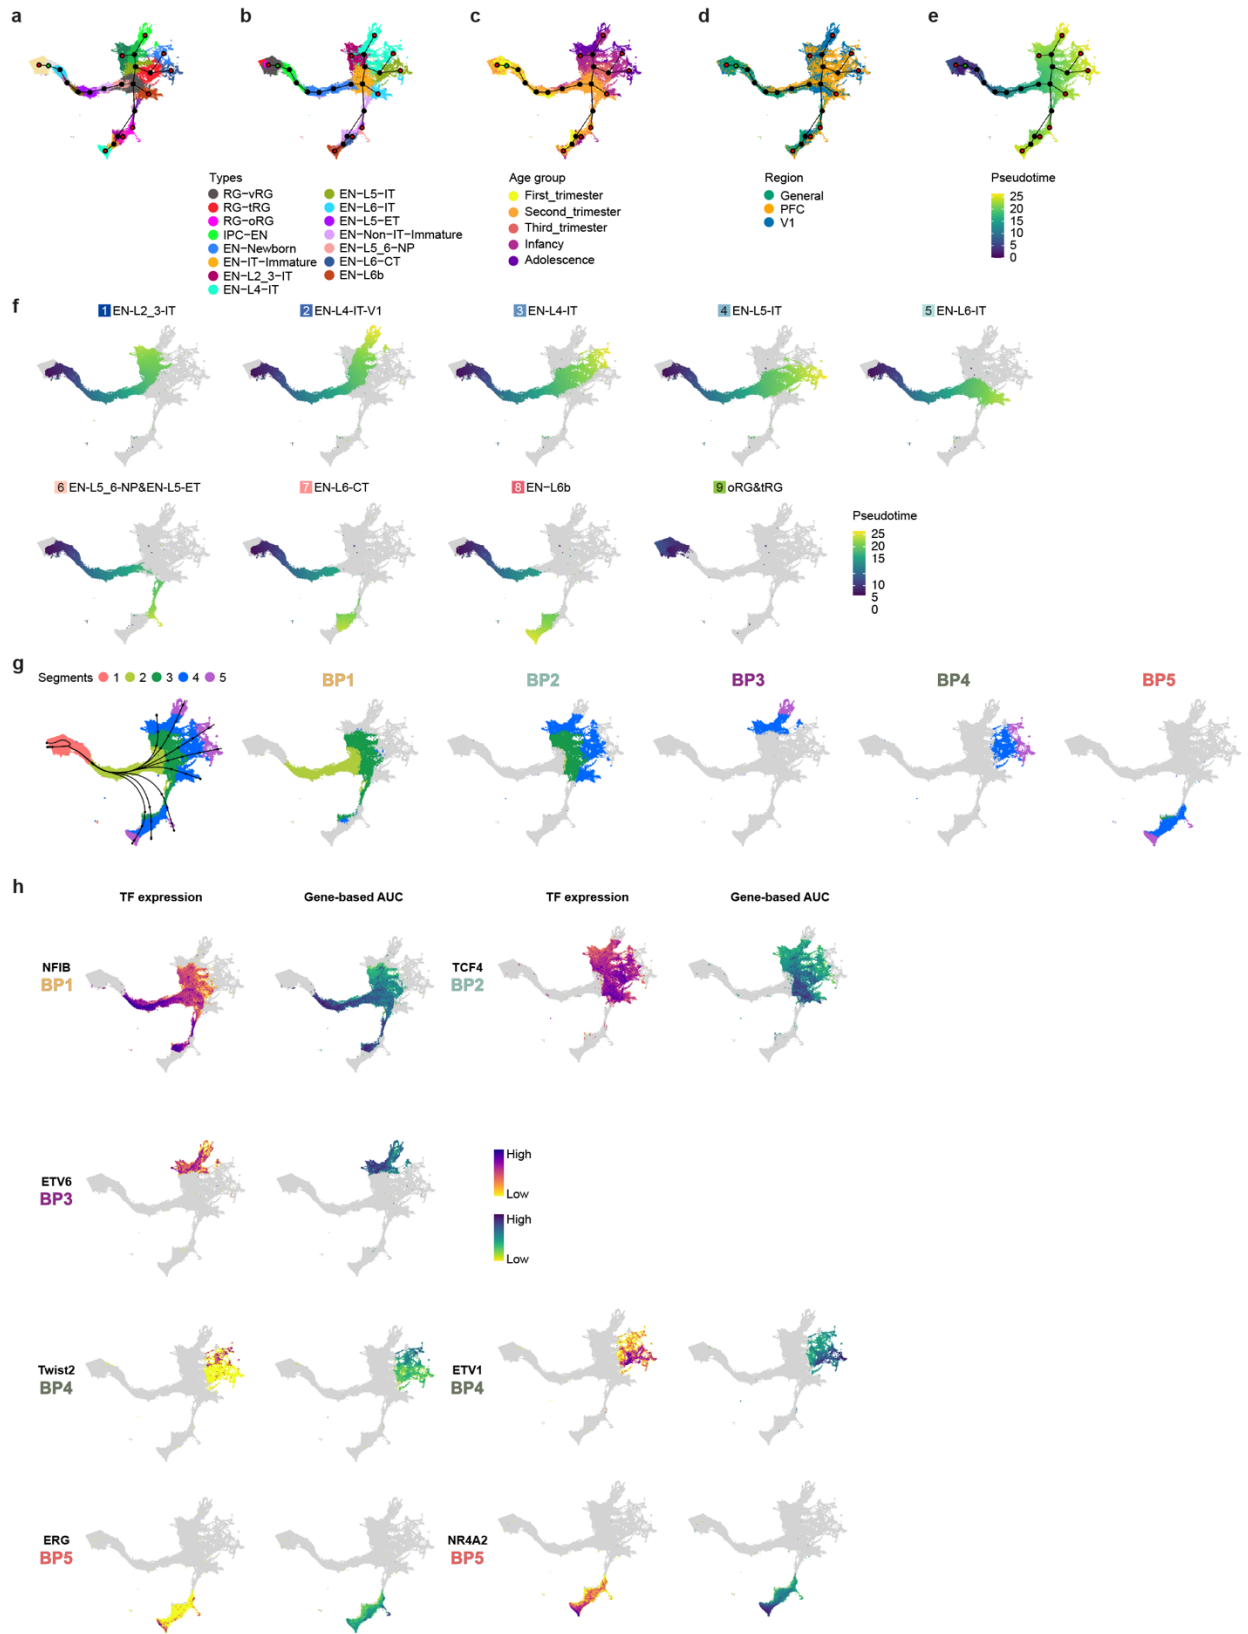

1264 **Extended Data Fig. 8 | Differentiation trajectories of excitatory neuron lineages. a–e**, UMAP  
1265 plots of cells belonging to excitatory neuron lineages with clusters connected by a minimum  
1266 spanning tree showing. The green node indicates the root node, and the red nodes indicate the  
1267 ending nodes. Cells are color-coded by clusters (**a**), types (**b**), age groups (**c**), regions (**d**), or  
1268 pseudotime (**e**). **f**, UMAP plots of each of the nine excitatory neuron lineages colored by  
1269 pseudotime. **g**, UMAP plots of excitatory neuron lineages colored by the five pseudotime segments  
1270 used for eRegulon activity analysis at bifurcation points. **h**, UMAP plots highlighting  
1271 representative eRegulons involved in trajectory determination at bifurcation points.  
1272

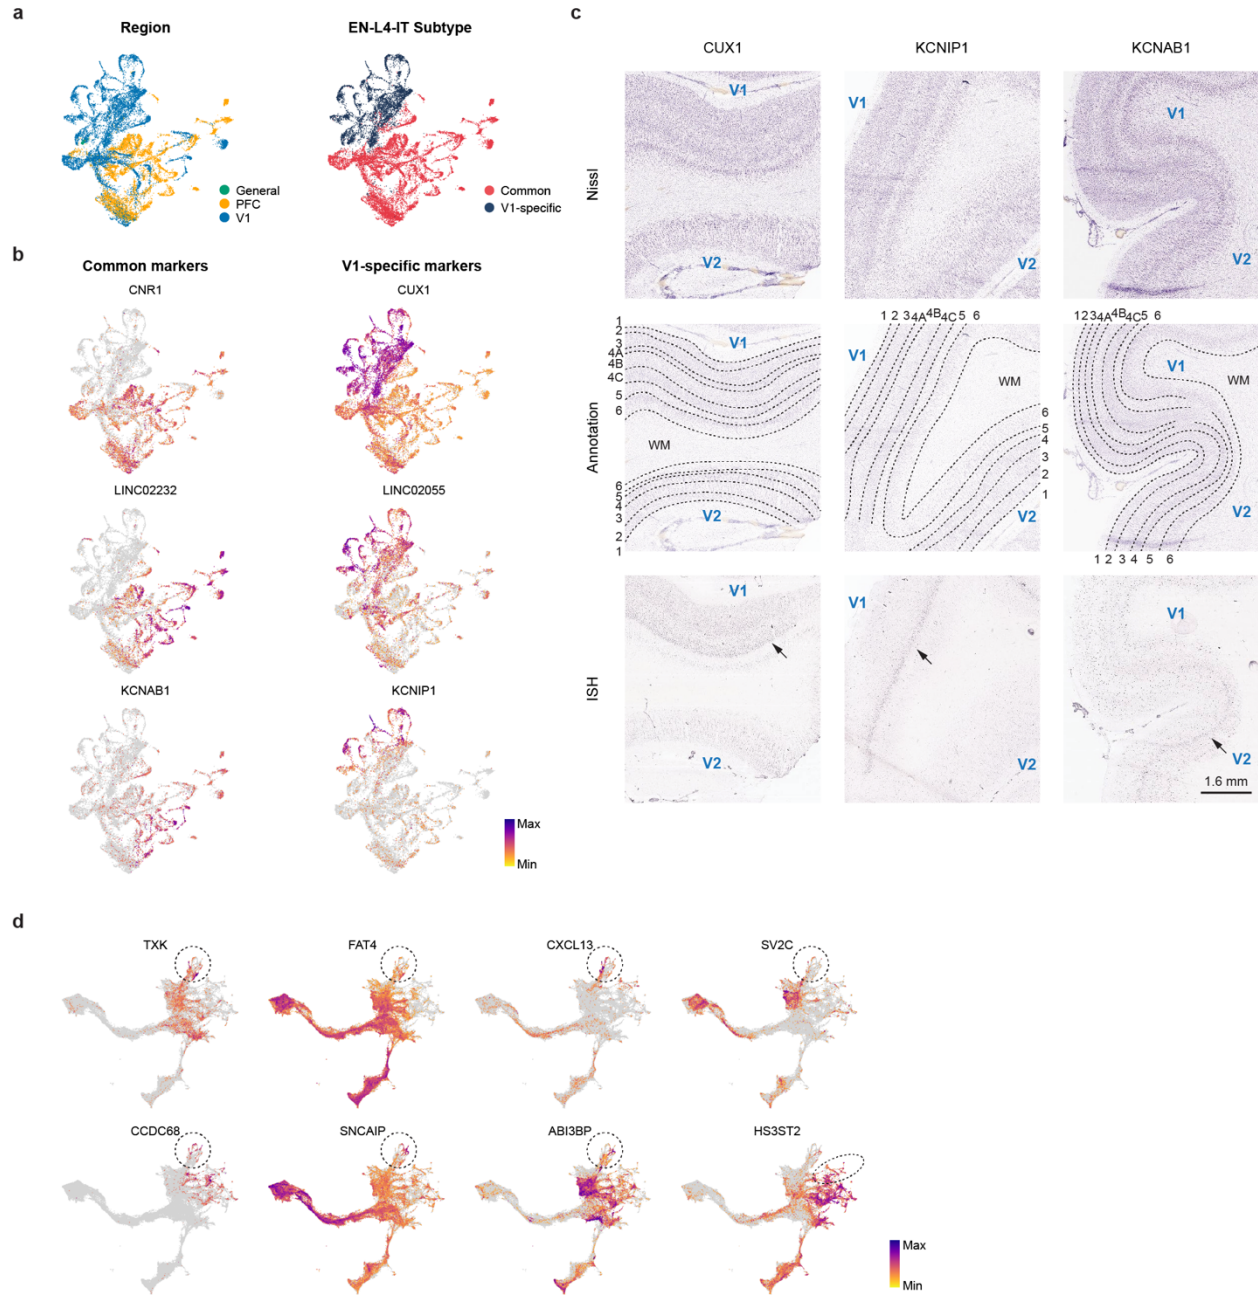

1273

1274 **Extended Data Fig. 9 | Markers of V1-specific EN-L4-IT subtype.** **a**, UMAP plots of all EN-  
 1275 L4-IT color-coded by regions (left) and subtypes (right). **b**, UMAP plots showing the expression  
 1276 levels of representative differentially expressed genes between V1-specific and common EN-L4-  
 1277 IT neurons. **c**, In situ hybridization (ISH) of V1-biased (*CUX1* and *KCNIP1*), and common-biased  
 1278 genes in EN-L4-IT neurons in adult human V1 and V2 areas. **d**, UMAP plots of EN-L4-IT subtype  
 1279 marker genes found in adult human V1.

1280

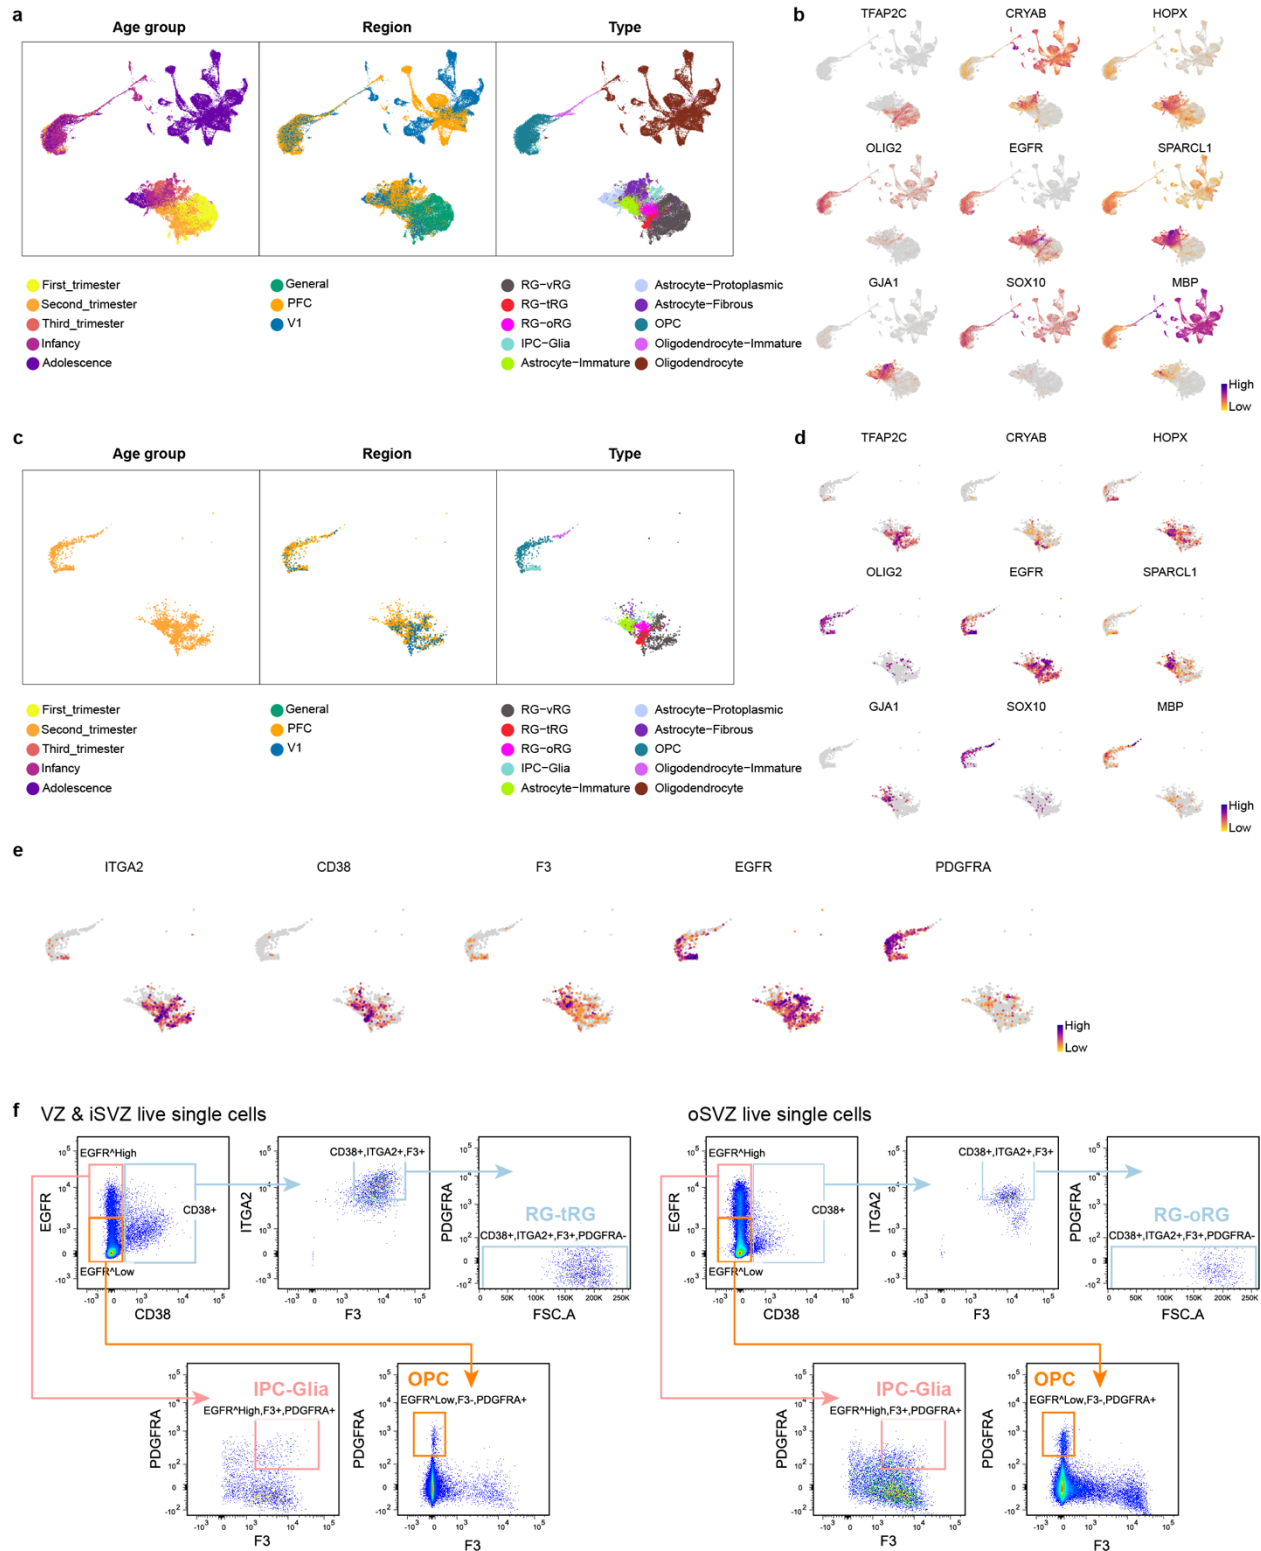

1281

1282 **Extended Data Fig. 10 | Markers of human glial cells and their isolation strategies.** a, UMAP  
 1283 plots of cells belonging to glial lineages color-coded by age groups (left), regions (middle), and  
 1284 types (right). b, UMAP plots of cells belonging to glial lineages showing the expression levels of  
 1285 typical marker genes of individual cell types. c, UMAP plots of GW20 to GW23 cells belonging

1286 to glial lineages color-coded by age groups (left), regions (middle), and types (right). **d**, UMAP  
1287 plots of GW20 to GW23 cells belonging to glial lineages showing the expression levels of typical  
1288 marker genes of individual cell types. **e**, UMAP plots of GW20 to GW23 cells belonging to glial  
1289 lineages showing the expression levels of surface markers used for glial progenitor isolation. **f**,  
1290 Schematic of the sorting strategy for glial progenitors. VZ & iSVZ, ventricular zone and inner  
1291 subventricular zone; oSVZ, outer subventricular zone.  
1292



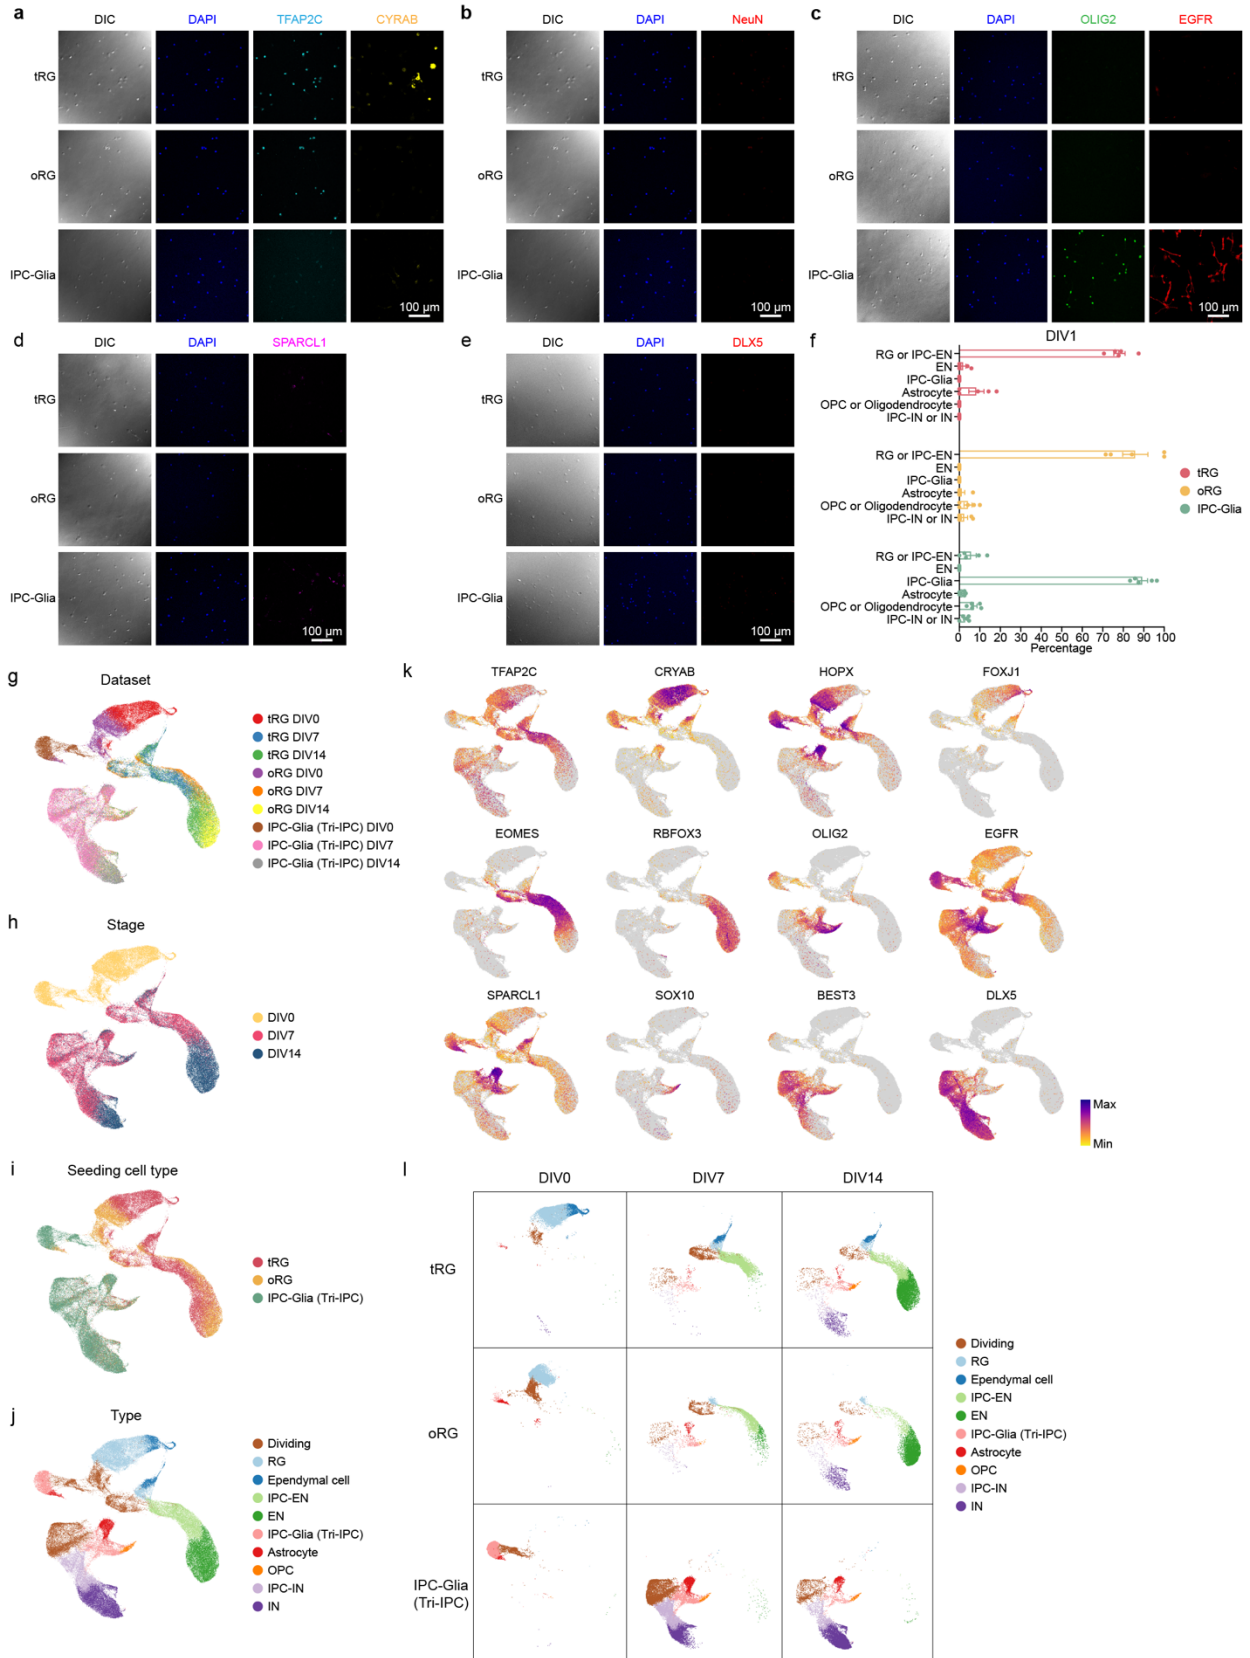

1294 **Extended Data Fig. 11 | Characterization of human glial progenitor differentiation. a–e,**  
1295 Immunostaining of isolated glial progenitors on days *in vitro* 1. **f,** Quantification of six cell types  
1296 after sorting on days *in vitro* 1 (n = 5, 5, 5 samples), including RG or IPC-EN (TFAP2C<sup>+</sup>), EN  
1297 (NeuN<sup>+</sup>), IPC-Glia (OLIG2<sup>+</sup>EGFR<sup>+</sup>), astrocyte (SPARCL1<sup>+</sup>), OPC or oligodendrocyte  
1298 (OLIG2<sup>+</sup>EGFR<sup>-</sup>), and IPC-IN or IN (DLX5<sup>+</sup>). **g–j,** UMAP plots of isolated glial progenitors and  
1299 their progenies during *in vitro* differentiation based on single-cell RNA sequencing data color-  
1300 coded by datasets (**g**), stages (**h**), seeding cell types (**i**), and types (**j**). **k,** UMAP plots of isolated  
1301 glial progenitors and their progenies showing the expression levels of typical marker genes of  
1302 individual cell types. **i,** UMAP plots of isolated glial progenitors and their progenies separated by  
1303 seeding cell types and stages.

1304

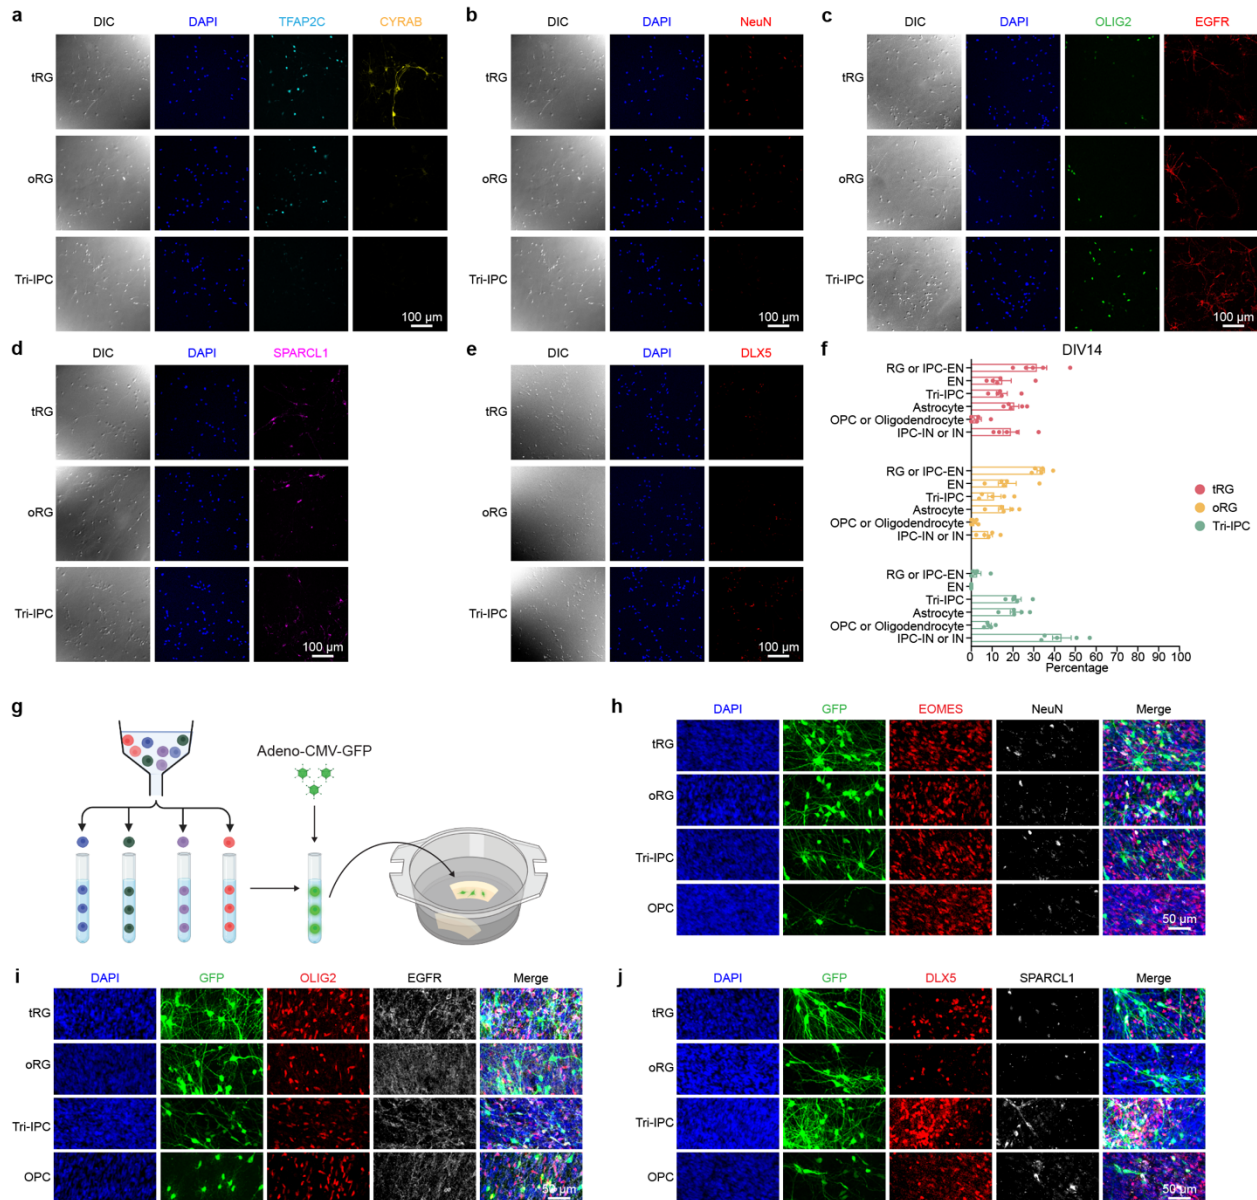

1305

1306 **Extended Data Fig. 12 | Lineage potential of human glial progenitors. a–e**, Immunostaining of  
 1307 progenies of glial progenitors on days *in vitro* 14. **f**, Quantification of six cell types after sorting  
 1308 on days *in vitro* 14 (n = 5, 5, 5 samples), including RG or IPC-EN (TFAP2C<sup>+</sup>), EN (NeuN<sup>+</sup>), Tri-  
 1309 IPC (OLIG2<sup>+</sup>EGFR<sup>+</sup>), astrocyte (SPARCL1<sup>+</sup>), OPC or oligodendrocyte (OLIG2<sup>+</sup>EGFR<sup>-</sup>), and  
 1310 IPC-IN or IN (DLX5<sup>+</sup>). **g**, Schematic of the slice transplantation assay for glial progenitors. **h–j**,  
 1311 Immunostaining of progenies after progenitor transplantation to acute cortical slices on days *in*  
 1312 *vitro* 8.

1313

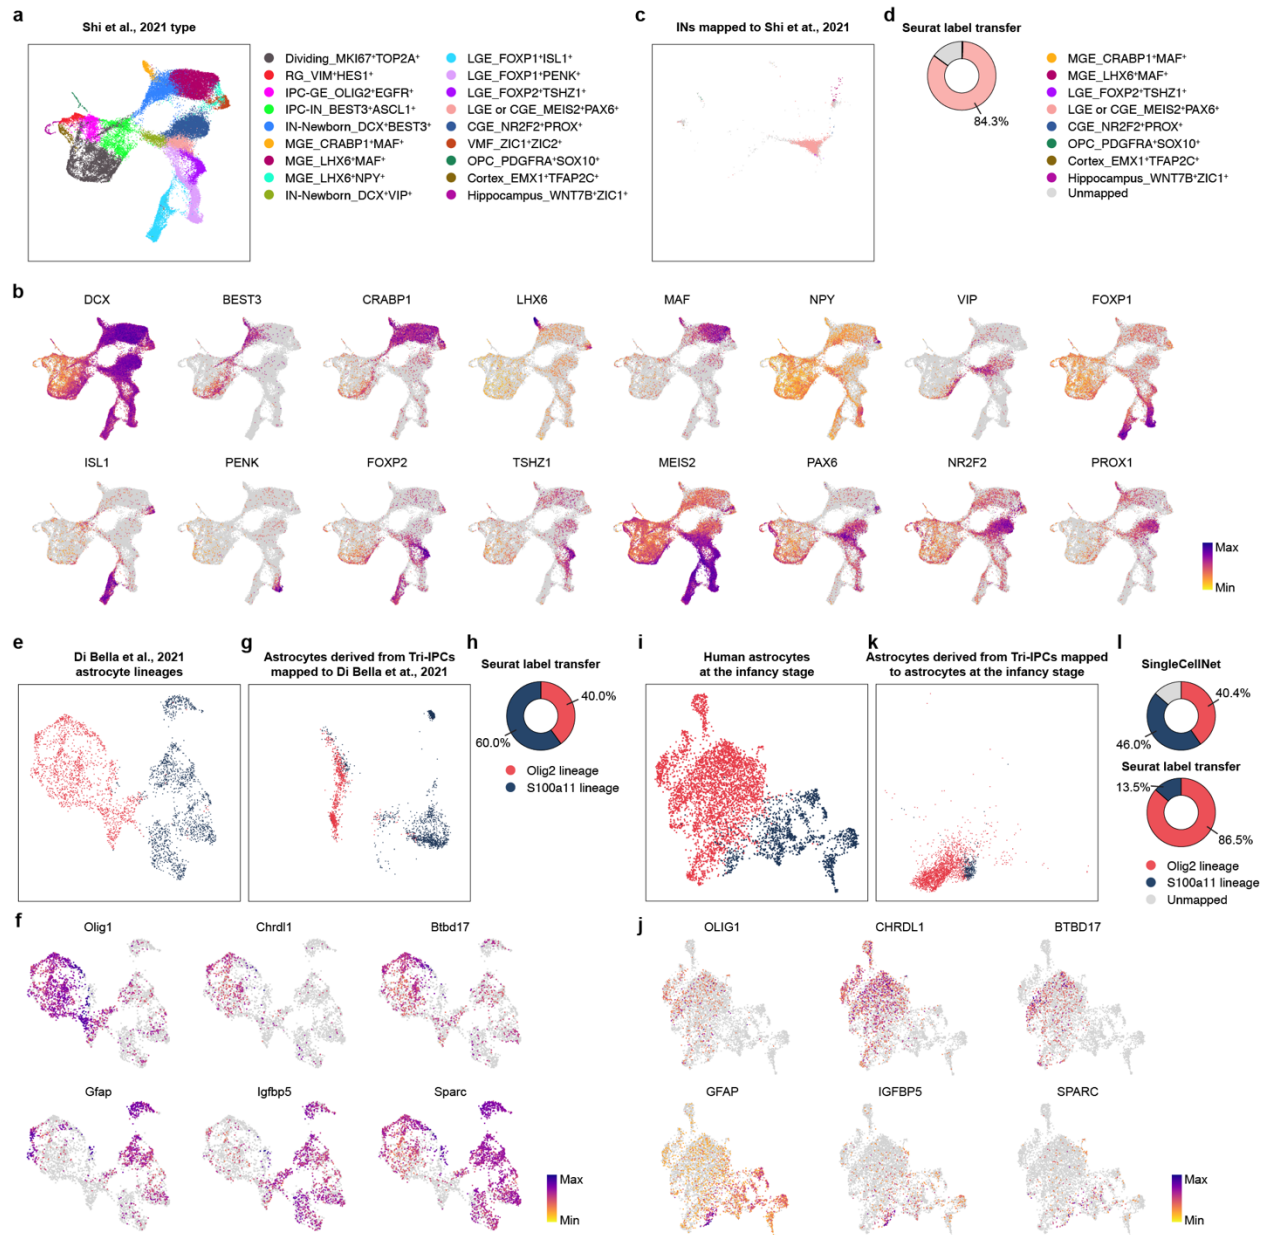

1314

1315 **Extended Data Fig. 13 | Mapping Tri-IPC progenies to reference data.** **a**, UMAP plot of a  
 1316 reference human ganglionic eminence dataset<sup>44</sup>. Cells are color-coded by types. **b**, UMAP plots of  
 1317 human ganglionic eminence cells showing the expression levels of typical marker genes of  
 1318 individual cell types. **c**, UMAP plots of Tri-IPC-derived INs projected to the human ganglionic  
 1319 eminence dataset. Cells are color-coded by types and the legend can be found in panel **d**. **d**,  
 1320 Identities of Tri-IPC-derived INs mapped by Seurat label transfer. **e**, UMAP plot of mouse  
 1321 astrocytes from a reference developing mouse cortex dataset<sup>48</sup>. Cells are color-coded by lineages  
 1322 and the legend can be found in panel **h**. **f**, UMAP plots of the reference mouse astrocytes showing  
 1323 the expression levels of typical marker genes of individual astrocyte lineages. **g**, UMAP plots of  
 1324 Tri-IPC-derived astrocytes projected to the reference mouse astrocytes. Cells are color-coded by  
 1325 lineages and the legend can be found in panel **h**. **h**, Identities of Tri-IPC-derived astrocytes mapped  
 1326 by Seurat label transfer. **i**, UMAP plot of human astrocytes at the infancy stage. Cells are color-

1327 coded by lineages and the legend can be found in panel **l**. **j**, UMAP plots of human astrocytes  
1328 showing the expression levels of typical marker genes of individual astrocyte lineages. **k**, UMAP  
1329 plots of Tri-IPC-derived astrocytes projected to the reference human astrocytes. Cells are color-  
1330 coded by lineages and the legend can be found in panel **l**. **l**, Identities of Tri-IPC-derived astrocytes  
1331 predicted by SingleCellNet (top) or mapped by Seurat label transfer (bottom).

1332



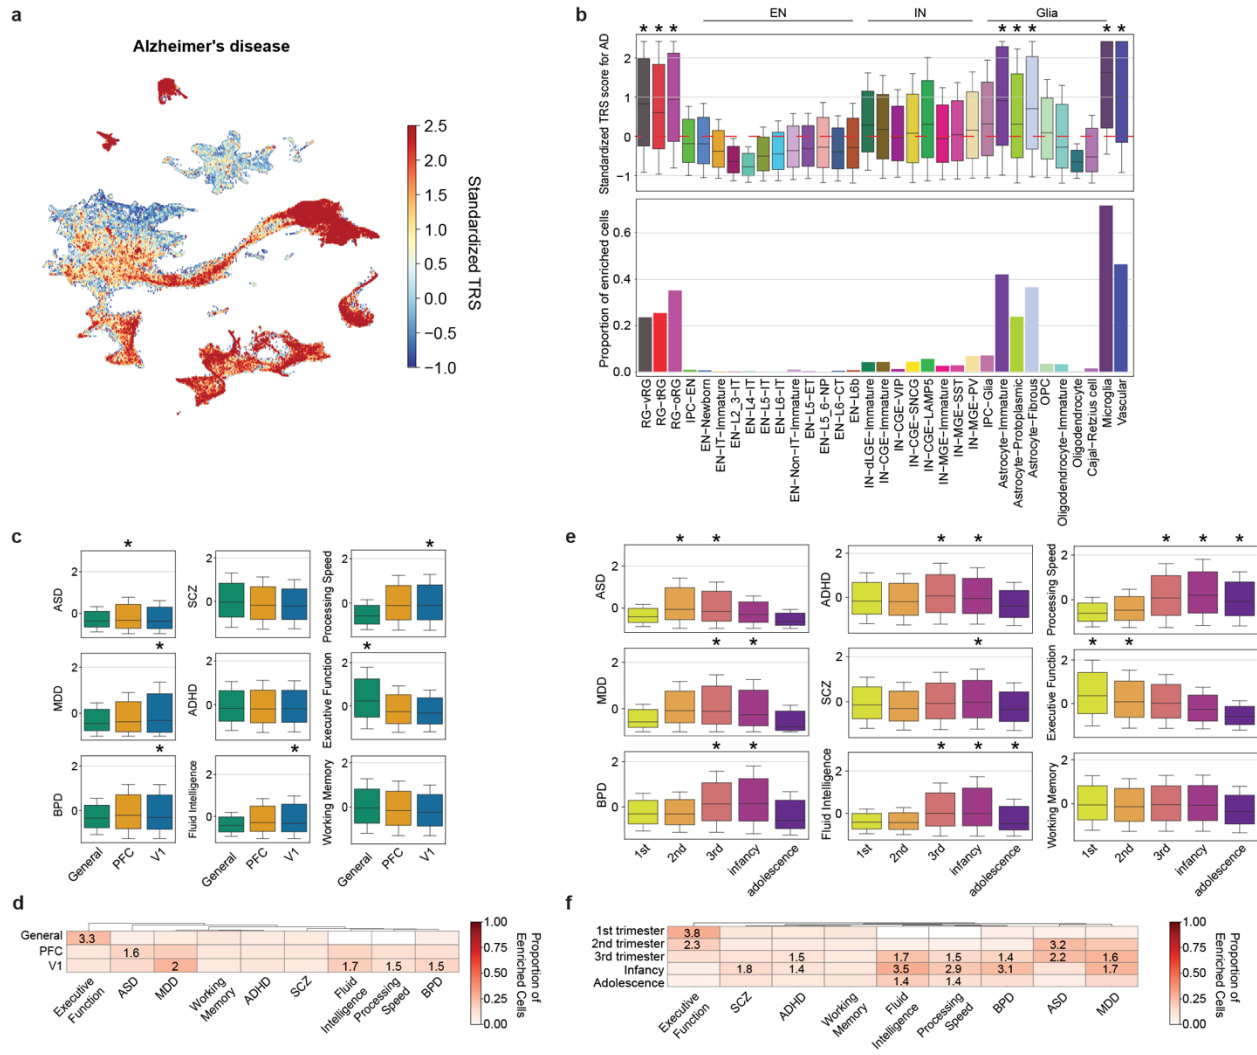

1333

1334 **Extended Data Fig. 14 | Neocortical cell association with human cognition and brain**

1335 **disorders.** **a**, UMAP plot showing the standardized per-cell SCAVENGE trait relevance

1336 (TRS) for Alzheimer's disease. **b**, Top, boxplots showing the standardized SCAVENGE TRS for

1337 Alzheimer's disease across cell types. Boxplot center: median; hinges: the 25th and 75th

1338 percentiles; whiskers: standard error. Bottom, bar plots showing the proportion of the cells with

1339 enriched trait relevance for Alzheimer's disease across cell types. Hypergeometry test; \*FDR <

1340 0.01 & odds ratio > 1.4. **c**, Boxplots showing standardized SCAVENGE TRS for nine cognitive

1341 and disease traits across regions. Boxplot center: median; hinges: the 25th and 75th percentiles;

1342 whiskers: standard error. Hypergeometry test; \*FDR < 0.01 & odds ratio > 1.4. **d**, Heatmap

1343 showing the proportion of the cells with enriched trait relevance across regions. Tiles with

1344 significant TRS enrichment (hypergeometric test, \*FDR < 0.01 & odds ratio > 1.4) are annotated

1345 by their odd ratios. **e**, Boxplots showing standardized SCAVENGE TRS for nine cognitive and

1346 disease traits across developmental stages. Boxplot center: median; hinges: the 25th and 75th

1347 percentiles; whiskers: standard error. Hypergeometry test; \*FDR < 0.01 & odds ratio > 1.4. **f**,

1348 Heatmap showing the proportion of the cells with enriched trait relevance across developmental

1349 stages. Tiles with significant TRS enrichment (hypergeometric test, \*FDR < 0.01 & odds ratio >

1350 1.4) are annotated by their odd ratios.
